# Supplementary material for: Barcoded Bulk QTL mapping reveals highly polygenic and epistatic architecture of complex traits in yeast
Source: bioRxiv preprint, doi:10.1101/2021.09.08.459513, version 1 (2021-09-09)
Supplement: Supplementary Data 3 [file 459513_file07.xlsx]

## Sheet: 23C_additive
QTL	Effect Size	Lead SNP Index	Chromosome	Lead SNP Position	Lead SNP Gene
1	-0.0147314	36462	15	172515	IRA2
2	0.0102405	34744	14	467214	MKT1
3	-0.00657126	26885	12	135855	LMO1
4	0.00610049	30979	13	88266	RPM2
5	0.00595748	28224	12	650211	HAP1
6	0.00566919	34703	14	442513	rps7b
7	-0.00537369	7982	4	998629	pex10
8	-0.0049891	18392	9	64944	MLP2
9	-0.00426751	36563	15	184291	AVO1
10	0.00422576	5318	4	51735	GCS1
11	0.00379001	28898	12	755552	CDC25
12	0.00371573	10491	5	379363	KAP123
13	-0.00368249	7120	4	538174	ENA1
14	-0.00322614	37864	15	482267	OST3
15	-0.00320947	5942	4	164089	fap7
16	0.00282142	30181	12	933519	YLR407W
17	-0.00277665	40945	16	503885	RMI1
18	0.00269514	7449	4	692593	TRM1
19	0.00266572	33241	13	820446	FCP1
20	-0.00264879	5260	3	283811	ycr097w-a
21	-0.00262403	2512	2	393270	ECM33
22	0.00254188	10883	5	526674	RAD3
23	0.00242441	7568	4	741894	san1
24	-0.00237516	25016	11	356202	mmo1
25	0.00236188	18994	9	195664	YIL089W
26	0.00235829	17986	8	479205	KOG1
27	-0.00224378	2770	2	429361	pho5
28	-0.00217724	40105	16	209279	PPQ1
29	0.00213775	14100	7	369881	HSF1
30	0.00200412	9893	5	186741	bim1
31	-0.0019692	26335	11	643809	sir1
32	0.00195932	30054	12	905886	ART10
33	0.00194538	22309	10	516436	pol32
34	-0.00194069	29570	12	824360	KAP95
35	-0.00191195	15262	7	853758	OKP1
36	0.00187346	35148	14	639282	ATG3
37	0.00178666	27629	12	442872	ylr152c
38	-0.00170836	197	1	38533	CNE1
39	-0.00168249	17502	8	312172	TRA1
40	0.00168134	21948	10	425129	cyr1
41	0.00164284	7922	4	959284	YDR249C
42	-0.00162355	465	1	112136	CCR4
43	0.0015993	27605	12	407846	USB1
44	-0.00158057	39615	15	998731	SOG2
45	-0.00158049	7424	4	664414	SPO71
46	-0.00153812	24756	11	268805	BUD2
47	-0.00152755	39325	15	851071	RRP36
48	0.00150482	28774	12	729241	EXG1
49	-0.00150114	2969	2	463355	CYC8
50	-0.00147582	660	1	166369	bud14
51	-0.00143962	10384	5	327428	ILV1
52	-0.00143791	30190	12	947536	CTR3
53	0.00141667	16891	8	110968	TCD1
54	-0.0014154	37375	15	414454	dbp5
55	0.00141326	26873	12	129090	sof1
56	-0.00136665	38015	15	504206	RKI1
57	0.00136228	14919	7	638787	PEX8
58	-0.00133718	24466	11	230445	kti12
59	0.00130141	17166	8	165865	DAP2
60	-0.00129248	27962	12	572185	CPR6
61	-0.00127577	29840	12	871151	VID22
62	-0.00125722	33315	13	848759	ABZ2
63	0.00124972	27645	12	495806	SEC10
64	-0.00124471	33588	13	914470	FET4
65	-0.00124308	30658	13	25025	PHO84
66	0.00122687	23975	11	136785	ykl165c-a
67	-0.00121808	15177	7	808199	rts3
68	0.00120998	7828	4	871043	YDR209C
69	0.00120003	37706	15	459134	nrt1
70	0.00115278	8258	4	1197839	TFC6
71	0.00114246	5213	3	251527	TUP1
72	0.00108833	15735	7	937780	TOS2
73	-0.00107131	29211	12	797626	NUP2
74	0.00106259	41297	16	691469	NOT5
75	0.00103001	27717	12	507074	CBF5
76	-0.0009466	25268	11	403410	RAM2
77	0.000944349	20745	10	103352	SET2
78	0.000942689	4963	3	151782	slm5
79	0.000878108	34366	14	299000	PBR1
80	0.000872904	1354	2	158800	RIB1
81	-0.000871861	41162	16	578938	RPA135
82	0.000868522	27126	12	257090	MNL2
83	0.000835416	1006	2	18636	SEA4
84	0.000803784	4341	2	667055	YBR225W
85	0.000784654	13303	7	128183	MDS3
86	-0.000770766	11456	6	66782	MIL1
87	0.000747873	9088	4	1502552	hsp31
88	0.000731399	30317	12	970287	DCK1
89	0.00066768	28368	12	674876	NEJ1
90	0.000647514	27550	12	369645	ccw12
91	-0.000643018	39689	16	26510	pbi1
92	-0.000642198	41444	16	814189	loa1
93	0.000611339	12846	7	36448	PDE1
94	-0.000590867	8459	4	1352373	YDR445C
95	0.000590043	3157	2	497803	HSL7
96	0.000482497	6237	4	222741	SRF1
97	-0.000444756	26573	12	79336	GPI13
98	-0.000390334	18781	9	136031	QDR1
99	-0.00036003	31936	13	331334	RSF1
100	-0.000270357	16554	8	49817	WSC4
101	-0.000249676	38231	15	522250	RGS2
102	-0.000240516	22934	10	653756	YJR124C
103	0.000227462	9933	5	194878	GPA2
104	-0.000180692	906	1	196423	swh1
105	-0.000102757	40710	16	455473	lee1
106	-7.50678e-05	3452	2	535807	ARA1
107	-6.76037e-05	38761	15	624279	PDR5
108	-5.09455e-05	10144	5	239003	ACA1
109	-4.58844e-05	36676	15	214472	MAM3
110	-1.44907e-06	6485	4	267844	KIN28
111	-0.0139024	5317	4	46068	ydl228c
112	0.0411027	9515	5	34040	npr2

## Sheet: 23C_epistatic
QTL	Effect	Lead SNP 1 Index	Chromosome 1	Lead SNP 1 Position	Lead SNP 1 Gene	Lead SNP 2 Index	Chromosome 2	Lead SNP 2 Position	Lead SNP 2 Gene
1	0.00862049	28224	12	650211	HAP1	30658	13	25025	PHO84
2	-0.00791147	30658	13	25025	PHO84	36462	15	172515	IRA2
3	0.00790491	28224	12	650211	HAP1	34744	14	467214	MKT1
4	0.00776269	30658	13	25025	PHO84	34744	14	467214	MKT1
5	-0.00545237	5318	4	51735	GCS1	34744	14	467214	MKT1
6	0.00509126	13303	7	128183	MDS3	36462	15	172515	IRA2
7	0.0049568	197	1	38533	CNE1	30658	13	25025	PHO84
8	0.00469875	27645	12	495806	SEC10	34744	14	467214	MKT1
9	0.00456164	197	1	38533	CNE1	36462	15	172515	IRA2
10	0.00452173	3452	2	535807	ARA1	36462	15	172515	IRA2
11	0.00436481	9933	5	194878	GPA2	36462	15	172515	IRA2
12	-0.00419253	5318	4	51735	GCS1	28224	12	650211	HAP1
13	-0.00378742	5260	3	283811	ycr097w-a	30658	13	25025	PHO84
14	-0.00375991	3452	2	535807	ARA1	28224	12	650211	HAP1
15	0.0035715	18781	9	136031	QDR1	36462	15	172515	IRA2
16	-0.00347653	34744	14	467214	MKT1	37706	15	459134	nrt1
17	0.00346957	26873	12	129090	sof1	26885	12	135855	LMO1
18	-0.00345988	36462	15	172515	IRA2	40945	16	503885	RMI1
19	0.00345484	36462	15	172515	IRA2	36563	15	184291	AVO1
20	0.00323688	5260	3	283811	ycr097w-a	34744	14	467214	MKT1
21	-0.00317592	36462	15	172515	IRA2	38231	15	522250	RGS2
22	0.00313181	16891	8	110968	TCD1	30658	13	25025	PHO84
23	0.00299099	21948	10	425129	cyr1	36462	15	172515	IRA2
24	0.0029719	23975	11	136785	ykl165c-a	36462	15	172515	IRA2
25	-0.00293273	5318	4	51735	GCS1	30658	13	25025	PHO84
26	0.00292192	28224	12	650211	HAP1	30190	12	947536	CTR3
27	0.00291251	30317	12	970287	DCK1	36563	15	184291	AVO1
28	-0.00289974	28224	12	650211	HAP1	37375	15	414454	dbp5
29	0.00280187	7982	4	998629	pex10	16891	8	110968	TCD1
30	0.00276887	10491	5	379363	KAP123	36462	15	172515	IRA2
31	0.0027239	28224	12	650211	HAP1	36462	15	172515	IRA2
32	0.00272117	9933	5	194878	GPA2	30658	13	25025	PHO84
33	-0.00269159	30658	13	25025	PHO84	38231	15	522250	RGS2
34	-0.0026345	26885	12	135855	LMO1	36462	15	172515	IRA2
35	0.00261905	7982	4	998629	pex10	34744	14	467214	MKT1
36	-0.0025655	10491	5	379363	KAP123	34744	14	467214	MKT1
37	-0.00255221	3157	2	497803	HSL7	34744	14	467214	MKT1
38	0.00254132	13303	7	128183	MDS3	30658	13	25025	PHO84
39	0.00252045	27550	12	369645	ccw12	34744	14	467214	MKT1
40	0.00247277	2512	2	393270	ECM33	2770	2	429361	pho5
41	0.00244214	5942	4	164089	fap7	30658	13	25025	PHO84
42	0.00241343	5260	3	283811	ycr097w-a	28224	12	650211	HAP1
43	-0.00238489	30979	13	88266	RPM2	36462	15	172515	IRA2
44	-0.00227933	25016	11	356202	mmo1	36563	15	184291	AVO1
45	0.00220206	27645	12	495806	SEC10	28224	12	650211	HAP1
46	0.0021928	24466	11	230445	kti12	36563	15	184291	AVO1
47	0.00216102	30190	12	947536	CTR3	30317	12	970287	DCK1
48	-0.00215157	27645	12	495806	SEC10	36563	15	184291	AVO1
49	0.0021342	26873	12	129090	sof1	28368	12	674876	NEJ1
50	0.00212626	27645	12	495806	SEC10	30190	12	947536	CTR3
51	0.00210701	27645	12	495806	SEC10	30658	13	25025	PHO84
52	0.00206956	10491	5	379363	KAP123	28368	12	674876	NEJ1
53	0.00206852	24466	11	230445	kti12	30658	13	25025	PHO84
54	0.00206031	16891	8	110968	TCD1	27717	12	507074	CBF5
55	0.0020234	30190	12	947536	CTR3	33588	13	914470	FET4
56	0.00201232	31936	13	331334	RSF1	36462	15	172515	IRA2
57	0.00199431	9933	5	194878	GPA2	27717	12	507074	CBF5
58	0.00193604	7922	4	959284	YDR249C	36462	15	172515	IRA2
59	0.00190331	21948	10	425129	cyr1	28224	12	650211	HAP1
60	0.00187449	27962	12	572185	CPR6	30181	12	933519	YLR407W
61	-0.00187077	34744	14	467214	MKT1	40710	16	455473	lee1
62	0.00187012	197	1	38533	CNE1	27629	12	442872	ylr152c
63	0.00184226	30190	12	947536	CTR3	30658	13	25025	PHO84
64	0.00184046	4341	2	667055	YBR225W	36462	15	172515	IRA2
65	0.00183566	37864	15	482267	OST3	38015	15	504206	RKI1
66	-0.00182879	2512	2	393270	ECM33	34744	14	467214	MKT1
67	-0.00181113	16891	8	110968	TCD1	28224	12	650211	HAP1
68	0.00178442	5318	4	51735	GCS1	29570	12	824360	KAP95
69	-0.00173685	906	1	196423	swh1	10491	5	379363	KAP123
70	-0.00171786	34744	14	467214	MKT1	38015	15	504206	RKI1
71	0.00171524	15262	7	853758	OKP1	34744	14	467214	MKT1
72	0.00170968	26335	11	643809	sir1	37706	15	459134	nrt1
73	-0.00170947	3452	2	535807	ARA1	30317	12	970287	DCK1
74	-0.00170854	197	1	38533	CNE1	10491	5	379363	KAP123
75	-0.00165563	34703	14	442513	rps7b	36462	15	172515	IRA2
76	0.00164715	29211	12	797626	NUP2	36676	15	214472	MAM3
77	0.00163941	36462	15	172515	IRA2	38761	15	624279	PDR5
78	0.00162633	23975	11	136785	ykl165c-a	40945	16	503885	RMI1
79	0.00160492	27645	12	495806	SEC10	38761	15	624279	PDR5
80	0.00159454	18392	9	64944	MLP2	36462	15	172515	IRA2
81	0.00159378	18392	9	64944	MLP2	30658	13	25025	PHO84
82	-0.00158834	7120	4	538174	ENA1	36462	15	172515	IRA2
83	0.00157905	21948	10	425129	cyr1	34744	14	467214	MKT1
84	-0.00155828	28224	12	650211	HAP1	40945	16	503885	RMI1
85	-0.00155024	36462	15	172515	IRA2	40710	16	455473	lee1
86	0.00154864	13303	7	128183	MDS3	34703	14	442513	rps7b
87	-0.00154683	9893	5	186741	bim1	13303	7	128183	MDS3
88	-0.00152253	14100	7	369881	HSF1	30658	13	25025	PHO84
89	0.00152162	22934	10	653756	YJR124C	28368	12	674876	NEJ1
90	0.00151082	30658	13	25025	PHO84	31936	13	331334	RSF1
91	-0.00151074	18994	9	195664	YIL089W	27629	12	442872	ylr152c
92	-0.00150699	10883	5	526674	RAD3	34744	14	467214	MKT1
93	-0.00150183	16891	8	110968	TCD1	36462	15	172515	IRA2
94	-0.0014852	27962	12	572185	CPR6	33588	13	914470	FET4
95	-0.00148485	197	1	38533	CNE1	21948	10	425129	cyr1
96	-0.0014836	16554	8	49817	WSC4	36462	15	172515	IRA2
97	-0.00147963	7120	4	538174	ENA1	30658	13	25025	PHO84
98	-0.00146559	197	1	38533	CNE1	9933	5	194878	GPA2
99	-0.00145784	27717	12	507074	CBF5	37706	15	459134	nrt1
100	0.00145558	26335	11	643809	sir1	28224	12	650211	HAP1
101	0.00145376	14100	7	369881	HSF1	30190	12	947536	CTR3
102	-0.00144776	29211	12	797626	NUP2	37706	15	459134	nrt1
103	0.0014083	26335	11	643809	sir1	34703	14	442513	rps7b
104	0.00140723	25016	11	356202	mmo1	34744	14	467214	MKT1
105	-0.00140295	7120	4	538174	ENA1	34703	14	442513	rps7b
106	-0.00139325	26873	12	129090	sof1	30658	13	25025	PHO84
107	0.00137787	13303	7	128183	MDS3	26873	12	129090	sof1
108	0.00137757	28774	12	729241	EXG1	34703	14	442513	rps7b
109	0.00136888	18781	9	136031	QDR1	40945	16	503885	RMI1
110	0.00134676	197	1	38533	CNE1	38231	15	522250	RGS2
111	-0.00133845	27962	12	572185	CPR6	28224	12	650211	HAP1
112	0.0013288	31936	13	331334	RSF1	38015	15	504206	RKI1
113	0.00130796	30658	13	25025	PHO84	38761	15	624279	PDR5
114	-0.00130684	197	1	38533	CNE1	28774	12	729241	EXG1
115	-0.00130421	17166	8	165865	DAP2	36462	15	172515	IRA2
116	-0.00129361	197	1	38533	CNE1	13303	7	128183	MDS3
117	-0.00126356	8459	4	1352373	YDR445C	27645	12	495806	SEC10
118	0.00125965	7982	4	998629	pex10	28898	12	755552	CDC25
119	0.00125537	16891	8	110968	TCD1	18994	9	195664	YIL089W
120	-0.00125287	15735	7	937780	TOS2	22309	10	516436	pol32
121	0.00125235	22934	10	653756	YJR124C	34744	14	467214	MKT1
122	-0.00124046	197	1	38533	CNE1	30181	12	933519	YLR407W
123	-0.00123454	22309	10	516436	pol32	36462	15	172515	IRA2
124	-0.00122728	25268	11	403410	RAM2	28224	12	650211	HAP1
125	0.00122711	7120	4	538174	ENA1	18392	9	64944	MLP2
126	0.00121648	5260	3	283811	ycr097w-a	30190	12	947536	CTR3
127	0.00120093	14100	7	369881	HSF1	34703	14	442513	rps7b
128	-0.00119829	14919	7	638787	PEX8	30658	13	25025	PHO84
129	-0.00119052	9088	4	1502552	hsp31	27645	12	495806	SEC10
130	0.00119003	5942	4	164089	fap7	17166	8	165865	DAP2
131	-0.00117906	15735	7	937780	TOS2	28224	12	650211	HAP1
132	-0.00117501	22934	10	653756	YJR124C	30658	13	25025	PHO84
133	0.00116889	17986	8	479205	KOG1	30658	13	25025	PHO84
134	-0.00116074	7424	4	664414	SPO71	36462	15	172515	IRA2
135	-0.00115833	26873	12	129090	sof1	38231	15	522250	RGS2
136	-0.00115507	13303	7	128183	MDS3	21948	10	425129	cyr1
137	-0.00114242	16554	8	49817	WSC4	33588	13	914470	FET4
138	0.00113666	465	1	112136	CCR4	34744	14	467214	MKT1
139	-0.00113584	10491	5	379363	KAP123	30190	12	947536	CTR3
140	0.00113562	3452	2	535807	ARA1	40710	16	455473	lee1
141	0.00113099	4341	2	667055	YBR225W	30658	13	25025	PHO84
142	0.00112936	7120	4	538174	ENA1	37864	15	482267	OST3
143	0.00112435	5213	3	251527	TUP1	6485	4	267844	KIN28
144	-0.00111641	7449	4	692593	TRM1	28224	12	650211	HAP1
145	0.00111485	17502	8	312172	TRA1	27645	12	495806	SEC10
146	-0.00110655	3452	2	535807	ARA1	23975	11	136785	ykl165c-a
147	-0.00110237	7982	4	998629	pex10	30658	13	25025	PHO84
148	0.00109243	197	1	38533	CNE1	26885	12	135855	LMO1
149	-0.00108212	2512	2	393270	ECM33	30658	13	25025	PHO84
150	0.00107634	197	1	38533	CNE1	6485	4	267844	KIN28
151	0.00107168	13303	7	128183	MDS3	27645	12	495806	SEC10
152	-0.00107069	30658	13	25025	PHO84	33241	13	820446	FCP1
153	0.00107035	6237	4	222741	SRF1	22934	10	653756	YJR124C
154	-0.00106667	197	1	38533	CNE1	7922	4	959284	YDR249C
155	-0.00106226	7922	4	959284	YDR249C	33588	13	914470	FET4
156	-0.00105828	15735	7	937780	TOS2	30658	13	25025	PHO84
157	0.00105435	24466	11	230445	kti12	28774	12	729241	EXG1
158	0.00105159	197	1	38533	CNE1	14100	7	369881	HSF1
159	-0.00104751	9088	4	1502552	hsp31	34703	14	442513	rps7b
160	0.00104528	18392	9	64944	MLP2	26885	12	135855	LMO1
161	0.00104093	18781	9	136031	QDR1	38231	15	522250	RGS2
162	-0.00103999	30658	13	25025	PHO84	40710	16	455473	lee1
163	-0.00103946	9933	5	194878	GPA2	31936	13	331334	RSF1
164	0.00102715	10144	5	239003	ACA1	40710	16	455473	lee1
165	-0.0010236	38231	15	522250	RGS2	40945	16	503885	RMI1
166	0.000999103	10144	5	239003	ACA1	16891	8	110968	TCD1
167	0.00096931	24466	11	230445	kti12	27717	12	507074	CBF5
168	0.0019898	5317	4	46068	ydl228c	31936	13	331334	RSF1
169	-0.0023161	5317	4	46068	ydl228c	30979	13	88266	RPM2
170	0.00232462	5317	4	46068	ydl228c	27629	12	442872	ylr152c
171	-0.00247755	5317	4	46068	ydl228c	36462	15	172515	IRA2
172	-0.00317704	5317	4	46068	ydl228c	28898	12	755552	CDC25
173	0.00328063	5260	3	283811	ycr097w-a	5317	4	46068	ydl228c
174	-0.00690751	5317	4	46068	ydl228c	34703	14	442513	rps7b
175	0.00780136	5317	4	46068	ydl228c	28224	12	650211	HAP1
176	0.00837436	5317	4	46068	ydl228c	30658	13	25025	PHO84
177	-0.00917841	9515	5	34040	npr2	27645	12	495806	SEC10
178	0.00922065	9515	5	34040	npr2	25268	11	403410	RAM2
179	0.0102347	9515	5	34040	npr2	36676	15	214472	MAM3
180	-0.0126476	9515	5	34040	npr2	26573	12	79336	GPI13
181	-0.0138701	9515	5	34040	npr2	30658	13	25025	PHO84
182	0.0168767	5317	4	46068	ydl228c	34744	14	467214	MKT1
183	-0.0178022	9515	5	34040	npr2	34744	14	467214	MKT1
184	0.0231378	4963	3	151782	slm5	9515	5	34040	npr2
185	-0.0266944	9515	5	34040	npr2	28224	12	650211	HAP1

## Sheet: 25C_additive
QTL	Effect Size	Lead SNP Index	Chromosome	Lead SNP Position	Lead SNP Gene
1	-0.0127817	36462	15	172515	IRA2
2	0.0112626	34744	14	467214	MKT1
3	0.00607788	28225	12	650259	HAP1
4	-0.00535909	36255	15	151997	HAL9
5	0.00500779	5318	4	51735	GCS1
6	0.00497568	34703	14	442513	rps7b
7	-0.00453419	40936	16	502085	SKS1
8	0.00418212	21952	10	426616	CYR1
9	0.00387335	9928	5	194343	GPA2
10	-0.00340833	30676	13	30827	YML119W
11	-0.00324947	36567	15	186481	BRX1
12	-0.00318802	2425	2	380932	YBR071W
13	0.00293429	30135	12	921442	BDF1
14	-0.00272273	25016	11	356202	mmo1
15	-0.00259588	18392	9	64944	MLP2
16	0.002573	7487	4	721119	YDR133C
17	0.00241587	16890	8	110019	tcd1
18	0.00241317	18996	9	195864	YIL089W
19	0.00239461	30853	13	65881	NUP188
20	0.00238825	10492	5	381711	SWI4
21	0.00233447	31025	13	94695	AIM33
22	-0.00228192	7120	4	538174	ENA1
23	-0.00227595	37865	15	482608	OST3
24	-0.00225362	40103	16	207437	TCO89
25	0.00216821	30311	12	967267	DCK1
26	-0.00214918	38226	15	521781	RGS2
27	-0.00200137	5942	4	164089	fap7
28	-0.00197924	467	1	112549	CCR4
29	0.00193515	17986	8	479205	KOG1
30	-0.00183146	26593	12	83008	FRA1
31	-0.00182571	26339	11	645009	flo10
32	0.00181994	23985	11	138466	MCD4
33	0.00172873	28773	12	728726	exg1
34	-0.00172625	2968	2	463267	CYC8
35	0.00172538	27717	12	507074	CBF5
36	0.00169827	3452	2	535807	ARA1
37	-0.00169574	29840	12	871151	VID22
38	-0.00164969	10384	5	327428	ILV1
39	0.00162941	35103	14	612518	YNL011C
40	0.00162922	34366	14	299000	PBR1
41	-0.00161114	39615	15	998731	SOG2
42	-0.00157316	15193	7	810789	ygr161w-c
43	0.0015512	35739	15	66022	BSC6
44	0.00149722	28368	12	674876	NEJ1
45	0.00148282	8258	4	1197839	TFC6
46	-0.00146474	30658	13	25025	PHO84
47	0.00141294	6193	4	214858	RGT2
48	-0.00139852	2614	2	409365	TEC1
49	0.00136485	31936	13	331334	RSF1
50	0.00136322	33241	13	820446	FCP1
51	-0.0013617	33590	13	915509	fet4
52	-0.00133583	34028	14	118246	MET2
53	0.00132239	27629	12	442872	ylr152c
54	-0.00129462	30190	12	947536	CTR3
55	0.0012851	4120	2	626832	COS111
56	-0.00127006	22935	10	654613	ent3
57	-0.00126737	13552	7	166667	mpt5
58	-0.00123148	39239	15	838383	MOD5
59	0.00122379	7788	4	856367	SPC19
60	0.00120827	14907	7	629919	ROM1
61	-0.00120792	16557	8	51892	RIM101
62	0.00120711	41298	16	694512	TKL1
63	0.00119172	14100	7	369881	HSF1
64	-0.00115571	5771	4	129117	VMA1
65	-0.00112568	21295	10	248312	BCK1
66	0.00112256	27139	12	259470	shm2
67	-0.00112156	19582	9	340672	FAA3
68	-0.00110201	37642	15	446521	YNG1
69	0.00110036	36585	15	199783	NUF2
70	0.00108569	4963	3	151782	slm5
71	0.00108478	4340	2	666887	YBR225W
72	-0.00108424	17502	8	312172	TRA1
73	0.0010315	10285	5	261700	GIP2
74	0.00100848	1858	2	241482	nth2
75	0.000989741	17166	8	165865	DAP2
76	0.000987187	21414	10	326293	BIT61
77	0.000978303	35248	14	696242	DBP6
78	-0.000977829	659	1	166222	bud14
79	0.000948814	1006	2	18636	SEA4
80	0.00094021	14015	7	329109	VPS45
81	0.000900122	18711	9	125292	KGD1
82	0.000868046	10905	5	533193	BRR2
83	-0.000844881	8310	4	1256210	UBA2
84	0.000844825	29571	12	824405	KAP95
85	-0.000835781	41085	16	527304	cip1
86	0.000824745	38552	15	589839	arp8
87	-0.000823312	8611	4	1432814	PKH1
88	0.000815468	32359	13	459995	MTG1
89	-0.000815124	8459	4	1352373	YDR445C
90	0.000813766	10739	5	498966	SPT2
91	0.000770188	4782	3	50675	YCL042W
92	0.00076414	38974	15	700514	THI72
93	0.000742778	20929	10	124187	FAR1
94	0.000719517	37710	15	460430	NRT1
95	-0.000717417	5801	4	136987	YDL180W
96	-0.000712415	5246	3	271959	CDC39
97	-0.000691711	22585	10	579361	BNA2
98	-0.00068181	13412	7	138791	GCN1
99	0.000678938	17830	8	428426	DNA2
100	0.000669096	19945	9	415531	DAL3
101	-0.000668771	13301	7	127838	MDS3
102	-0.000660907	39458	15	892001	sly41
103	0.000655608	37357	15	411919	WHI2
104	0.000638929	9852	5	158527	FMP52
105	0.000625317	27605	12	407846	USB1
106	-0.000611329	32906	13	613251	ECM5
107	-0.000588043	9036	4	1495552	HLR1
108	0.00058665	900	1	195677	SWH1
109	0.000580584	20319	10	35752	OPT1
110	0.00055563	6509	4	272421	NSE4
111	-0.000549312	41441	16	812987	loa1
112	-0.000538701	11657	6	96955	GAT1
113	0.000517394	30718	13	39443	ATR1
114	-0.000483	10085	5	219011	ZRG8
115	0.000475697	40720	16	462317	dig1
116	-0.000453774	24443	11	227015	ABF1
117	0.000447097	28904	12	756804	CDC25
118	-0.00044156	27648	12	496834	SEC10
119	0.000440064	26616	12	88703	HSP104
120	0.000437724	12846	7	36448	PDE1
121	-0.000422265	25267	11	402726	RAM2
122	-0.000405522	22343	10	522284	TAH11
123	0.000273599	15735	7	937780	TOS2
124	0.000265977	19211	9	251033	VHR1
125	-0.000261375	15881	7	960362	YHB1
126	0.000254599	27551	12	370089	CCW12
127	0.000111674	7084	4	507180	mrh1
128	-0.000107258	38761	15	624279	PDR5
129	6.94375e-05	27951	12	570675	fre1
130	6.78801e-05	217	1	40914	GPB2
131	-4.27616e-05	5081	3	227781	ATG15
132	3.01621e-05	7424	4	664414	SPO71
133	-0.0130923	5317	4	46068	ydl228c
134	0.0343407	9518	5	34493	NPR2

## Sheet: 25C_epistatic
QTL	Effect	Lead SNP 1 Index	Chromosome 1	Lead SNP 1 Position	Lead SNP 1 Gene	Lead SNP 2 Index	Chromosome 2	Lead SNP 2 Position	Lead SNP 2 Gene
1	0.0062189	36462	15	172515	IRA2	36567	15	186481	BRX1
2	0.00591697	28225	12	650259	HAP1	34744	14	467214	MKT1
3	0.00590392	13301	7	127838	MDS3	13412	7	138791	GCN1
4	-0.00554008	5318	4	51735	GCS1	34744	14	467214	MKT1
5	0.00518371	28225	12	650259	HAP1	30658	13	25025	PHO84
6	-0.00515222	30658	13	25025	PHO84	36462	15	172515	IRA2
7	-0.00479114	34744	14	467214	MKT1	37710	15	460430	NRT1
8	-0.00466619	36255	15	151997	HAL9	36567	15	186481	BRX1
9	0.00444852	28225	12	650259	HAP1	36255	15	151997	HAL9
10	-0.00441644	3452	2	535807	ARA1	28225	12	650259	HAP1
11	-0.0042426	5318	4	51735	GCS1	28225	12	650259	HAP1
12	0.0040842	217	1	40914	GPB2	36462	15	172515	IRA2
13	0.00393393	30658	13	25025	PHO84	34744	14	467214	MKT1
14	0.00378828	18711	9	125292	KGD1	36462	15	172515	IRA2
15	0.0037559	9928	5	194343	GPA2	36462	15	172515	IRA2
16	-0.00374854	36462	15	172515	IRA2	40936	16	502085	SKS1
17	0.00374375	3452	2	535807	ARA1	36462	15	172515	IRA2
18	0.00363249	217	1	40914	GPB2	30658	13	25025	PHO84
19	0.00324439	27648	12	496834	SEC10	34744	14	467214	MKT1
20	-0.00317648	28225	12	650259	HAP1	37357	15	411919	WHI2
21	0.00309334	31936	13	331334	RSF1	36255	15	151997	HAL9
22	0.0030838	13301	7	127838	MDS3	36462	15	172515	IRA2
23	0.00288476	21952	10	426616	CYR1	36255	15	151997	HAL9
24	0.00274864	23985	11	138466	MCD4	36255	15	151997	HAL9
25	0.00250298	27551	12	370089	CCW12	34744	14	467214	MKT1
26	0.00249816	10492	5	381711	SWI4	36462	15	172515	IRA2
27	-0.00245977	5246	3	271959	CDC39	30658	13	25025	PHO84
28	-0.00245915	30853	13	65881	NUP188	36255	15	151997	HAL9
29	-0.00238557	10492	5	381711	SWI4	34744	14	467214	MKT1
30	0.0023448	10085	5	219011	ZRG8	30658	13	25025	PHO84
31	0.00232501	16890	8	110019	tcd1	27648	12	496834	SEC10
32	-0.0022914	18996	9	195864	YIL089W	27629	12	442872	ylr152c
33	0.0022596	24443	11	227015	ABF1	36567	15	186481	BRX1
34	-0.00224401	3452	2	535807	ARA1	34744	14	467214	MKT1
35	0.00223618	13412	7	138791	GCN1	30658	13	25025	PHO84
36	0.00222268	27648	12	496834	SEC10	28225	12	650259	HAP1
37	-0.00219112	27648	12	496834	SEC10	37710	15	460430	NRT1
38	0.00217491	9928	5	194343	GPA2	27717	12	507074	CBF5
39	0.00212758	30190	12	947536	CTR3	36462	15	172515	IRA2
40	0.0021267	26339	11	645009	flo10	37710	15	460430	NRT1
41	0.00211329	5318	4	51735	GCS1	29571	12	824405	KAP95
42	0.00208729	28225	12	650259	HAP1	30853	13	65881	NUP188
43	-0.00208458	7424	4	664414	SPO71	36255	15	151997	HAL9
44	0.00204775	16890	8	110019	tcd1	30658	13	25025	PHO84
45	0.00204209	22935	10	654613	ent3	34744	14	467214	MKT1
46	-0.00203855	5318	4	51735	GCS1	30658	13	25025	PHO84
47	-0.00201752	217	1	40914	GPB2	10492	5	381711	SWI4
48	-0.00201517	2614	2	409365	TEC1	34744	14	467214	MKT1
49	0.0019711	27629	12	442872	ylr152c	34744	14	467214	MKT1
50	0.00196424	27629	12	442872	ylr152c	30190	12	947536	CTR3
51	0.00194459	13412	7	138791	GCN1	36255	15	151997	HAL9
52	0.00194447	5246	3	271959	CDC39	28225	12	650259	HAP1
53	0.00192899	37710	15	460430	NRT1	37865	15	482608	OST3
54	-0.00189503	16890	8	110019	tcd1	28225	12	650259	HAP1
55	-0.0018948	7120	4	538174	ENA1	36255	15	151997	HAL9
56	0.00189274	26616	12	88703	HSP104	28225	12	650259	HAP1
57	0.00188075	28225	12	650259	HAP1	30190	12	947536	CTR3
58	-0.0018725	9928	5	194343	GPA2	13412	7	138791	GCN1
59	0.00182736	24443	11	227015	ABF1	30658	13	25025	PHO84
60	-0.00181955	217	1	40914	GPB2	13301	7	127838	MDS3
61	-0.00180943	31025	13	94695	AIM33	36255	15	151997	HAL9
62	0.0017924	10492	5	381711	SWI4	28368	12	674876	NEJ1
63	0.00178622	14100	7	369881	HSF1	34703	14	442513	rps7b
64	-0.00177254	36462	15	172515	IRA2	38226	15	521781	RGS2
65	-0.00176487	217	1	40914	GPB2	9928	5	194343	GPA2
66	0.00173988	30658	13	25025	PHO84	40103	16	207437	TCO89
67	0.00172071	217	1	40914	GPB2	27648	12	496834	SEC10
68	0.00171118	18392	9	64944	MLP2	30718	13	39443	ATR1
69	-0.00169943	27951	12	570675	fre1	28225	12	650259	HAP1
70	0.00169704	2425	2	380932	YBR071W	2614	2	409365	TEC1
71	0.00168079	4340	2	666887	YBR225W	36255	15	151997	HAL9
72	0.00168063	5801	4	136987	YDL180W	30658	13	25025	PHO84
73	0.00167991	22343	10	522284	TAH11	28225	12	650259	HAP1
74	0.0016759	10085	5	219011	ZRG8	36255	15	151997	HAL9
75	-0.00165375	25016	11	356202	mmo1	36462	15	172515	IRA2
76	0.00163199	467	1	112549	CCR4	34744	14	467214	MKT1
77	0.00161033	22935	10	654613	ent3	28225	12	650259	HAP1
78	0.00160383	217	1	40914	GPB2	14100	7	369881	HSF1
79	0.00159651	5081	3	227781	ATG15	34744	14	467214	MKT1
80	-0.00159024	217	1	40914	GPB2	28225	12	650259	HAP1
81	-0.00158364	36255	15	151997	HAL9	40720	16	462317	dig1
82	-0.00156716	900	1	195677	SWH1	10492	5	381711	SWI4
83	-0.00156683	27717	12	507074	CBF5	36462	15	172515	IRA2
84	-0.00156402	30676	13	30827	YML119W	37865	15	482608	OST3
85	-0.00156206	5318	4	51735	GCS1	30190	12	947536	CTR3
86	-0.00156004	29571	12	824405	KAP95	37710	15	460430	NRT1
87	0.00155902	3452	2	535807	ARA1	30718	13	39443	ATR1
88	0.0015471	31936	13	331334	RSF1	37865	15	482608	OST3
89	0.00153479	30658	13	25025	PHO84	31936	13	331334	RSF1
90	-0.0015223	5318	4	51735	GCS1	27629	12	442872	ylr152c
91	-0.00151885	10285	5	261700	GIP2	31936	13	331334	RSF1
92	0.0014808	13301	7	127838	MDS3	40936	16	502085	SKS1
93	0.00147556	18711	9	125292	KGD1	40936	16	502085	SKS1
94	-0.00145245	7120	4	538174	ENA1	34744	14	467214	MKT1
95	0.00144314	13301	7	127838	MDS3	27648	12	496834	SEC10
96	-0.00143582	8459	4	1352373	YDR445C	27648	12	496834	SEC10
97	0.00140699	5246	3	271959	CDC39	34744	14	467214	MKT1
98	0.00140276	27951	12	570675	fre1	30311	12	967267	DCK1
99	0.00138987	28904	12	756804	CDC25	36255	15	151997	HAL9
100	-0.00138161	14100	7	369881	HSF1	30658	13	25025	PHO84
101	0.00138128	36255	15	151997	HAL9	38761	15	624279	PDR5
102	0.00137992	27648	12	496834	SEC10	30658	13	25025	PHO84
103	-0.00137586	217	1	40914	GPB2	21952	10	426616	CYR1
104	-0.00134356	34744	14	467214	MKT1	40720	16	462317	dig1
105	0.00134326	23985	11	138466	MCD4	40936	16	502085	SKS1
106	-0.00132821	3452	2	535807	ARA1	23985	11	138466	MCD4
107	0.00132241	30190	12	947536	CTR3	33590	13	915509	fet4
108	0.00131586	31936	13	331334	RSF1	34744	14	467214	MKT1
109	0.00129687	21414	10	326293	BIT61	34744	14	467214	MKT1
110	0.00128629	27648	12	496834	SEC10	38761	15	624279	PDR5
111	-0.00125345	3452	2	535807	ARA1	30311	12	967267	DCK1
112	0.00124515	10285	5	261700	GIP2	40936	16	502085	SKS1
113	0.00124067	3452	2	535807	ARA1	40720	16	462317	dig1
114	-0.00122882	15735	7	937780	TOS2	28225	12	650259	HAP1
115	0.00121808	26339	11	645009	flo10	28225	12	650259	HAP1
116	-0.00121039	17166	8	165865	DAP2	36255	15	151997	HAL9
117	-0.00120969	18711	9	125292	KGD1	23985	11	138466	MCD4
118	-0.00119693	13412	7	138791	GCN1	31936	13	331334	RSF1
119	0.00118674	5801	4	136987	YDL180W	17166	8	165865	DAP2
120	-0.00118072	4120	2	626832	COS111	32359	13	459995	MTG1
121	-0.00117864	9036	4	1495552	HLR1	27648	12	496834	SEC10
122	-0.00117634	28225	12	650259	HAP1	33590	13	915509	fet4
123	-0.00117099	16557	8	51892	RIM101	36462	15	172515	IRA2
124	0.00116372	27629	12	442872	ylr152c	31936	13	331334	RSF1
125	0.00116339	27551	12	370089	CCW12	28368	12	674876	NEJ1
126	-0.00116256	2968	2	463267	CYC8	37710	15	460430	NRT1
127	0.0011616	7487	4	721119	YDR133C	36255	15	151997	HAL9
128	-0.0011603	900	1	195677	SWH1	36462	15	172515	IRA2
129	0.00115412	23985	11	138466	MCD4	27629	12	442872	ylr152c
130	0.00114551	16890	8	110019	tcd1	18996	9	195864	YIL089W
131	0.00114259	32359	13	459995	MTG1	36255	15	151997	HAL9
132	0.00113784	28904	12	756804	CDC25	30190	12	947536	CTR3
133	-0.00113186	18392	9	64944	MLP2	29571	12	824405	KAP95
134	-0.00112645	3452	2	535807	ARA1	13412	7	138791	GCN1
135	0.00112608	19211	9	251033	VHR1	27605	12	407846	USB1
136	0.0011242	25016	11	356202	mmo1	34744	14	467214	MKT1
137	0.00109622	7120	4	538174	ENA1	37710	15	460430	NRT1
138	0.00109441	26339	11	645009	flo10	27629	12	442872	ylr152c
139	-0.00108198	3452	2	535807	ARA1	40103	16	207437	TCO89
140	0.00107749	14100	7	369881	HSF1	30135	12	921442	BDF1
141	-0.00106249	18711	9	125292	KGD1	31936	13	331334	RSF1
142	-0.00105878	26593	12	83008	FRA1	36567	15	186481	BRX1
143	0.00105612	7084	4	507180	mrh1	27717	12	507074	CBF5
144	-0.00105472	14907	7	629919	ROM1	30676	13	30827	YML119W
145	-0.00105208	13301	7	127838	MDS3	21952	10	426616	CYR1
146	0.00104058	17986	8	479205	KOG1	30718	13	39443	ATR1
147	-0.00103933	7120	4	538174	ENA1	30658	13	25025	PHO84
148	0.00103324	13552	7	166667	mpt5	26593	12	83008	FRA1
149	-0.00102567	22585	10	579361	BNA2	36255	15	151997	HAL9
150	0.00102402	5801	4	136987	YDL180W	34744	14	467214	MKT1
151	-0.0010223	25267	11	402726	RAM2	28225	12	650259	HAP1
152	-0.000996837	900	1	195677	SWH1	13552	7	166667	mpt5
153	0.000995549	5246	3	271959	CDC39	5942	4	164089	fap7
154	0.000984887	28773	12	728726	exg1	34028	14	118246	MET2
155	0.000975595	6509	4	272421	NSE4	22935	10	654613	ent3
156	0.000974731	26339	11	645009	flo10	34703	14	442513	rps7b
157	-0.000967886	9928	5	194343	GPA2	23985	11	138466	MCD4
158	0.000967312	29840	12	871151	VID22	30658	13	25025	PHO84
159	0.000964127	24443	11	227015	ABF1	34703	14	442513	rps7b
160	-0.000960659	33241	13	820446	FCP1	40720	16	462317	dig1
161	0.000955331	10492	5	381711	SWI4	19582	9	340672	FAA3
162	-0.00094172	15735	7	937780	TOS2	30311	12	967267	DCK1
163	0.000938572	16557	8	51892	RIM101	22585	10	579361	BNA2
164	0.000937634	9036	4	1495552	HLR1	31025	13	94695	AIM33
165	-0.000934304	25267	11	402726	RAM2	37865	15	482608	OST3
166	-0.000926904	16890	8	110019	tcd1	36462	15	172515	IRA2
167	-0.000923033	15881	7	960362	YHB1	21952	10	426616	CYR1
168	0.00166776	5317	4	46068	ydl228c	22935	10	654613	ent3
169	0.00181568	5246	3	271959	CDC39	5317	4	46068	ydl228c
170	-0.00189594	5317	4	46068	ydl228c	37357	15	411919	WHI2
171	0.00215018	5317	4	46068	ydl228c	31936	13	331334	RSF1
172	-0.00226445	5317	4	46068	ydl228c	27951	12	570675	fre1
173	0.00268499	5317	4	46068	ydl228c	30190	12	947536	CTR3
174	-0.00311772	5317	4	46068	ydl228c	29571	12	824405	KAP95
175	0.0039044	5317	4	46068	ydl228c	27648	12	496834	SEC10
176	0.00442174	5317	4	46068	ydl228c	36255	15	151997	HAL9
177	0.00453359	5317	4	46068	ydl228c	30658	13	25025	PHO84
178	-0.00606836	5317	4	46068	ydl228c	36462	15	172515	IRA2
179	-0.00665078	5317	4	46068	ydl228c	34703	14	442513	rps7b
180	0.00722736	5317	4	46068	ydl228c	28225	12	650259	HAP1
181	-0.00776392	467	1	112549	CCR4	9518	5	34493	NPR2
182	-0.00968868	9518	5	34493	NPR2	27648	12	496834	SEC10
183	-0.00972049	9518	5	34493	NPR2	26593	12	83008	FRA1
184	-0.00998324	9518	5	34493	NPR2	30658	13	25025	PHO84
185	0.0113867	9518	5	34493	NPR2	36585	15	199783	NUF2
186	-0.0122716	9518	5	34493	NPR2	28368	12	674876	NEJ1
187	-0.0144432	9518	5	34493	NPR2	34744	14	467214	MKT1
188	0.0156691	4963	3	151782	slm5	9518	5	34493	NPR2
189	0.0162554	5317	4	46068	ydl228c	34744	14	467214	MKT1

## Sheet: 27C_additive
QTL	Effect Size	Lead SNP Index	Chromosome	Lead SNP Position	Lead SNP Gene
1	-0.0118409	36460	15	172102	IRA2
2	0.00817581	34744	14	467214	MKT1
3	0.00539496	34766	14	487930	MLF3
4	-0.00529442	30675	13	29994	ndi1
5	-0.00509906	33591	13	915747	fet4
6	-0.00486549	18393	9	65121	MLP2
7	-0.00458686	37849	15	479709	WHI5
8	-0.00411238	40936	16	502085	SKS1
9	0.00371923	10491	5	379363	KAP123
10	-0.0036843	26885	12	135855	LMO1
11	0.00356424	30854	13	67103	NUP188
12	0.00325359	7533	4	730611	HPR1
13	-0.00323607	36255	15	151997	HAL9
14	0.0032285	5318	4	51735	GCS1
15	0.00295249	30182	12	934433	UTP21
16	0.0028955	35739	15	66022	BSC6
17	-0.00286516	2517	2	393709	ECM33
18	-0.00282435	21305	10	252640	KHA1
19	-0.0026963	39615	15	998731	SOG2
20	-0.00260431	34770	14	495913	FKH2
21	0.00254192	8258	4	1197839	TFC6
22	0.00243464	28773	12	728726	exg1
23	-0.00228385	40103	16	207437	TCO89
24	0.00221744	27628	12	442614	PCD1
25	-0.00215192	2613	2	409265	TEC1
26	-0.00210766	26333	11	642733	sir1
27	0.00208923	33237	13	817301	BUL1
28	0.00208114	31025	13	94695	AIM33
29	0.00206864	21951	10	426287	CYR1
30	0.00206471	23975	11	136785	ykl165c-a
31	0.00201186	1801	2	231704	UTP20
32	-0.00200711	3459	2	536667	tbs1
33	0.00199125	4340	2	666887	YBR225W
34	0.00197749	9930	5	194649	GPA2
35	0.00196724	26874	12	129764	PSR1
36	0.00195883	21317	10	272191	TRL1
37	0.00195124	32087	13	391443	SEN15
38	0.00190627	13302	7	128174	MDS3
39	-0.00188029	5942	4	164089	fap7
40	0.00180484	14098	7	369600	HSF1
41	-0.00180099	14189	7	399014	OLE1
42	-0.00179724	25016	11	356202	mmo1
43	-0.00174855	39228	15	836059	TPO4
44	0.0017298	28226	12	650766	HAP1
45	0.00172771	18994	9	195664	YIL089W
46	-0.00172587	34691	14	418761	ynl109w
47	-0.00171292	2425	2	380932	YBR071W
48	-0.00166134	5260	3	283811	ycr097w-a
49	0.00161816	40716	16	462071	mnn9
50	-0.00160879	26583	12	81096	fra1
51	-0.00155168	3155	2	497569	HSL7
52	-0.00153952	16556	8	51314	RIM101
53	0.00152714	22937	10	656568	VPS70
54	-0.00152615	9780	5	83617	ANP1
55	0.00152548	28898	12	755552	CDC25
56	-0.00151706	7120	4	538174	ENA1
57	0.00151415	28092	12	617705	VPS34
58	0.00151284	37710	15	460430	NRT1
59	-0.00149396	8286	4	1235721	ARO10
60	-0.00146576	25227	11	396472	CDC16
61	-0.00146503	30658	13	25025	PHO84
62	0.00145119	35103	14	612518	YNL011C
63	0.00142509	34366	14	299000	PBR1
64	0.00142204	17986	8	479205	KOG1
65	0.00135592	30053	12	905770	ART10
66	0.00133956	35246	14	695354	rsm19
67	0.0013378	34598	14	402763	DCP2
68	0.00131737	19221	9	252105	YIL055C
69	0.00129319	27135	12	258651	SHM2
70	-0.00129181	8817	4	1462837	GIN4
71	-0.00127324	29571	12	824405	KAP95
72	0.00122799	26762	12	112356	dps1
73	0.00120861	13056	7	93397	NCS6
74	-0.00120438	38760	15	624091	PDR5
75	0.00120346	39542	15	966135	yor342c
76	0.00117258	21414	10	326293	BIT61
77	-0.00114661	10384	5	327428	ILV1
78	0.00113754	10904	5	532891	BRR2
79	0.00109157	7829	4	871374	YDR209C
80	-0.00107883	15735	7	937780	TOS2
81	-0.00106721	4845	3	79867	KCC4
82	-0.00105842	25408	11	428954	cap1
83	-0.00104186	38226	15	521781	RGS2
84	-0.00102921	39462	15	892332	sly41
85	0.00102045	27547	12	369484	ahp1
86	-0.00101616	19379	9	276935	GVP36
87	0.00101175	41301	16	695784	OPY2
88	-0.00100469	468	1	112742	CCR4
89	-0.00100303	15189	7	809640	rts3
90	-0.000994882	30190	12	947536	CTR3
91	-0.00097914	659	1	166222	bud14
92	0.0009648	1006	2	18636	SEA4
93	0.000960626	1101	2	112335	SHP1
94	0.000955239	6509	4	272421	NSE4
95	-0.000954649	17497	8	298948	sfb3
96	-0.000944594	38552	15	589839	arp8
97	-0.000910949	2968	2	463267	CYC8
98	-0.000908398	39689	16	26510	pbi1
99	-0.000869596	9088	4	1502552	hsp31
100	0.00082837	22343	10	522284	TAH11
101	-0.000791733	37646	15	448221	CYT1
102	0.00076794	4781	3	50560	YCL041C
103	-0.000757269	33973	14	95507	CUS2
104	0.000734249	14907	7	629919	ROM1
105	0.000688731	38964	15	691977	SPR1
106	0.000641778	10097	5	222671	ARB1
107	0.000607624	4963	3	151782	slm5
108	-0.000605443	33427	13	878991	YMR304C-A
109	-0.000605299	37352	15	411283	WHI2
110	-0.000591899	11902	6	148729	deg1
111	-0.000559286	6753	4	328957	AHK1
112	0.000540134	7275	4	589875	IPT1
113	0.000527117	7084	4	507180	mrh1
114	0.000526447	20321	10	35830	OPT1
115	-0.000509933	41444	16	814189	loa1
116	0.000490808	217	1	40914	GPB2
117	0.000487423	27648	12	496834	SEC10
118	0.000442213	17141	8	162835	RPN1
119	0.000403969	31936	13	331334	RSF1
120	0.000383676	5840	4	147362	DLD1
121	0.000381706	18880	9	164335	PFK26
122	-0.000369241	16891	8	110968	TCD1
123	0.000368102	25752	11	532745	MRS4
124	-0.000347185	34704	14	442643	rps7b
125	0.000334925	9852	5	158527	FMP52
126	0.000299678	20950	10	126877	SSY5
127	0.000285654	28362	12	674198	nej1
128	0.000267342	30316	12	969879	DCK1
129	-0.000247381	29212	12	797756	NUP2
130	0.000239037	27605	12	407846	USB1
131	0.000238493	27951	12	570675	fre1
132	-0.000222084	29840	12	871151	VID22
133	0.000204028	39743	16	75046	atg41
134	-0.000191684	31721	13	261255	TRM12
135	0.000183454	4241	2	646037	MET8
136	0.00013974	901	1	195872	SWH1
137	0.000129854	15807	7	953711	phb2
138	-0.000125459	10372	5	301558	vtc1
139	-0.000122438	30755	13	49008	BUL2
140	0.000117354	34074	14	185843	VPS75
141	0.000109107	13993	7	319346	use1
142	-9.92188e-05	6236	4	222481	SRF1
143	-8.76816e-05	33138	13	721591	ymr226c
144	3.22133e-05	41041	16	514987	VTC3
145	-1.74552e-05	36586	15	201792	HST1
146	-9.05027e-06	24450	11	227628	ABF1
147	-1.50837e-06	8458	4	1350137	ydr444w
148	-0.0126367	5316	4	45363	SSB1
149	0.0433485	9518	5	34493	NPR2

## Sheet: 27C_epistatic
QTL	Effect	Lead SNP 1 Index	Chromosome 1	Lead SNP 1 Position	Lead SNP 1 Gene	Lead SNP 2 Index	Chromosome 2	Lead SNP 2 Position	Lead SNP 2 Gene
1	0.00680247	28226	12	650766	HAP1	30658	13	25025	PHO84
2	0.00569864	30658	13	25025	PHO84	34744	14	467214	MKT1
3	-0.00543382	34744	14	467214	MKT1	37710	15	460430	NRT1
4	0.00495815	26333	11	642733	sir1	37710	15	460430	NRT1
5	0.00483151	28226	12	650766	HAP1	34744	14	467214	MKT1
6	0.00453576	9930	5	194649	GPA2	36460	15	172102	IRA2
7	-0.00447279	5318	4	51735	GCS1	28226	12	650766	HAP1
8	-0.00440629	30658	13	25025	PHO84	36460	15	172102	IRA2
9	0.00437355	217	1	40914	GPB2	30658	13	25025	PHO84
10	-0.00407974	5318	4	51735	GCS1	34744	14	467214	MKT1
11	-0.00405971	30854	13	67103	NUP188	36255	15	151997	HAL9
12	-0.00392769	28226	12	650766	HAP1	37352	15	411283	WHI2
13	0.00383225	13302	7	128174	MDS3	36460	15	172102	IRA2
14	-0.0038216	3459	2	536667	tbs1	28226	12	650766	HAP1
15	-0.00371758	27648	12	496834	SEC10	37710	15	460430	NRT1
16	0.00371617	217	1	40914	GPB2	36460	15	172102	IRA2
17	0.00365335	3459	2	536667	tbs1	36460	15	172102	IRA2
18	0.00356279	2517	2	393709	ECM33	2613	2	409265	TEC1
19	0.00321029	28362	12	674198	nej1	36255	15	151997	HAL9
20	-0.00319672	36460	15	172102	IRA2	41041	16	514987	VTC3
21	0.00309924	28226	12	650766	HAP1	30755	13	49008	BUL2
22	0.00299974	27648	12	496834	SEC10	34744	14	467214	MKT1
23	0.00291187	217	1	40914	GPB2	14189	7	399014	OLE1
24	0.00286852	28226	12	650766	HAP1	30190	12	947536	CTR3
25	-0.0028491	30658	13	25025	PHO84	34766	14	487930	MLF3
26	0.00284888	30190	12	947536	CTR3	33591	13	915747	fet4
27	-0.00283427	36255	15	151997	HAL9	36460	15	172102	IRA2
28	0.00278515	21951	10	426287	CYR1	36460	15	172102	IRA2
29	-0.00277483	5260	3	283811	ycr097w-a	30658	13	25025	PHO84
30	0.00276965	9930	5	194649	GPA2	30658	13	25025	PHO84
31	0.00270279	10491	5	379363	KAP123	36460	15	172102	IRA2
32	0.00266249	22937	10	656568	VPS70	31721	13	261255	TRM12
33	0.00260027	31936	13	331334	RSF1	36255	15	151997	HAL9
34	0.00259289	5260	3	283811	ycr097w-a	34744	14	467214	MKT1
35	-0.00257829	5318	4	51735	GCS1	30658	13	25025	PHO84
36	0.00256677	18393	9	65121	MLP2	36460	15	172102	IRA2
37	0.00256534	5260	3	283811	ycr097w-a	28226	12	650766	HAP1
38	-0.00253581	7275	4	589875	IPT1	36255	15	151997	HAL9
39	0.00249598	24450	11	227628	ABF1	36255	15	151997	HAL9
40	-0.0024683	10491	5	379363	KAP123	34744	14	467214	MKT1
41	0.00244245	27648	12	496834	SEC10	28226	12	650766	HAP1
42	0.00235687	27547	12	369484	ahp1	34744	14	467214	MKT1
43	0.00228384	14189	7	399014	OLE1	34744	14	467214	MKT1
44	0.00223135	26874	12	129764	PSR1	28362	12	674198	nej1
45	0.00222329	30658	13	25025	PHO84	41041	16	514987	VTC3
46	0.00219151	33427	13	878991	YMR304C-A	33591	13	915747	fet4
47	-0.00216375	901	1	195872	SWH1	10491	5	379363	KAP123
48	-0.00215072	217	1	40914	GPB2	10491	5	379363	KAP123
49	-0.00214589	26885	12	135855	LMO1	36460	15	172102	IRA2
50	0.00213442	38552	15	589839	arp8	38760	15	624091	PDR5
51	0.00213364	4845	3	79867	KCC4	4963	3	151782	slm5
52	0.00212331	21951	10	426287	CYR1	28226	12	650766	HAP1
53	0.00211956	31936	13	331334	RSF1	34744	14	467214	MKT1
54	-0.00209394	30658	13	25025	PHO84	36255	15	151997	HAL9
55	-0.00209072	30658	13	25025	PHO84	37710	15	460430	NRT1
56	-0.00207557	5318	4	51735	GCS1	27628	12	442614	PCD1
57	-0.00206767	22937	10	656568	VPS70	36460	15	172102	IRA2
58	0.0020437	16891	8	110968	TCD1	27648	12	496834	SEC10
59	0.00203745	16891	8	110968	TCD1	30658	13	25025	PHO84
60	0.00201804	23975	11	136785	ykl165c-a	36460	15	172102	IRA2
61	0.00200317	10097	5	222671	ARB1	36255	15	151997	HAL9
62	0.00198237	6236	4	222481	SRF1	30658	13	25025	PHO84
63	-0.00196095	28226	12	650766	HAP1	41041	16	514987	VTC3
64	-0.0019465	7275	4	589875	IPT1	28226	12	650766	HAP1
65	0.00190968	36255	15	151997	HAL9	38552	15	589839	arp8
66	0.00190254	28898	12	755552	CDC25	36255	15	151997	HAL9
67	0.00190076	32087	13	391443	SEN15	36460	15	172102	IRA2
68	0.00189638	9930	5	194649	GPA2	27648	12	496834	SEC10
69	0.00189406	22937	10	656568	VPS70	28226	12	650766	HAP1
70	-0.00188735	3155	2	497569	HSL7	34744	14	467214	MKT1
71	0.00187313	24450	11	227628	ABF1	30658	13	25025	PHO84
72	0.00187214	26333	11	642733	sir1	34744	14	467214	MKT1
73	0.00187149	37352	15	411283	WHI2	37646	15	448221	CYT1
74	0.00186419	30658	13	25025	PHO84	31936	13	331334	RSF1
75	0.0018308	13993	7	319346	use1	34704	14	442643	rps7b
76	0.00182966	468	1	112742	CCR4	34744	14	467214	MKT1
77	-0.00182729	9930	5	194649	GPA2	13302	7	128174	MDS3
78	-0.00181275	34744	14	467214	MKT1	40716	16	462071	mnn9
79	0.00179981	26333	11	642733	sir1	28226	12	650766	HAP1
80	-0.00179928	27648	12	496834	SEC10	36255	15	151997	HAL9
81	-0.00179283	25016	11	356202	mmo1	36460	15	172102	IRA2
82	-0.00178239	30190	12	947536	CTR3	37710	15	460430	NRT1
83	-0.00176566	18994	9	195664	YIL089W	27628	12	442614	PCD1
84	0.001764	5318	4	51735	GCS1	27951	12	570675	fre1
85	0.00175111	30658	13	25025	PHO84	40103	16	207437	TCO89
86	-0.00174346	4963	3	151782	slm5	27605	12	407846	USB1
87	0.00173162	16891	8	110968	TCD1	34704	14	442643	rps7b
88	0.00172562	3155	2	497569	HSL7	3459	2	536667	tbs1
89	0.00170638	22937	10	656568	VPS70	34704	14	442643	rps7b
90	-0.00170616	34704	14	442643	rps7b	36460	15	172102	IRA2
91	0.00170046	13302	7	128174	MDS3	30658	13	25025	PHO84
92	-0.00169522	14189	7	399014	OLE1	30675	13	29994	ndi1
93	-0.00169423	36255	15	151997	HAL9	40716	16	462071	mnn9
94	0.00168487	17986	8	479205	KOG1	30658	13	25025	PHO84
95	0.00167837	14098	7	369600	HSF1	30053	12	905770	ART10
96	-0.00167217	34744	14	467214	MKT1	37352	15	411283	WHI2
97	-0.00165947	8458	4	1350137	ydr444w	28226	12	650766	HAP1
98	-0.00165233	28773	12	728726	exg1	37646	15	448221	CYT1
99	0.00164569	27951	12	570675	fre1	30316	12	969879	DCK1
100	0.00164024	33591	13	915747	fet4	37710	15	460430	NRT1
101	0.00160529	30316	12	969879	DCK1	36255	15	151997	HAL9
102	0.00159647	32087	13	391443	SEN15	37710	15	460430	NRT1
103	0.00158944	27605	12	407846	USB1	30190	12	947536	CTR3
104	0.00158832	28226	12	650766	HAP1	31936	13	331334	RSF1
105	0.00156248	28898	12	755552	CDC25	30182	12	934433	UTP21
106	0.00156239	3459	2	536667	tbs1	30658	13	25025	PHO84
107	0.00155662	27628	12	442614	PCD1	30658	13	25025	PHO84
108	0.00154805	4241	2	646037	MET8	36255	15	151997	HAL9
109	-0.00154729	217	1	40914	GPB2	9930	5	194649	GPA2
110	0.00149902	27547	12	369484	ahp1	28226	12	650766	HAP1
111	0.00149652	27628	12	442614	PCD1	31936	13	331334	RSF1
112	0.00148915	37710	15	460430	NRT1	39228	15	836059	TPO4
113	0.00148879	28226	12	650766	HAP1	36586	15	201792	HST1
114	0.00148553	21951	10	426287	CYR1	34744	14	467214	MKT1
115	-0.00148284	16891	8	110968	TCD1	36460	15	172102	IRA2
116	-0.00147246	36255	15	151997	HAL9	38226	15	521781	RGS2
117	0.00146507	18393	9	65121	MLP2	30675	13	29994	ndi1
118	0.00146451	5318	4	51735	GCS1	10491	5	379363	KAP123
119	-0.00146439	30675	13	29994	ndi1	40716	16	462071	mnn9
120	0.00144304	13302	7	128174	MDS3	30755	13	49008	BUL2
121	0.00143708	8817	4	1462837	GIN4	30854	13	67103	NUP188
122	0.00142822	3155	2	497569	HSL7	36255	15	151997	HAL9
123	0.0014163	217	1	40914	GPB2	27648	12	496834	SEC10
124	-0.00141429	2613	2	409265	TEC1	34744	14	467214	MKT1
125	0.00141268	9780	5	83617	ANP1	27628	12	442614	PCD1
126	-0.00140072	2968	2	463267	CYC8	37710	15	460430	NRT1
127	0.00138256	14189	7	399014	OLE1	28362	12	674198	nej1
128	-0.00137243	217	1	40914	GPB2	13302	7	128174	MDS3
129	0.00135694	37710	15	460430	NRT1	38760	15	624091	PDR5
130	-0.00134672	27951	12	570675	fre1	28226	12	650766	HAP1
131	-0.0013412	7120	4	538174	ENA1	34744	14	467214	MKT1
132	0.00133748	27605	12	407846	USB1	34766	14	487930	MLF3
133	-0.00132983	8458	4	1350137	ydr444w	27648	12	496834	SEC10
134	-0.00132772	15807	7	953711	phb2	28226	12	650766	HAP1
135	0.00132477	13302	7	128174	MDS3	27648	12	496834	SEC10
136	0.00130525	27648	12	496834	SEC10	38760	15	624091	PDR5
137	0.00129959	10097	5	222671	ARB1	40936	16	502085	SKS1
138	-0.00129867	217	1	40914	GPB2	28898	12	755552	CDC25
139	0.00128253	25752	11	532745	MRS4	30675	13	29994	ndi1
140	-0.00128156	29212	12	797756	NUP2	37710	15	460430	NRT1
141	0.00127387	24450	11	227628	ABF1	34704	14	442643	rps7b
142	-0.00127371	13302	7	128174	MDS3	32087	13	391443	SEN15
143	-0.00127217	13302	7	128174	MDS3	21951	10	426287	CYR1
144	0.00126526	36460	15	172102	IRA2	39743	16	75046	atg41
145	0.00126145	13302	7	128174	MDS3	26762	12	112356	dps1
146	0.00125349	21951	10	426287	CYR1	30190	12	947536	CTR3
147	-0.00124757	34074	14	185843	VPS75	37646	15	448221	CYT1
148	0.00124586	26333	11	642733	sir1	27648	12	496834	SEC10
149	0.00124223	26583	12	81096	fra1	28226	12	650766	HAP1
150	0.00123074	18880	9	164335	PFK26	36460	15	172102	IRA2
151	-0.00122592	6753	4	328957	AHK1	33591	13	915747	fet4
152	0.00122422	16891	8	110968	TCD1	30316	12	969879	DCK1
153	-0.00122025	217	1	40914	GPB2	21951	10	426287	CYR1
154	0.00121538	21414	10	326293	BIT61	34744	14	467214	MKT1
155	0.00120932	23975	11	136785	ykl165c-a	30755	13	49008	BUL2
156	0.00120687	3155	2	497569	HSL7	40936	16	502085	SKS1
157	0.00120522	34074	14	185843	VPS75	36460	15	172102	IRA2
158	-0.00120164	10097	5	222671	ARB1	24450	11	227628	ABF1
159	-0.00120108	2968	2	463267	CYC8	31936	13	331334	RSF1
160	-0.00119028	33427	13	878991	YMR304C-A	37352	15	411283	WHI2
161	-0.00118971	3155	2	497569	HSL7	23975	11	136785	ykl165c-a
162	-0.00118887	9930	5	194649	GPA2	31936	13	331334	RSF1
163	0.00118527	29840	12	871151	VID22	30755	13	49008	BUL2
164	-0.0011832	3155	2	497569	HSL7	13302	7	128174	MDS3
165	-0.00117675	7120	4	538174	ENA1	30658	13	25025	PHO84
166	-0.00117085	14098	7	369600	HSF1	33591	13	915747	fet4
167	0.00116077	6753	4	328957	AHK1	36255	15	151997	HAL9
168	-0.00115687	10491	5	379363	KAP123	22937	10	656568	VPS70
169	-0.00115385	1801	2	231704	UTP20	22937	10	656568	VPS70
170	0.00114876	33591	13	915747	fet4	34074	14	185843	VPS75
171	-0.00113702	10372	5	301558	vtc1	32087	13	391443	SEN15
172	-0.00113388	901	1	195872	SWH1	36460	15	172102	IRA2
173	-0.00112167	18393	9	65121	MLP2	29571	12	824405	KAP95
174	0.00112116	6753	4	328957	AHK1	22937	10	656568	VPS70
175	-0.0011175	1801	2	231704	UTP20	37710	15	460430	NRT1
176	-0.00111575	15807	7	953711	phb2	21951	10	426287	CYR1
177	-0.00111543	35739	15	66022	BSC6	36460	15	172102	IRA2
178	-0.00111056	3459	2	536667	tbs1	30316	12	969879	DCK1
179	0.00110239	10491	5	379363	KAP123	18393	9	65121	MLP2
180	0.00110014	28773	12	728726	exg1	34074	14	185843	VPS75
181	0.00109711	33591	13	915747	fet4	36460	15	172102	IRA2
182	0.00109441	16891	8	110968	TCD1	18994	9	195664	YIL089W
183	0.00109392	18880	9	164335	PFK26	30854	13	67103	NUP188
184	-0.00109295	26885	12	135855	LMO1	30658	13	25025	PHO84
185	0.00109188	10372	5	301558	vtc1	30675	13	29994	ndi1
186	-0.00109179	8258	4	1197839	TFC6	29212	12	797756	NUP2
187	-0.00109004	217	1	40914	GPB2	23975	11	136785	ykl165c-a
188	-0.00108636	10372	5	301558	vtc1	36586	15	201792	HST1
189	-0.00107067	27547	12	369484	ahp1	41041	16	514987	VTC3
190	0.00106094	27628	12	442614	PCD1	34744	14	467214	MKT1
191	-0.00105619	8817	4	1462837	GIN4	34704	14	442643	rps7b
192	0.00105381	25016	11	356202	mmo1	34770	14	495913	FKH2
193	-0.0010531	34766	14	487930	MLF3	38226	15	521781	RGS2
194	0.00105248	3155	2	497569	HSL7	38226	15	521781	RGS2
195	0.00105102	27648	12	496834	SEC10	30190	12	947536	CTR3
196	-0.00105002	30854	13	67103	NUP188	33138	13	721591	ymr226c
197	-0.0010466	468	1	112742	CCR4	21414	10	326293	BIT61
198	0.00104619	9852	5	158527	FMP52	22343	10	522284	TAH11
199	0.00104094	13302	7	128174	MDS3	40936	16	502085	SKS1
200	-0.00103855	28092	12	617705	VPS34	35739	15	66022	BSC6
201	-0.00103121	27951	12	570675	fre1	33591	13	915747	fet4
202	0.00102628	9930	5	194649	GPA2	34744	14	467214	MKT1
203	-0.0010259	22937	10	656568	VPS70	40103	16	207437	TCO89
204	0.00101941	18393	9	65121	MLP2	40936	16	502085	SKS1
205	-0.00101167	30755	13	49008	BUL2	38226	15	521781	RGS2
206	-0.00100702	217	1	40914	GPB2	32087	13	391443	SEN15
207	0.00100659	7084	4	507180	mrh1	18393	9	65121	MLP2
208	0.00100067	9930	5	194649	GPA2	26885	12	135855	LMO1
209	-0.000995281	16891	8	110968	TCD1	33591	13	915747	fet4
210	-0.000985737	32087	13	391443	SEN15	33427	13	878991	YMR304C-A
211	0.000978453	5260	3	283811	ycr097w-a	30190	12	947536	CTR3
212	0.000965157	217	1	40914	GPB2	26885	12	135855	LMO1
213	-0.000964822	6753	4	328957	AHK1	9930	5	194649	GPA2
214	0.000961712	37710	15	460430	NRT1	40103	16	207437	TCO89
215	0.000961015	13302	7	128174	MDS3	29840	12	871151	VID22
216	0.000956786	20950	10	126877	SSY5	36255	15	151997	HAL9
217	-0.000953327	38226	15	521781	RGS2	39542	15	966135	yor342c
218	-0.000949811	17497	8	298948	sfb3	35739	15	66022	BSC6
219	-0.000944598	18393	9	65121	MLP2	32087	13	391443	SEN15
220	-0.000942402	468	1	112742	CCR4	31936	13	331334	RSF1
221	0.000913103	5840	4	147362	DLD1	17141	8	162835	RPN1
222	-0.000911051	217	1	40914	GPB2	3459	2	536667	tbs1
223	-0.000903571	19221	9	252105	YIL055C	33427	13	878991	YMR304C-A
224	0.000893918	2968	2	463267	CYC8	7275	4	589875	IPT1
225	-0.00149381	5316	4	45363	SSB1	37352	15	411283	WHI2
226	-0.00188839	5316	4	45363	SSB1	40936	16	502085	SKS1
227	0.00217002	5316	4	45363	SSB1	22937	10	656568	VPS70
228	0.00224546	5316	4	45363	SSB1	31936	13	331334	RSF1
229	0.00241687	5260	3	283811	ycr097w-a	5316	4	45363	SSB1
230	0.00295581	5316	4	45363	SSB1	37849	15	479709	WHI5
231	-0.00320412	5316	4	45363	SSB1	27951	12	570675	fre1
232	-0.00326643	5316	4	45363	SSB1	29840	12	871151	VID22
233	0.00397251	5316	4	45363	SSB1	30190	12	947536	CTR3
234	0.00432197	5316	4	45363	SSB1	27648	12	496834	SEC10
235	-0.00436676	5316	4	45363	SSB1	37710	15	460430	NRT1
236	0.00524141	5316	4	45363	SSB1	30658	13	25025	PHO84
237	0.00677803	5316	4	45363	SSB1	36255	15	151997	HAL9
238	0.00682089	9518	5	34493	NPR2	37352	15	411283	WHI2
239	-0.00683513	9518	5	34493	NPR2	35739	15	66022	BSC6
240	0.00701661	9518	5	34493	NPR2	25227	11	396472	CDC16
241	0.00705979	5316	4	45363	SSB1	28226	12	650766	HAP1
242	-0.0075575	9518	5	34493	NPR2	22343	10	522284	TAH11
243	0.0080247	8458	4	1350137	ydr444w	9518	5	34493	NPR2
244	-0.00819408	9518	5	34493	NPR2	36460	15	172102	IRA2
245	-0.00836882	5316	4	45363	SSB1	36460	15	172102	IRA2
246	-0.00852558	9518	5	34493	NPR2	30190	12	947536	CTR3
247	0.00864573	5316	4	45363	SSB1	34744	14	467214	MKT1
248	-0.00867848	7084	4	507180	mrh1	9518	5	34493	NPR2
249	-0.00942197	9518	5	34493	NPR2	27628	12	442614	PCD1
250	-0.010901	9518	5	34493	NPR2	26583	12	81096	fra1
251	0.0114527	4845	3	79867	KCC4	9518	5	34493	NPR2
252	-0.0123275	9518	5	34493	NPR2	34704	14	442643	rps7b
253	-0.0133884	9518	5	34493	NPR2	30755	13	49008	BUL2
254	0.0180022	9518	5	34493	NPR2	36586	15	201792	HST1
255	-0.0223471	9518	5	34493	NPR2	28226	12	650766	HAP1

## Sheet: 30C_additive
QTL	Effect Size	Lead SNP Index	Chromosome	Lead SNP Position	Lead SNP Gene
1	-0.0106377	36455	15	171671	IRA2
2	0.010421	34744	14	467214	MKT1
3	-0.00804204	26882	12	134351	LMO1
4	-0.0059731	36255	15	151997	HAL9
5	-0.00543835	33591	13	915747	fet4
6	0.00524048	28898	12	755552	CDC25
7	0.00484514	5322	4	52556	SHS1
8	-0.00480926	18407	9	66681	MLP2
9	-0.00458734	2423	2	379969	alg14
10	0.004139	34703	14	442513	rps7b
11	-0.00394833	36563	15	184291	AVO1
12	0.00383842	28368	12	674876	NEJ1
13	-0.00340414	34770	14	495913	FKH2
14	0.00332301	35756	15	67526	pfk27
15	0.00321208	37357	15	411919	WHI2
16	0.00304275	30135	12	921442	BDF1
17	-0.00300998	28852	12	748235	CDA2
18	-0.00294271	30785	13	53537	ZDS2
19	0.00286053	13306	7	128542	MDS3
20	-0.00282833	2770	2	429361	pho5
21	0.00277699	28774	12	729241	EXG1
22	-0.00272188	7120	4	538174	ENA1
23	0.0026959	7487	4	721119	YDR133C
24	0.00267748	34322	14	268395	WHI3
25	-0.00259726	30755	13	49008	BUL2
26	-0.00253376	18606	9	95341	VHS2
27	0.00253209	30658	13	25025	PHO84
28	-0.00252555	467	1	112549	CCR4
29	0.00240061	8258	4	1197839	TFC6
30	0.00239116	23985	11	138466	MCD4
31	0.00236122	4237	2	645028	NGR1
32	0.00235309	10556	5	417695	SAK1
33	-0.00232204	8814	4	1462657	GIN4
34	-0.00229492	2968	2	463267	CYC8
35	0.00228137	1129	2	119103	TOD6
36	0.00225886	37710	15	460430	NRT1
37	-0.00216197	39624	15	1004678	gds1
38	-0.0021388	40936	16	502085	SKS1
39	-0.00208727	37643	15	447362	cyt1
40	0.00208628	30190	12	947536	CTR3
41	-0.00207399	5940	4	164013	FAP7
42	0.00206906	34816	14	507053	YDJ1
43	-0.00204466	37842	15	477914	TGL5
44	-0.00187662	7424	4	664414	SPO71
45	0.0018708	27645	12	495806	SEC10
46	-0.00186302	30676	13	30827	YML119W
47	-0.00183013	39255	15	840736	RIM20
48	0.00178036	7451	4	694335	dpb4
49	-0.00174456	26334	11	643665	sir1
50	0.00173079	28226	12	650766	HAP1
51	0.00172491	17986	8	479205	KOG1
52	-0.00171254	25406	11	428425	LAC1
53	0.00169364	34074	14	185843	VPS75
54	-0.00166655	25016	11	356202	mmo1
55	-0.0016641	21296	10	248329	BCK1
56	0.00165306	26850	12	122696	PUF3
57	-0.0016036	15108	7	797305	GTO1
58	-0.00159637	40103	16	207437	TCO89
59	0.00151691	2857	2	450018	YMC2
60	-0.00144008	19576	9	339505	FAA3
61	-0.00141453	34692	14	418797	ynl109w
62	-0.00140147	3452	2	535807	ARA1
63	0.00139289	34591	14	400970	ynl120c
64	0.00138539	34366	14	299000	PBR1
65	-0.00137764	32786	13	578132	HLJ1
66	0.00134208	30854	13	67103	NUP188
67	0.00128467	24466	11	230445	kti12
68	0.00125671	22309	10	516436	pol32
69	0.00125339	4953	3	146289	HSP30
70	0.00124379	22058	10	455563	met3
71	0.00120578	31015	13	93860	UFO1
72	-0.00118876	6878	4	421542	osh2
73	-0.00118294	31936	13	331334	RSF1
74	-0.00118043	906	1	196423	swh1
75	0.00115772	35311	14	713663	mso1
76	-0.00115149	12304	6	212121	PTR3
77	-0.00112777	24327	11	211954	SSH4
78	-0.00112497	39458	15	892001	sly41
79	-0.00112316	5244	3	268213	MSH3
80	-0.00111174	14213	7	408716	TIF4632
81	-0.00109855	25227	11	396472	CDC16
82	0.00109503	217	1	40914	GPB2
83	0.00108991	34765	14	487813	MLF3
84	0.00108302	5052	3	215932	YCR061W
85	0.00107599	10739	5	498966	SPT2
86	0.00107016	22941	10	658095	VPS70
87	-0.00106991	4853	3	82365	ycl022c
88	-0.001068	16920	8	122051	erg11
89	-0.00106281	17497	8	298948	sfb3
90	0.00104189	27550	12	369645	ccw12
91	-0.00102505	5839	4	147092	DLD1
92	0.0010183	14100	7	369881	HSF1
93	0.00101806	19818	9	397977	MRS1
94	0.00101671	1010	2	23441	RTG3
95	0.000997831	4780	3	50477	YCL041C
96	-0.00099038	38226	15	521781	RGS2
97	-0.000978621	18861	9	154390	HOS4
98	-0.000977844	8311	4	1257384	YDR391C
99	0.00094235	21430	10	328739	IKS1
100	-0.00093953	27962	12	572185	CPR6
101	0.000935728	20964	10	128925	SSY5
102	0.000927953	6162	4	210091	RPO21
103	0.000927236	30317	12	970287	DCK1
104	0.000922451	18645	9	101771	FKH1
105	0.000904523	36713	15	234020	spe2
106	-0.000891842	9001	4	1491891	RBA50
107	-0.000878212	40721	16	462497	DIG1
108	0.000850975	12846	7	36448	PDE1
109	0.000836214	35102	14	611506	SPO1
110	0.00082648	18877	9	161741	YIL108W
111	0.000817756	33241	13	820446	FCP1
112	0.000805332	25809	11	548067	dyn1
113	0.000747952	30027	12	900300	STE23
114	0.00074388	10312	5	267881	rpl34a
115	-0.00073531	34028	14	118246	MET2
116	0.000706573	38387	15	558912	cat5
117	0.000693656	2578	2	405667	spt7
118	0.000692355	7848	4	906491	MFB1
119	-0.000686075	15875	7	959010	pho81
120	0.000685525	28263	12	660915	GSY2
121	-0.000657282	39689	16	26510	pbi1
122	-0.000634438	16556	8	51314	RIM101
123	-0.000630316	29083	12	788349	CHS5
124	0.000606267	17166	8	165865	DAP2
125	-0.000597149	14774	7	551356	GSC2
126	0.000594748	40409	16	368067	eeb1
127	0.000583235	39760	16	82484	gal4
128	-0.000558683	21035	10	149101	YAK1
129	0.00052626	17380	8	218716	CPR2
130	0.000519082	31309	13	159532	SML1
131	-0.000514044	3149	2	497001	agp2
132	-0.000503272	15639	7	910992	CIR1
133	-0.000495132	26505	12	61318	VPS13
134	-0.000465724	26874	12	129764	PSR1
135	-0.000439099	29795	12	861301	SSQ1
136	0.0004094	41298	16	694512	TKL1
137	0.000400865	10384	5	327428	ILV1
138	0.000366373	6367	4	242997	UBP1
139	0.000354976	9929	5	194432	GPA2
140	0.000353848	20269	10	30890	yjl213w
141	-0.00035002	10097	5	222671	ARB1
142	0.00034441	1801	2	231704	UTP20
143	-0.00033892	8104	4	1062038	PRO1
144	0.000338766	27717	12	507074	CBF5
145	-0.000310072	29571	12	824405	KAP95
146	0.000309545	27135	12	258651	SHM2
147	0.000273213	21951	10	426287	CYR1
148	0.000270072	41082	16	526389	HST2
149	-0.000217535	16890	8	110019	tcd1
150	0.000214884	7276	4	590328	IPT1
151	0.000188725	9852	5	158527	FMP52
152	-0.000155645	27628	12	442614	PCD1
153	-0.00013925	14009	7	323836	srm1
154	-0.000119599	8458	4	1350137	ydr444w
155	-0.00011061	17816	8	426348	DNA2
156	-7.46769e-05	38652	15	607609	MDM32
157	2.03252e-05	7087	4	507718	mrh1
158	-0.0149152	5317	4	46068	ydl228c
159	0.0253471	9515	5	34040	npr2

## Sheet: 30C_epistatic
QTL	Effect	Lead SNP 1 Index	Chromosome 1	Lead SNP 1 Position	Lead SNP 1 Gene	Lead SNP 2 Index	Chromosome 2	Lead SNP 2 Position	Lead SNP 2 Gene
1	0.00610398	36455	15	171671	IRA2	36563	15	184291	AVO1
2	0.00573586	26874	12	129764	PSR1	26882	12	134351	LMO1
3	-0.00556036	34744	14	467214	MKT1	37710	15	460430	NRT1
4	-0.00529641	5322	4	52556	SHS1	34744	14	467214	MKT1
5	-0.00519337	5322	4	52556	SHS1	28226	12	650766	HAP1
6	-0.00517848	30755	13	49008	BUL2	36255	15	151997	HAL9
7	0.0047334	3452	2	535807	ARA1	36455	15	171671	IRA2
8	0.00465759	9929	5	194432	GPA2	36455	15	171671	IRA2
9	-0.00458592	36255	15	151997	HAL9	36563	15	184291	AVO1
10	0.00432369	26334	11	643665	sir1	37710	15	460430	NRT1
11	0.00421047	22941	10	658095	VPS70	31936	13	331334	RSF1
12	-0.00413027	30658	13	25025	PHO84	36455	15	171671	IRA2
13	0.00409315	31936	13	331334	RSF1	36255	15	151997	HAL9
14	-0.00399317	36455	15	171671	IRA2	40936	16	502085	SKS1
15	0.0039264	30190	12	947536	CTR3	33591	13	915747	fet4
16	0.00381614	28226	12	650766	HAP1	36255	15	151997	HAL9
17	0.00372242	30755	13	49008	BUL2	34744	14	467214	MKT1
18	-0.00367855	3452	2	535807	ARA1	28263	12	660915	GSY2
19	0.00343482	2423	2	379969	alg14	30785	13	53537	ZDS2
20	0.00340891	217	1	40914	GPB2	36455	15	171671	IRA2
21	0.00331999	13306	7	128542	MDS3	36255	15	151997	HAL9
22	0.00325814	28226	12	650766	HAP1	34765	14	487813	MLF3
23	-0.00318936	7276	4	590328	IPT1	36255	15	151997	HAL9
24	0.00318052	22941	10	658095	VPS70	28226	12	650766	HAP1
25	0.00307382	217	1	40914	GPB2	30658	13	25025	PHO84
26	0.00298041	22941	10	658095	VPS70	34744	14	467214	MKT1
27	0.00293843	28226	12	650766	HAP1	30755	13	49008	BUL2
28	-0.00288304	26882	12	134351	LMO1	36455	15	171671	IRA2
29	-0.00283234	28226	12	650766	HAP1	37357	15	411919	WHI2
30	0.0028022	28226	12	650766	HAP1	30190	12	947536	CTR3
31	0.00276516	27550	12	369645	ccw12	34744	14	467214	MKT1
32	0.00274187	31936	13	331334	RSF1	34744	14	467214	MKT1
33	0.00272651	22941	10	658095	VPS70	30785	13	53537	ZDS2
34	0.00269536	9929	5	194432	GPA2	30658	13	25025	PHO84
35	0.00261862	14213	7	408716	TIF4632	34744	14	467214	MKT1
36	0.00260839	18645	9	101771	FKH1	36255	15	151997	HAL9
37	-0.00252796	5322	4	52556	SHS1	27628	12	442614	PCD1
38	0.00252437	3452	2	535807	ARA1	30755	13	49008	BUL2
39	0.00252021	27645	12	495806	SEC10	34744	14	467214	MKT1
40	0.00247442	21951	10	426287	CYR1	28226	12	650766	HAP1
41	-0.00247037	31015	13	93860	UFO1	36255	15	151997	HAL9
42	0.00245238	28226	12	650766	HAP1	30658	13	25025	PHO84
43	-0.00240131	5322	4	52556	SHS1	30190	12	947536	CTR3
44	0.00234676	26874	12	129764	PSR1	28263	12	660915	GSY2
45	0.00234494	21951	10	426287	CYR1	36255	15	151997	HAL9
46	-0.00232384	30755	13	49008	BUL2	34765	14	487813	MLF3
47	0.00231179	5244	3	268213	MSH3	34744	14	467214	MKT1
48	0.00231116	467	1	112549	CCR4	34744	14	467214	MKT1
49	-0.00230245	27628	12	442614	PCD1	37710	15	460430	NRT1
50	0.00228828	10097	5	222671	ARB1	36255	15	151997	HAL9
51	-0.00222809	2578	2	405667	spt7	30785	13	53537	ZDS2
52	0.00218536	8814	4	1462657	GIN4	30755	13	49008	BUL2
53	0.00214609	16890	8	110019	tcd1	34703	14	442513	rps7b
54	0.00212545	217	1	40914	GPB2	14213	7	408716	TIF4632
55	0.00211064	30317	12	970287	DCK1	36255	15	151997	HAL9
56	0.00203409	9929	5	194432	GPA2	27628	12	442614	PCD1
57	-0.00203209	5322	4	52556	SHS1	30755	13	49008	BUL2
58	0.00199525	5322	4	52556	SHS1	27962	12	572185	CPR6
59	0.00199166	27962	12	572185	CPR6	30190	12	947536	CTR3
60	0.00199072	13306	7	128542	MDS3	27645	12	495806	SEC10
61	-0.00198388	28368	12	674876	NEJ1	37710	15	460430	NRT1
62	-0.00197793	906	1	196423	swh1	10384	5	327428	ILV1
63	0.0019498	2423	2	379969	alg14	2770	2	429361	pho5
64	-0.00194047	8458	4	1350137	ydr444w	28226	12	650766	HAP1
65	-0.00193313	9929	5	194432	GPA2	13306	7	128542	MDS3
66	0.0019137	24466	11	230445	kti12	36563	15	184291	AVO1
67	-0.00189807	26882	12	134351	LMO1	30676	13	30827	YML119W
68	0.00187763	14009	7	323836	srm1	34703	14	442513	rps7b
69	0.00184406	27628	12	442614	PCD1	34744	14	467214	MKT1
70	-0.00182657	10556	5	417695	SAK1	22941	10	658095	VPS70
71	0.00181676	36563	15	184291	AVO1	39760	16	82484	gal4
72	0.00181281	9929	5	194432	GPA2	28226	12	650766	HAP1
73	0.00181081	24327	11	211954	SSH4	30676	13	30827	YML119W
74	-0.00181032	27962	12	572185	CPR6	28263	12	660915	GSY2
75	-0.00180024	25016	11	356202	mmo1	36563	15	184291	AVO1
76	0.00179255	34322	14	268395	WHI3	36455	15	171671	IRA2
77	0.00178737	18407	9	66681	MLP2	30785	13	53537	ZDS2
78	-0.00177493	2578	2	405667	spt7	34744	14	467214	MKT1
79	-0.00177368	22941	10	658095	VPS70	36563	15	184291	AVO1
80	0.00176652	3149	2	497001	agp2	36255	15	151997	HAL9
81	0.00176638	34703	14	442513	rps7b	38652	15	607609	MDM32
82	0.00176368	28368	12	674876	NEJ1	38387	15	558912	cat5
83	0.00176027	18407	9	66681	MLP2	18606	9	95341	VHS2
84	0.00175597	28226	12	650766	HAP1	31936	13	331334	RSF1
85	-0.00174807	27717	12	507074	CBF5	36255	15	151997	HAL9
86	-0.00174802	217	1	40914	GPB2	9929	5	194432	GPA2
87	0.0017299	30785	13	53537	ZDS2	31015	13	93860	UFO1
88	0.00170527	27645	12	495806	SEC10	28226	12	650766	HAP1
89	0.00169852	16890	8	110019	tcd1	27717	12	507074	CBF5
90	0.00169024	6878	4	421542	osh2	7087	4	507718	mrh1
91	-0.00168323	9929	5	194432	GPA2	31936	13	331334	RSF1
92	-0.00167763	3452	2	535807	ARA1	31936	13	331334	RSF1
93	0.00167359	23985	11	138466	MCD4	36255	15	151997	HAL9
94	-0.00167041	34703	14	442513	rps7b	36255	15	151997	HAL9
95	0.00166682	5322	4	52556	SHS1	29571	12	824405	KAP95
96	-0.00165742	28226	12	650766	HAP1	41082	16	526389	HST2
97	0.00165647	3149	2	497001	agp2	3452	2	535807	ARA1
98	-0.0016481	217	1	40914	GPB2	10556	5	417695	SAK1
99	-0.00163354	10556	5	417695	SAK1	34744	14	467214	MKT1
100	0.00159198	217	1	40914	GPB2	27645	12	495806	SEC10
101	-0.0015799	15875	7	959010	pho81	28263	12	660915	GSY2
102	0.00157163	27550	12	369645	ccw12	28226	12	650766	HAP1
103	-0.0015713	217	1	40914	GPB2	13306	7	128542	MDS3
104	0.00156932	14774	7	551356	GSC2	36255	15	151997	HAL9
105	0.00156237	18877	9	161741	YIL108W	22941	10	658095	VPS70
106	0.00155161	10556	5	417695	SAK1	36455	15	171671	IRA2
107	-0.0015442	28898	12	755552	CDC25	37710	15	460430	NRT1
108	-0.00154378	36255	15	151997	HAL9	40721	16	462497	DIG1
109	-0.00153387	26850	12	122696	PUF3	34744	14	467214	MKT1
110	0.00152745	20964	10	128925	SSY5	36255	15	151997	HAL9
111	-0.00151751	30676	13	30827	YML119W	38226	15	521781	RGS2
112	0.00151158	14774	7	551356	GSC2	34744	14	467214	MKT1
113	0.00150679	24327	11	211954	SSH4	28226	12	650766	HAP1
114	-0.00150638	2968	2	463267	CYC8	37710	15	460430	NRT1
115	0.00150614	36455	15	171671	IRA2	37643	15	447362	cyt1
116	0.0015046	27628	12	442614	PCD1	31936	13	331334	RSF1
117	0.00149668	13306	7	128542	MDS3	30785	13	53537	ZDS2
118	0.00147162	26334	11	643665	sir1	34770	14	495913	FKH2
119	0.00146403	6367	4	242997	UBP1	22941	10	658095	VPS70
120	-0.00146285	3149	2	497001	agp2	34744	14	467214	MKT1
121	-0.00146234	3149	2	497001	agp2	13306	7	128542	MDS3
122	0.00146032	26334	11	643665	sir1	28226	12	650766	HAP1
123	0.00145736	5839	4	147092	DLD1	30854	13	67103	NUP188
124	-0.00144755	22941	10	658095	VPS70	40103	16	207437	TCO89
125	0.00144349	22941	10	658095	VPS70	25406	11	428425	LAC1
126	-0.00143455	18861	9	154390	HOS4	34744	14	467214	MKT1
127	-0.00141736	35756	15	67526	pfk27	36563	15	184291	AVO1
128	-0.00141729	21035	10	149101	YAK1	37357	15	411919	WHI2
129	0.00141567	13306	7	128542	MDS3	30658	13	25025	PHO84
130	-0.00140702	34816	14	507053	YDJ1	38387	15	558912	cat5
131	0.00139271	9929	5	194432	GPA2	40936	16	502085	SKS1
132	0.00139155	13306	7	128542	MDS3	40936	16	502085	SKS1
133	-0.00137882	8258	4	1197839	TFC6	29083	12	788349	CHS5
134	0.00137826	27135	12	258651	SHM2	34765	14	487813	MLF3
135	-0.00136629	34744	14	467214	MKT1	40721	16	462497	DIG1
136	0.00134733	9929	5	194432	GPA2	26874	12	129764	PSR1
137	0.0013383	30658	13	25025	PHO84	40103	16	207437	TCO89
138	-0.00133626	17380	8	218716	CPR2	36455	15	171671	IRA2
139	-0.00131848	17380	8	218716	CPR2	34744	14	467214	MKT1
140	0.00131506	31015	13	93860	UFO1	31309	13	159532	SML1
141	0.00131258	25016	11	356202	mmo1	34765	14	487813	MLF3
142	-0.0013121	13306	7	128542	MDS3	21951	10	426287	CYR1
143	-0.00131096	3452	2	535807	ARA1	23985	11	138466	MCD4
144	0.00130503	29795	12	861301	SSQ1	41298	16	694512	TKL1
145	-0.00129534	9929	5	194432	GPA2	37357	15	411919	WHI2
146	0.00129077	8104	4	1062038	PRO1	36255	15	151997	HAL9
147	0.00128855	13306	7	128542	MDS3	26850	12	122696	PUF3
148	-0.00128641	13306	7	128542	MDS3	37357	15	411919	WHI2
149	0.00126489	10556	5	417695	SAK1	18877	9	161741	YIL108W
150	0.00125899	16890	8	110019	tcd1	30317	12	970287	DCK1
151	0.00125599	6878	4	421542	osh2	27717	12	507074	CBF5
152	-0.00125225	8104	4	1062038	PRO1	37710	15	460430	NRT1
153	0.00124785	906	1	196423	swh1	28263	12	660915	GSY2
154	-0.00123952	28226	12	650766	HAP1	35756	15	67526	pfk27
155	-0.00123924	13306	7	128542	MDS3	31936	13	331334	RSF1
156	0.00123648	217	1	40914	GPB2	26882	12	134351	LMO1
157	-0.00122999	26882	12	134351	LMO1	40721	16	462497	DIG1
158	0.00122774	26334	11	643665	sir1	27717	12	507074	CBF5
159	0.0012235	27717	12	507074	CBF5	30317	12	970287	DCK1
160	-0.00122304	7276	4	590328	IPT1	34744	14	467214	MKT1
161	-0.00122241	8458	4	1350137	ydr444w	27645	12	495806	SEC10
162	0.00122137	33591	13	915747	fet4	34322	14	268395	WHI3
163	0.00122108	36455	15	171671	IRA2	38652	15	607609	MDM32
164	0.00122084	17816	8	426348	DNA2	30755	13	49008	BUL2
165	0.00122056	7120	4	538174	ENA1	18407	9	66681	MLP2
166	0.00121493	5244	3	268213	MSH3	28226	12	650766	HAP1
167	0.0012051	22941	10	658095	VPS70	32786	13	578132	HLJ1
168	-0.00120255	28263	12	660915	GSY2	29795	12	861301	SSQ1
169	0.00120035	21430	10	328739	IKS1	34744	14	467214	MKT1
170	0.00120013	8104	4	1062038	PRO1	9852	5	158527	FMP52
171	0.00119763	16890	8	110019	tcd1	30676	13	30827	YML119W
172	0.00119338	34765	14	487813	MLF3	35102	14	611506	SPO1
173	0.00118987	24466	11	230445	kti12	26850	12	122696	PUF3
174	0.00117651	30676	13	30827	YML119W	31936	13	331334	RSF1
175	0.00117649	5839	4	147092	DLD1	17166	8	165865	DAP2
176	0.0011702	29083	12	788349	CHS5	36563	15	184291	AVO1
177	-0.00116847	7276	4	590328	IPT1	28226	12	650766	HAP1
178	-0.00116658	906	1	196423	swh1	36455	15	171671	IRA2
179	0.00116657	5839	4	147092	DLD1	34744	14	467214	MKT1
180	0.00116406	14100	7	369881	HSF1	30027	12	900300	STE23
181	-0.00115919	217	1	40914	GPB2	37357	15	411919	WHI2
182	-0.00114938	14100	7	369881	HSF1	22941	10	658095	VPS70
183	0.00113585	10556	5	417695	SAK1	19576	9	339505	FAA3
184	-0.00113242	1129	2	119103	TOD6	30658	13	25025	PHO84
185	-0.00111941	25016	11	356202	mmo1	38226	15	521781	RGS2
186	-0.00111458	7120	4	538174	ENA1	10384	5	327428	ILV1
187	0.00110186	2770	2	429361	pho5	7276	4	590328	IPT1
188	-0.00110069	217	1	40914	GPB2	3149	2	497001	agp2
189	-0.00110027	2423	2	379969	alg14	31309	13	159532	SML1
190	0.00109845	37710	15	460430	NRT1	39255	15	840736	RIM20
191	-0.0010949	10556	5	417695	SAK1	34074	14	185843	VPS75
192	0.00109255	13306	7	128542	MDS3	35756	15	67526	pfk27
193	0.00108563	9929	5	194432	GPA2	21951	10	426287	CYR1
194	0.00108309	13306	7	128542	MDS3	28263	12	660915	GSY2
195	-0.00108145	16556	8	51314	RIM101	29795	12	861301	SSQ1
196	0.00107862	906	1	196423	swh1	9929	5	194432	GPA2
197	0.00106431	1801	2	231704	UTP20	34744	14	467214	MKT1
198	0.00106056	22058	10	455563	met3	27717	12	507074	CBF5
199	-0.00105604	15639	7	910992	CIR1	27628	12	442614	PCD1
200	-0.00105601	30317	12	970287	DCK1	34322	14	268395	WHI3
201	-0.00105304	5244	3	268213	MSH3	30755	13	49008	BUL2
202	-0.00104937	27645	12	495806	SEC10	40936	16	502085	SKS1
203	0.00104928	14100	7	369881	HSF1	28226	12	650766	HAP1
204	-0.00104903	217	1	40914	GPB2	34692	14	418797	ynl109w
205	0.00104329	10556	5	417695	SAK1	30755	13	49008	BUL2
206	0.0010419	10097	5	222671	ARB1	22941	10	658095	VPS70
207	0.00103851	20269	10	30890	yjl213w	30785	13	53537	ZDS2
208	-0.00103769	217	1	40914	GPB2	22058	10	455563	met3
209	-0.00102882	3452	2	535807	ARA1	9929	5	194432	GPA2
210	-0.00101422	8104	4	1062038	PRO1	22941	10	658095	VPS70
211	-0.00101292	1129	2	119103	TOD6	37710	15	460430	NRT1
212	-0.00101271	4237	2	645028	NGR1	30317	12	970287	DCK1
213	-0.00100752	14100	7	369881	HSF1	33591	13	915747	fet4
214	-0.00100695	7451	4	694335	dpb4	30676	13	30827	YML119W
215	0.00100694	7848	4	906491	MFB1	34744	14	467214	MKT1
216	-0.0010048	30755	13	49008	BUL2	34322	14	268395	WHI3
217	0.000998248	6878	4	421542	osh2	40721	16	462497	DIG1
218	0.000997899	26850	12	122696	PUF3	31936	13	331334	RSF1
219	0.000995407	3452	2	535807	ARA1	40721	16	462497	DIG1
220	-0.000994703	30190	12	947536	CTR3	30676	13	30827	YML119W
221	0.000986282	22941	10	658095	VPS70	38652	15	607609	MDM32
222	0.000956072	12304	6	212121	PTR3	30676	13	30827	YML119W
223	0.000930164	18645	9	101771	FKH1	40721	16	462497	DIG1
224	0.00169154	5317	4	46068	ydl228c	9929	5	194432	GPA2
225	0.00177564	5244	3	268213	MSH3	5317	4	46068	ydl228c
226	-0.0018044	5317	4	46068	ydl228c	40936	16	502085	SKS1
227	-0.00225708	5317	4	46068	ydl228c	37357	15	411919	WHI2
228	-0.00277738	5317	4	46068	ydl228c	27962	12	572185	CPR6
229	-0.00317435	5317	4	46068	ydl228c	29571	12	824405	KAP95
230	0.00330015	5317	4	46068	ydl228c	31936	13	331334	RSF1
231	0.00407918	5317	4	46068	ydl228c	30755	13	49008	BUL2
232	0.00414141	5317	4	46068	ydl228c	27628	12	442614	PCD1
233	0.00419627	9515	5	34040	npr2	16920	8	122051	erg11
234	0.00452961	5317	4	46068	ydl228c	22941	10	658095	VPS70
235	0.0045493	5317	4	46068	ydl228c	30190	12	947536	CTR3
236	-0.005511	5317	4	46068	ydl228c	34703	14	442513	rps7b
237	0.00606283	5317	4	46068	ydl228c	36255	15	151997	HAL9
238	0.00718073	9515	5	34040	npr2	36563	15	184291	AVO1
239	0.00719372	8458	4	1350137	ydr444w	9515	5	34040	npr2
240	0.00738786	5317	4	46068	ydl228c	28226	12	650766	HAP1
241	-0.00811999	5317	4	46068	ydl228c	36455	15	171671	IRA2
242	-0.0110679	9515	5	34040	npr2	26505	12	61318	VPS13
243	-0.0113258	9515	5	34040	npr2	34770	14	495913	FKH2
244	0.014221	5317	4	46068	ydl228c	34744	14	467214	MKT1
245	-0.0152497	9515	5	34040	npr2	30755	13	49008	BUL2
246	-0.0178615	9515	5	34040	npr2	28368	12	674876	NEJ1
247	0.01896	4953	3	146289	HSP30	9515	5	34040	npr2

## Sheet: 33C_additive
QTL	Effect Size	Lead SNP Index	Chromosome	Lead SNP Position	Lead SNP Gene
1	-0.014861	26883	12	134767	LMO1
2	0.0134726	22941	10	658095	VPS70
3	0.0126096	28226	12	650766	HAP1
4	0.0113691	34744	14	467214	MKT1
5	-0.0108611	36566	15	185793	brx1
6	-0.00981029	36460	15	172102	IRA2
7	0.00962164	5318	4	51735	GCS1
8	0.0075199	40397	16	356243	MSD1
9	0.00690325	34322	14	268395	WHI3
10	0.0067214	30189	12	940925	VIP1
11	-0.00671304	30756	13	49588	BUL2
12	0.00650697	39511	15	941215	MIP1
13	0.00602594	34765	14	487813	MLF3
14	0.00592105	34591	14	400970	ynl120c
15	0.00584565	30053	12	905770	ART10
16	0.00581058	284	1	50432	OAF1
17	-0.00571245	40936	16	502085	SKS1
18	0.00542213	21951	10	426287	CYR1
19	-0.00516673	39257	15	840862	RIM20
20	0.00485075	10520	5	398390	avt6
21	0.0048013	13305	7	128438	MDS3
22	-0.00463516	7277	4	590826	IPT1
23	-0.00450878	33590	13	915509	fet4
24	0.00440956	26873	12	129090	sof1
25	-0.00431834	18605	9	94908	om45
26	-0.00404	18407	9	66681	MLP2
27	-0.00395384	15608	7	907178	ADE3
28	-0.00385141	2443	2	383391	RDH54
29	-0.00376304	11492	6	73633	RIM15
30	0.00375683	27657	12	498920	rps31
31	-0.00375487	40686	16	451315	sur1
32	0.00373683	35751	15	67209	bsc6
33	-0.00358254	29571	12	824405	KAP95
34	0.00349628	7085	4	507490	mrh1
35	-0.00347513	41059	16	517743	CTF19
36	0.00339854	30658	13	25025	PHO84
37	0.00333984	1129	2	119103	TOD6
38	0.00310576	10048	5	210074	MIG3
39	-0.00300465	3453	2	536349	ARA1
40	0.00295188	38378	15	557021	UBP2
41	-0.00277074	39624	15	1004678	gds1
42	-0.00273668	21294	10	248169	BCK1
43	-0.00272925	19378	9	276747	GVP36
44	0.00268907	28898	12	755552	CDC25
45	0.00267934	24126	11	154735	ape2
46	0.00267568	18877	9	161741	YIL108W
47	0.00267383	11389	6	50685	FET5
48	-0.00265241	25016	11	356202	mmo1
49	0.00262438	20957	10	127843	SSY5
50	0.00261277	21430	10	328739	IKS1
51	-0.00259587	18861	9	154390	HOS4
52	-0.00255672	32193	13	425898	SEC14
53	0.0025545	10883	5	526674	RAD3
54	0.00254522	24730	11	265688	MBR1
55	-0.00249239	4853	3	82365	ycl022c
56	-0.00245492	34677	14	413680	DBP2
57	0.00240624	34366	14	299000	PBR1
58	0.00237298	6335	4	237186	CDC48
59	-0.00235193	8483	4	1372424	TOM1
60	-0.00230748	28368	12	674876	NEJ1
61	0.00230675	27628	12	442614	PCD1
62	-0.00225294	5500	4	83327	uga4
63	-0.00219661	16555	8	50351	WSC4
64	-0.00213207	32951	13	643985	SGS1
65	0.0021201	34062	14	169287	rtc4
66	0.00210789	9929	5	194432	GPA2
67	0.002067	23113	11	3224	ykl222c
68	0.00203904	1803	2	231943	UTP20
69	0.00200161	34700	14	442260	PHO23
70	0.00195265	17541	8	356284	ept1
71	-0.00193369	14189	7	399014	OLE1
72	0.00187708	26127	11	605065	TVP38
73	0.00187588	24443	11	227015	ABF1
74	0.00182089	22343	10	522284	TAH11
75	-0.00180128	21037	10	149212	YAK1
76	-0.00179569	39466	15	895003	SNU66
77	-0.00176517	8948	4	1484424	SPS2
78	0.00170501	16926	8	125769	tda3
79	0.00167354	28713	12	719105	GCD7
80	-0.00167062	11686	6	100382	YFL019C
81	0.00164848	7488	4	721283	YDR133C
82	-0.00164295	37846	15	479060	TGL5
83	0.00163895	17987	8	481333	IKI1
84	0.00162895	35144	14	629827	CIT1
85	0.00155726	33228	13	806573	rrn9
86	-0.00153313	10384	5	327428	ILV1
87	0.0015158	5213	3	251527	TUP1
88	-0.00147953	16850	8	102148	lag1
89	0.00141831	41301	16	695784	OPY2
90	-0.00141288	5771	4	129117	VMA1
91	0.00138138	13048	7	91652	VAM7
92	0.00136346	4782	3	50675	YCL042W
93	0.00136221	34195	14	214302	BNI4
94	-0.00128191	7118	4	527319	ena5
95	0.00125706	18635	9	101030	FKH1
96	0.00124809	30315	12	968901	DCK1
97	0.0012297	30356	12	994743	SEN1
98	-0.00121857	40319	16	288423	MKK2
99	0.00119757	19950	9	416078	mga2
100	0.00118569	4953	3	146289	HSP30
101	0.00117213	21286	10	230464	GSM1
102	-0.00117	15128	7	801751	PTI1
103	0.00116838	5051	3	214765	ycr061w
104	0.00109295	34861	14	529131	VAC7
105	0.00108377	38553	15	589882	arp8
106	-0.00105848	26504	12	56781	VPS13
107	0.00105179	17819	8	427164	DNA2
108	-0.00104745	34025	14	114144	CAF120
109	0.00101762	12831	7	25663	rtg2
110	-0.00101124	39689	16	26510	pbi1
111	0.000995917	1010	2	23441	RTG3
112	-0.000963211	34429	14	333901	CBK1
113	-0.000935657	16165	7	1022887	YGR266W
114	-0.000892338	32478	13	496640	YMR114C
115	-0.000875906	23515	11	56052	TOR2
116	0.000857082	20791	10	110053	TPK1
117	0.000851015	39760	16	82484	gal4
118	0.000822274	30854	13	67103	NUP188
119	0.000787058	20262	10	30579	yjl213w
120	0.000742526	8258	4	1197839	TFC6
121	-0.000676007	27546	12	369481	ahp1
122	0.000665774	36715	15	234124	spe2
123	0.000649151	10352	5	279033	GPP2
124	-0.000648979	31015	13	93860	UFO1
125	-0.000647728	8318	4	1261388	she9
126	-0.000645274	5950	4	165032	CDC9
127	-0.000564069	14975	7	701396	ygr107w
128	-0.000508919	17505	8	315448	BIG1
129	0.000483406	37349	15	411026	WHI2
130	-0.000464285	15807	7	953711	phb2
131	0.000434852	2969	2	463355	CYC8
132	-0.000317149	7409	4	637663	GIS1
133	-0.000315056	6844	4	386657	pus9
134	-0.000305492	5806	4	138482	PCL9
135	-0.000286264	5273	3	288418	git1
136	-0.000283776	33482	13	895661	ymr310c
137	0.000263674	31936	13	331334	RSF1
138	-0.000227805	906	1	196423	swh1
139	-0.000192679	38760	15	624091	PDR5
140	-0.000132222	37666	15	450923	MSA1
141	0.000117574	38224	15	521664	RGS2
142	-8.75088e-05	14101	7	370360	HSF1
143	1.72316e-05	24507	11	235568	SLD2
144	1.56513e-05	35309	14	710076	FPK1
145	9.49098e-06	40102	16	207364	TCO89
146	-0.0190236	5317	4	46068	ydl228c
147	0.0453575	9520	5	34811	NPR2

## Sheet: 33C_epistatic
QTL	Effect	Lead SNP 1 Index	Chromosome 1	Lead SNP 1 Position	Lead SNP 1 Gene	Lead SNP 2 Index	Chromosome 2	Lead SNP 2 Position	Lead SNP 2 Gene
1	-0.00825868	5318	4	51735	GCS1	34744	14	467214	MKT1
2	-0.00702307	30756	13	49588	BUL2	36460	15	172102	IRA2
3	0.00692314	26873	12	129090	sof1	26883	12	134767	LMO1
4	0.00672858	3453	2	536349	ARA1	36460	15	172102	IRA2
5	0.00671603	9929	5	194432	GPA2	36460	15	172102	IRA2
6	0.00598028	31936	13	331334	RSF1	34744	14	467214	MKT1
7	0.00586772	27546	12	369481	ahp1	34744	14	467214	MKT1
8	0.00583249	22941	10	658095	VPS70	31936	13	331334	RSF1
9	-0.00558553	26873	12	129090	sof1	34744	14	467214	MKT1
10	-0.00557816	38224	15	521664	RGS2	39511	15	941215	MIP1
11	-0.00514358	26883	12	134767	LMO1	36460	15	172102	IRA2
12	-0.00513401	36460	15	172102	IRA2	40936	16	502085	SKS1
13	0.00503804	34322	14	268395	WHI3	36460	15	172102	IRA2
14	0.00500476	30189	12	940925	VIP1	33590	13	915509	fet4
15	0.00483765	28226	12	650766	HAP1	34744	14	467214	MKT1
16	0.00469265	14189	7	399014	OLE1	34744	14	467214	MKT1
17	-0.00452751	5318	4	51735	GCS1	22941	10	658095	VPS70
18	0.0045025	22941	10	658095	VPS70	34744	14	467214	MKT1
19	0.00436519	31936	13	331334	RSF1	36460	15	172102	IRA2
20	0.00432624	30756	13	49588	BUL2	34744	14	467214	MKT1
21	0.00410683	28226	12	650766	HAP1	30756	13	49588	BUL2
22	-0.0040764	5318	4	51735	GCS1	28226	12	650766	HAP1
23	-0.00404616	34700	14	442260	PHO23	36460	15	172102	IRA2
24	0.00391736	26873	12	129090	sof1	28368	12	674876	NEJ1
25	0.00384036	5500	4	83327	uga4	34744	14	467214	MKT1
26	0.00377314	28226	12	650766	HAP1	30658	13	25025	PHO84
27	-0.00371404	5318	4	51735	GCS1	30756	13	49588	BUL2
28	0.00366325	9929	5	194432	GPA2	34744	14	467214	MKT1
29	0.0036017	26873	12	129090	sof1	30315	12	968901	DCK1
30	-0.00356961	34744	14	467214	MKT1	40397	16	356243	MSD1
31	0.00354917	30315	12	968901	DCK1	36460	15	172102	IRA2
32	0.00354208	31015	13	93860	UFO1	34744	14	467214	MKT1
33	0.00352323	9929	5	194432	GPA2	40936	16	502085	SKS1
34	-0.0034532	3453	2	536349	ARA1	28226	12	650766	HAP1
35	0.00344155	28226	12	650766	HAP1	36566	15	185793	brx1
36	-0.0034399	10520	5	398390	avt6	22941	10	658095	VPS70
37	0.00337139	36566	15	185793	brx1	39760	16	82484	gal4
38	0.0033703	8258	4	1197839	TFC6	34765	14	487813	MLF3
39	0.00330123	21951	10	426287	CYR1	36460	15	172102	IRA2
40	0.00313797	18407	9	66681	MLP2	18605	9	94908	om45
41	-0.00312618	9929	5	194432	GPA2	31936	13	331334	RSF1
42	0.00307791	33482	13	895661	ymr310c	34744	14	467214	MKT1
43	-0.00307308	26883	12	134767	LMO1	40936	16	502085	SKS1
44	0.00301158	9929	5	194432	GPA2	26883	12	134767	LMO1
45	0.00296116	28226	12	650766	HAP1	39511	15	941215	MIP1
46	0.00294102	284	1	50432	OAF1	36566	15	185793	brx1
47	0.002884	22941	10	658095	VPS70	30756	13	49588	BUL2
48	-0.00287456	34744	14	467214	MKT1	37349	15	411026	WHI2
49	-0.00285043	5950	4	165032	CDC9	33590	13	915509	fet4
50	-0.00281648	18861	9	154390	HOS4	34744	14	467214	MKT1
51	0.0028034	5500	4	83327	uga4	22941	10	658095	VPS70
52	-0.00277964	7409	4	637663	GIS1	36460	15	172102	IRA2
53	0.00275309	27657	12	498920	rps31	30189	12	940925	VIP1
54	-0.00274409	5318	4	51735	GCS1	30189	12	940925	VIP1
55	-0.00272175	5318	4	51735	GCS1	9929	5	194432	GPA2
56	-0.00271782	7409	4	637663	GIS1	28226	12	650766	HAP1
57	-0.00271772	30854	13	67103	NUP188	39511	15	941215	MIP1
58	0.00268604	3453	2	536349	ARA1	30756	13	49588	BUL2
59	0.0026073	284	1	50432	OAF1	30854	13	67103	NUP188
60	-0.00257674	34591	14	400970	ynl120c	34744	14	467214	MKT1
61	0.00257456	13305	7	128438	MDS3	36460	15	172102	IRA2
62	-0.00255672	8318	4	1261388	she9	34765	14	487813	MLF3
63	0.00255077	13305	7	128438	MDS3	40936	16	502085	SKS1
64	-0.00254017	36460	15	172102	IRA2	40397	16	356243	MSD1
65	-0.00253738	30658	13	25025	PHO84	36460	15	172102	IRA2
66	-0.00250054	34744	14	467214	MKT1	40102	16	207364	TCO89
67	0.00249469	21951	10	426287	CYR1	41059	16	517743	CTF19
68	-0.00248118	10520	5	398390	avt6	34744	14	467214	MKT1
69	-0.00244451	284	1	50432	OAF1	28226	12	650766	HAP1
70	-0.00241675	17505	8	315448	BIG1	34700	14	442260	PHO23
71	0.00240286	18877	9	161741	YIL108W	22941	10	658095	VPS70
72	0.00235893	28226	12	650766	HAP1	38553	15	589882	arp8
73	-0.00234888	28226	12	650766	HAP1	37349	15	411026	WHI2
74	0.00234868	10520	5	398390	avt6	28368	12	674876	NEJ1
75	-0.00234715	10048	5	210074	MIG3	13305	7	128438	MDS3
76	-0.00231967	24126	11	154735	ape2	34744	14	467214	MKT1
77	0.00230984	24443	11	227015	ABF1	30756	13	49588	BUL2
78	-0.00227617	3453	2	536349	ARA1	30053	12	905770	ART10
79	0.00222332	14101	7	370360	HSF1	28226	12	650766	HAP1
80	-0.00221132	906	1	196423	swh1	10520	5	398390	avt6
81	0.00220975	8483	4	1372424	TOM1	30756	13	49588	BUL2
82	-0.00217496	11389	6	50685	FET5	28368	12	674876	NEJ1
83	0.00217107	28368	12	674876	NEJ1	38224	15	521664	RGS2
84	-0.00216512	9929	5	194432	GPA2	34322	14	268395	WHI3
85	0.00216366	5318	4	51735	GCS1	41059	16	517743	CTF19
86	0.00216121	34744	14	467214	MKT1	35309	14	710076	FPK1
87	0.00215992	5273	3	288418	git1	34744	14	467214	MKT1
88	-0.00215604	13305	7	128438	MDS3	21951	10	426287	CYR1
89	-0.00215486	284	1	50432	OAF1	21951	10	426287	CYR1
90	-0.00215337	284	1	50432	OAF1	13305	7	128438	MDS3
91	-0.00215004	8483	4	1372424	TOM1	28226	12	650766	HAP1
92	0.00213054	18635	9	101030	FKH1	18861	9	154390	HOS4
93	0.00210321	16850	8	102148	lag1	28368	12	674876	NEJ1
94	0.00209848	26873	12	129090	sof1	31936	13	331334	RSF1
95	-0.0020978	35751	15	67209	bsc6	36460	15	172102	IRA2
96	-0.00208112	34744	14	467214	MKT1	40936	16	502085	SKS1
97	0.0020734	9929	5	194432	GPA2	30658	13	25025	PHO84
98	-0.0020639	284	1	50432	OAF1	9929	5	194432	GPA2
99	0.0020356	16850	8	102148	lag1	34700	14	442260	PHO23
100	0.00202341	5806	4	138482	PCL9	33482	13	895661	ymr310c
101	0.0020228	13305	7	128438	MDS3	26883	12	134767	LMO1
102	0.00200503	2443	2	383391	RDH54	28226	12	650766	HAP1
103	0.00198204	30756	13	49588	BUL2	39257	15	840862	RIM20
104	-0.00197273	26883	12	134767	LMO1	30658	13	25025	PHO84
105	0.00196181	36566	15	185793	brx1	36715	15	234124	spe2
106	0.00195051	3453	2	536349	ARA1	7409	4	637663	GIS1
107	-0.00193773	3453	2	536349	ARA1	34322	14	268395	WHI3
108	0.0019371	14101	7	370360	HSF1	30053	12	905770	ART10
109	-0.00193551	2969	2	463355	CYC8	30756	13	49588	BUL2
110	-0.00191827	34765	14	487813	MLF3	37666	15	450923	MSA1
111	0.00191516	13305	7	128438	MDS3	30756	13	49588	BUL2
112	-0.00190613	2443	2	383391	RDH54	38224	15	521664	RGS2
113	0.00190537	284	1	50432	OAF1	14189	7	399014	OLE1
114	0.00189502	21430	10	328739	IKS1	34744	14	467214	MKT1
115	0.00189423	34322	14	268395	WHI3	34744	14	467214	MKT1
116	0.00188132	5273	3	288418	git1	28226	12	650766	HAP1
117	0.00187546	20791	10	110053	TPK1	36460	15	172102	IRA2
118	0.00186732	22941	10	658095	VPS70	38760	15	624091	PDR5
119	0.0018571	21951	10	426287	CYR1	26883	12	134767	LMO1
120	-0.00185385	30189	12	940925	VIP1	34322	14	268395	WHI3
121	-0.00185348	30854	13	67103	NUP188	34322	14	268395	WHI3
122	-0.00183983	26883	12	134767	LMO1	39511	15	941215	MIP1
123	-0.00183603	22941	10	658095	VPS70	40102	16	207364	TCO89
124	0.00183387	34322	14	268395	WHI3	40936	16	502085	SKS1
125	0.00183229	32951	13	643985	SGS1	36566	15	185793	brx1
126	0.00182148	15608	7	907178	ADE3	34744	14	467214	MKT1
127	0.00179489	8258	4	1197839	TFC6	40686	16	451315	sur1
128	0.00178794	30658	13	25025	PHO84	31936	13	331334	RSF1
129	0.00178407	18635	9	101030	FKH1	28226	12	650766	HAP1
130	-0.00176745	7118	4	527319	ena5	34744	14	467214	MKT1
131	0.00174497	32193	13	425898	SEC14	40936	16	502085	SKS1
132	-0.00173285	32193	13	425898	SEC14	34744	14	467214	MKT1
133	0.00171596	29571	12	824405	KAP95	30756	13	49588	BUL2
134	-0.00170498	5273	3	288418	git1	30658	13	25025	PHO84
135	0.00170211	5806	4	138482	PCL9	34744	14	467214	MKT1
136	0.00168669	30315	12	968901	DCK1	40936	16	502085	SKS1
137	-0.00168354	15807	7	953711	phb2	28226	12	650766	HAP1
138	0.00166568	22343	10	522284	TAH11	27657	12	498920	rps31
139	0.0016641	10520	5	398390	avt6	18861	9	154390	HOS4
140	0.00163392	21430	10	328739	IKS1	36460	15	172102	IRA2
141	-0.00162786	3453	2	536349	ARA1	31936	13	331334	RSF1
142	0.0016275	30756	13	49588	BUL2	32951	13	643985	SGS1
143	0.00160914	3453	2	536349	ARA1	40686	16	451315	sur1
144	0.00159329	32193	13	425898	SEC14	36566	15	185793	brx1
145	-0.0015813	18877	9	161741	YIL108W	34366	14	299000	PBR1
146	-0.00157687	7085	4	507490	mrh1	28226	12	650766	HAP1
147	-0.00157428	14101	7	370360	HSF1	33590	13	915509	fet4
148	-0.00156657	8258	4	1197839	TFC6	26883	12	134767	LMO1
149	-0.00156122	906	1	196423	swh1	36460	15	172102	IRA2
150	-0.00155615	27657	12	498920	rps31	36566	15	185793	brx1
151	-0.00155031	15807	7	953711	phb2	22343	10	522284	TAH11
152	-0.00154445	27657	12	498920	rps31	40686	16	451315	sur1
153	-0.00153075	15128	7	801751	PTI1	36460	15	172102	IRA2
154	-0.00153045	3453	2	536349	ARA1	21951	10	426287	CYR1
155	0.0015274	26873	12	129090	sof1	34322	14	268395	WHI3
156	-0.00152664	22941	10	658095	VPS70	23113	11	3224	ykl222c
157	0.00152464	34700	14	442260	PHO23	38760	15	624091	PDR5
158	-0.0015176	17541	8	356284	ept1	22941	10	658095	VPS70
159	-0.00151445	1129	2	119103	TOD6	7118	4	527319	ena5
160	-0.0015044	26873	12	129090	sof1	40397	16	356243	MSD1
161	-0.00150433	14101	7	370360	HSF1	21430	10	328739	IKS1
162	-0.00150314	38224	15	521664	RGS2	41059	16	517743	CTF19
163	0.00150156	34700	14	442260	PHO23	39760	16	82484	gal4
164	0.00149728	27546	12	369481	ahp1	28368	12	674876	NEJ1
165	-0.00148999	26873	12	129090	sof1	35751	15	67209	bsc6
166	-0.00148809	8948	4	1484424	SPS2	30189	12	940925	VIP1
167	0.00148751	25016	11	356202	mmo1	28368	12	674876	NEJ1
168	0.00148498	6844	4	386657	pus9	30854	13	67103	NUP188
169	-0.00147796	15128	7	801751	PTI1	41059	16	517743	CTF19
170	0.00147186	18407	9	66681	MLP2	30854	13	67103	NUP188
171	-0.00146056	14975	7	701396	ygr107w	30658	13	25025	PHO84
172	0.00144239	11492	6	73633	RIM15	33590	13	915509	fet4
173	0.00143804	3453	2	536349	ARA1	35751	15	67209	bsc6
174	-0.00142294	13305	7	128438	MDS3	22941	10	658095	VPS70
175	-0.00141251	284	1	50432	OAF1	31936	13	331334	RSF1
176	-0.00141133	10520	5	398390	avt6	25016	11	356202	mmo1
177	0.00140576	8948	4	1484424	SPS2	30854	13	67103	NUP188
178	0.00139963	16555	8	50351	WSC4	31936	13	331334	RSF1
179	-0.00139909	22343	10	522284	TAH11	30189	12	940925	VIP1
180	0.00139041	34322	14	268395	WHI3	39257	15	840862	RIM20
181	0.00138935	14101	7	370360	HSF1	41059	16	517743	CTF19
182	-0.00138681	39624	15	1004678	gds1	40397	16	356243	MSD1
183	0.00138307	9929	5	194432	GPA2	27657	12	498920	rps31
184	0.00137852	34366	14	299000	PBR1	38224	15	521664	RGS2
185	0.00137673	3453	2	536349	ARA1	15608	7	907178	ADE3
186	0.00137275	17819	8	427164	DNA2	38224	15	521664	RGS2
187	0.00136396	2443	2	383391	RDH54	30189	12	940925	VIP1
188	-0.00136335	14101	7	370360	HSF1	22941	10	658095	VPS70
189	-0.00135954	21951	10	426287	CYR1	31936	13	331334	RSF1
190	0.00134723	32193	13	425898	SEC14	39257	15	840862	RIM20
191	0.00134395	10352	5	279033	GPP2	19378	9	276747	GVP36
192	0.00134287	6844	4	386657	pus9	41059	16	517743	CTF19
193	0.00133598	30854	13	67103	NUP188	40102	16	207364	TCO89
194	-0.00133118	10883	5	526674	RAD3	39466	15	895003	SNU66
195	-0.00132075	3453	2	536349	ARA1	20957	10	127843	SSY5
196	-0.00128318	2969	2	463355	CYC8	31936	13	331334	RSF1
197	-0.0012795	33482	13	895661	ymr310c	37349	15	411026	WHI2
198	-0.00261242	5317	4	46068	ydl228c	37349	15	411026	WHI2
199	0.0028716	5317	4	46068	ydl228c	24507	11	235568	SLD2
200	0.00334492	5317	4	46068	ydl228c	31936	13	331334	RSF1
201	0.00340942	5317	4	46068	ydl228c	9929	5	194432	GPA2
202	-0.00391316	5317	4	46068	ydl228c	36460	15	172102	IRA2
203	-0.00454875	5317	4	46068	ydl228c	40936	16	502085	SKS1
204	-0.00556686	5317	4	46068	ydl228c	30053	12	905770	ART10
205	0.005742	5317	4	46068	ydl228c	30756	13	49588	BUL2
206	0.00739235	5317	4	46068	ydl228c	28226	12	650766	HAP1
207	0.00772933	5317	4	46068	ydl228c	22941	10	658095	VPS70
208	0.00959048	9520	5	34811	NPR2	37349	15	411026	WHI2
209	0.00992133	5317	4	46068	ydl228c	30189	12	940925	VIP1
210	-0.0111845	7085	4	507490	mrh1	9520	5	34811	NPR2
211	0.0114773	5317	4	46068	ydl228c	34744	14	467214	MKT1
212	-0.0117805	9520	5	34811	NPR2	22343	10	522284	TAH11
213	-0.0121593	9520	5	34811	NPR2	30756	13	49588	BUL2
214	-0.0135939	9520	5	34811	NPR2	34700	14	442260	PHO23
215	0.0201176	4953	3	146289	HSP30	9520	5	34811	NPR2
216	-0.0289215	9520	5	34811	NPR2	28226	12	650766	HAP1

[truncated: 26 more sheets: 35C_additive, 35C_epistatic, 37C_additive, 37C_epistatic, 4NQO_additive, 4NQO_epistatic, cu_additive, cu_epistatic, eth_additive, eth_epistatic, li_additive, li_epistatic, gu_additive, gu_epistatic, mann_additive, mann_epistatic, mol_additive, mol_epistatic, raff_additive, raff_epistatic …]
