# Supplementary material for: Barcoded Bulk QTL mapping reveals highly polygenic and epistatic architecture of complex traits in yeast
Source: bioRxiv preprint, doi:10.1101/2021.09.08.459513, version 1 (2021-09-09)
Supplement: Supplementary Data 8 [file 459513_file12.xlsx]

## Sheet: Sheet1
Index	SNP	Chromosome	Position (bp)	BY allele	RM allele
0	snp1	1	27210	A	G
1	snp2	1	27290	C	A
2	snp3	1	27356	T	C
3	snp4	1	27357	A	G
4	snp5	1	27370	G	A
5	snp6	1	27380	T	G
6	snp7	1	27667	A	T
7	snp8	1	27668	A	T
8	snp9	1	27681	A	G
9	snp10	1	27684	A	C
10	snp11	1	27685	G	T
11	snp12	1	27688	A	T
12	snp13	1	27693	G	C
13	snp14	1	27804	C	A
14	snp15	1	27810	T	C
15	snp16	1	27816	G	A
16	snp17	1	27822	T	C
17	snp18	1	27823	C	A
18	snp19	1	27825	C	T
19	snp20	1	27914	T	C
20	snp21	1	27948	A	G
21	snp22	1	27970	T	G
22	snp23	1	27983	T	A
23	snp24	1	27997	T	C
24	snp25	1	28007	G	C
25	snp26	1	28083	T	C
26	snp27	1	28117	G	C
27	snp28	1	28127	T	C
28	snp29	1	28321	G	A
29	snp30	1	28352	C	T
30	snp31	1	28384	G	C
31	snp32	1	28385	A	G
32	snp33	1	28433	G	A
33	snp34	1	28458	C	T
34	snp35	1	28495	A	G
35	snp36	1	28517	A	G
36	snp37	1	28650	G	T
37	snp38	1	28666	A	G
38	snp39	1	28684	A	G
39	snp40	1	28696	G	T
40	snp41	1	28844	C	T
41	snp42	1	28926	A	T
42	snp43	1	29002	A	T
43	snp44	1	29004	T	A
44	snp45	1	29006	A	G
45	snp46	1	29093	A	T
46	snp47	1	29109	G	C
47	snp48	1	29118	C	T
48	snp49	1	29126	T	C
49	snp50	1	29131	A	G
50	snp51	1	29154	G	A
51	snp52	1	29180	T	C
52	snp53	1	29245	G	A
53	snp54	1	29282	C	T
54	snp55	1	29322	G	C
55	snp56	1	29352	T	C
56	snp57	1	29354	T	A
57	snp58	1	29374	C	T
58	snp59	1	29397	T	C
59	snp60	1	29400	C	T
60	snp61	1	29402	A	T
61	snp62	1	29508	T	C
62	snp63	1	29522	T	A
63	snp64	1	29530	C	T
64	snp65	1	29564	T	C
65	snp66	1	29666	C	A
66	snp67	1	29693	G	A
67	snp68	1	29713	T	A
68	snp69	1	29746	T	C
69	snp70	1	30153	G	A
70	snp71	1	30204	A	G
71	snp72	1	30209	T	A
72	snp73	1	30220	G	A
73	snp74	1	30239	A	G
74	snp75	1	30265	T	G
75	snp76	1	30268	C	G
76	snp77	1	30274	G	A
77	snp78	1	30275	A	G
78	snp79	1	30277	A	G
79	snp80	1	30290	C	A
80	snp81	1	30300	C	A
81	snp82	1	30307	T	C
82	snp83	1	30313	A	G
83	snp84	1	30335	C	T
84	snp85	1	30351	A	G
85	snp86	1	30352	C	A
86	snp87	1	30356	C	G
87	snp88	1	30361	A	T
88	snp89	1	30371	C	A
89	snp90	1	30381	T	C
90	snp91	1	30624	T	A
91	snp92	1	30662	T	G
92	snp93	1	30669	T	C
93	snp94	1	30670	T	C
94	snp95	1	30713	T	G
95	snp96	1	30747	A	C
96	snp97	1	30749	G	A
97	snp98	1	30755	C	G
98	snp99	1	30782	T	C
99	snp100	1	30787	T	C
100	snp101	1	30817	T	C
101	snp102	1	30840	G	A
102	snp103	1	30852	T	C
103	snp104	1	30980	G	A
104	snp105	1	30987	T	G
105	snp106	1	31018	G	A
106	snp107	1	31026	G	C
107	snp108	1	31058	G	A
108	snp109	1	31152	C	T
109	snp110	1	31154	G	A
110	snp111	1	31168	A	G
111	snp112	1	31176	A	G
112	snp113	1	31212	G	A
113	snp114	1	31391	A	G
114	snp115	1	31403	T	A
115	snp116	1	31435	C	T
116	snp117	1	31635	T	C
117	snp118	1	31755	C	T
118	snp119	1	31821	C	T
119	snp120	1	31848	T	C
120	snp121	1	31975	C	T
121	snp122	1	31989	T	C
122	snp123	1	32145	C	T
123	snp124	1	32158	T	C
124	snp125	1	32271	G	A
125	snp126	1	32511	C	T
126	snp127	1	32652	A	C
127	snp128	1	32883	C	T
128	snp129	1	32986	G	T
129	snp130	1	32989	G	A
130	snp131	1	33040	A	G
131	snp132	1	33048	A	C
132	snp133	1	33070	A	T
133	snp134	1	33077	G	A
134	snp135	1	33147	G	T
135	snp136	1	33152	T	C
136	snp137	1	33200	C	T
137	snp138	1	33293	A	T
138	snp139	1	33328	C	A
139	snp140	1	33347	T	A
140	snp141	1	33348	G	C
141	snp142	1	33403	C	T
142	snp143	1	33502	A	G
143	snp144	1	33548	A	C
144	snp145	1	33612	A	G
145	snp146	1	33892	C	G
146	snp147	1	33996	A	G
147	snp148	1	34170	T	A
148	snp149	1	34308	C	T
149	snp150	1	34515	T	C
150	snp151	1	34554	A	G
151	snp152	1	34943	C	G
152	snp153	1	34991	A	G
153	snp154	1	35059	G	A
154	snp155	1	35070	C	T
155	snp156	1	35466	G	A
156	snp157	1	35508	A	G
157	snp158	1	35514	T	C
158	snp159	1	35565	A	G
159	snp160	1	35568	A	G
160	snp161	1	35631	G	C
161	snp162	1	35668	G	A
162	snp163	1	35736	G	A
163	snp164	1	35751	T	C
164	snp165	1	35796	T	C
165	snp166	1	35818	A	G
166	snp167	1	35970	T	C
167	snp168	1	36005	A	G
168	snp169	1	36048	C	G
169	snp170	1	36123	C	T
170	snp171	1	36146	A	T
171	snp172	1	36160	G	A
172	snp173	1	36313	A	G
173	snp174	1	36524	C	T
174	snp175	1	36574	A	G
175	snp176	1	36637	A	G
176	snp177	1	36898	C	T
177	snp178	1	37008	C	A
178	snp179	1	37019	A	G
179	snp180	1	37069	C	T
180	snp181	1	37255	T	C
181	snp182	1	37294	T	C
182	snp183	1	37315	T	A
183	snp184	1	37330	A	G
184	snp185	1	37409	A	C
185	snp186	1	37478	G	C
186	snp187	1	37553	A	G
187	snp188	1	37595	G	A
188	snp189	1	37885	C	T
189	snp190	1	37976	C	A
190	snp191	1	38120	A	T
191	snp192	1	38236	A	G
192	snp193	1	38361	C	T
193	snp194	1	38490	C	G
194	snp195	1	38504	T	G
195	snp196	1	38508	G	T
196	snp197	1	38524	C	A
197	snp198	1	38533	T	C
198	snp199	1	38657	G	A
199	snp200	1	38689	G	C
200	snp201	1	38888	A	C
201	snp202	1	38980	G	A
202	snp203	1	39009	T	C
203	snp204	1	39105	A	G
204	snp205	1	39123	C	T
205	snp206	1	39144	G	A
206	snp207	1	39162	C	G
207	snp208	1	39795	G	A
208	snp209	1	39901	T	C
209	snp210	1	39919	T	C
210	snp211	1	39920	T	C
211	snp212	1	39963	G	A
212	snp213	1	40064	C	T
213	snp214	1	40237	C	T
214	snp215	1	40380	G	A
215	snp216	1	40860	A	G
216	snp217	1	40866	T	C
217	snp218	1	40914	C	G
218	snp219	1	41278	G	A
219	snp220	1	41481	A	G
220	snp221	1	41499	A	G
221	snp222	1	41587	C	T
222	snp223	1	41736	T	C
223	snp224	1	41739	A	G
224	snp225	1	41802	G	A
225	snp226	1	41883	C	T
226	snp227	1	41906	G	A
227	snp228	1	41987	C	T
228	snp229	1	42115	T	C
229	snp230	1	42257	G	A
230	snp231	1	42484	G	A
231	snp232	1	42527	T	C
232	snp233	1	42554	A	T
233	snp234	1	42562	G	A
234	snp235	1	42590	G	A
235	snp236	1	42629	A	G
236	snp237	1	42635	C	T
237	snp238	1	42684	G	A
238	snp239	1	43004	G	A
239	snp240	1	43137	C	T
240	snp241	1	43478	G	A
241	snp242	1	43565	A	G
242	snp243	1	43691	C	T
243	snp244	1	43784	C	G
244	snp245	1	44384	A	G
245	snp246	1	44588	A	G
246	snp247	1	44675	G	A
247	snp248	1	44891	A	G
248	snp249	1	44935	C	A
249	snp250	1	45024	G	A
250	snp251	1	45198	G	A
251	snp252	1	45431	G	A
252	snp253	1	45546	A	T
253	snp254	1	45831	G	C
254	snp255	1	46030	G	A
255	snp256	1	46375	A	T
256	snp257	1	46723	A	G
257	snp258	1	46837	G	A
258	snp259	1	46846	T	C
259	snp260	1	46894	A	G
260	snp261	1	46912	T	G
261	snp262	1	46966	T	C
262	snp263	1	47044	A	C
263	snp264	1	47206	A	G
264	snp265	1	47518	A	G
265	snp266	1	47660	T	C
266	snp267	1	47690	T	C
267	snp268	1	47896	C	T
268	snp269	1	48115	G	C
269	snp270	1	48286	A	T
270	snp271	1	48751	T	C
271	snp272	1	48815	T	C
272	snp273	1	48890	C	T
273	snp274	1	49103	C	T
274	snp275	1	49114	T	C
275	snp276	1	49247	C	T
276	snp277	1	49403	C	T
277	snp278	1	49589	T	C
278	snp279	1	49871	C	T
279	snp280	1	50024	C	T
280	snp281	1	50204	A	G
281	snp282	1	50343	A	G
282	snp283	1	50354	C	T
283	snp284	1	50384	G	A
284	snp285	1	50432	T	C
285	snp286	1	50456	G	A
286	snp287	1	50498	A	G
287	snp288	1	50660	T	A
288	snp289	1	50663	C	T
289	snp290	1	50840	A	G
290	snp291	1	51095	G	A
291	snp292	1	51287	T	C
292	snp293	1	51321	T	C
293	snp294	1	51371	A	C
294	snp295	1	51434	A	G
295	snp296	1	51951	T	G
296	snp297	1	52124	C	T
297	snp298	1	52164	C	T
298	snp299	1	52310	A	G
299	snp300	1	52603	A	T
300	snp301	1	52613	G	A
301	snp302	1	52632	T	C
302	snp303	1	52733	A	G
303	snp304	1	52846	G	A
304	snp305	1	52849	A	G
305	snp306	1	52858	T	C
306	snp307	1	52939	C	T
307	snp308	1	52951	G	T
308	snp309	1	52984	A	G
309	snp310	1	52996	A	G
310	snp311	1	53146	T	G
311	snp312	1	53167	A	G
312	snp313	1	53266	C	T
313	snp314	1	53542	C	T
314	snp315	1	53836	A	G
315	snp316	1	53843	C	T
316	snp317	1	53851	G	A
317	snp318	1	53935	A	T
318	snp319	1	54175	A	G
319	snp320	1	54198	G	A
320	snp321	1	54244	A	G
321	snp322	1	54319	T	C
322	snp323	1	54478	G	A
323	snp324	1	54481	T	C
324	snp325	1	54508	A	G
325	snp326	1	54661	G	T
326	snp327	1	54679	C	T
327	snp328	1	54742	A	C
328	snp329	1	54784	A	G
329	snp330	1	54806	T	C
330	snp331	1	55145	C	T
331	snp332	1	55171	A	G
332	snp333	1	55213	A	C
333	snp334	1	55256	A	G
334	snp335	1	55327	C	A
335	snp336	1	55508	T	C
336	snp337	1	55688	T	C
337	snp338	1	55793	T	C
338	snp339	1	56007	A	G
339	snp340	1	56107	T	C
340	snp341	1	56129	T	C
341	snp342	1	56144	T	G
342	snp343	1	56195	A	G
343	snp344	1	56351	G	A
344	snp345	1	56786	G	A
345	snp346	1	56871	C	T
346	snp347	1	56878	T	C
347	snp348	1	56904	G	C
348	snp349	1	57041	C	T
349	snp350	1	57155	G	A
350	snp351	1	57320	C	T
351	snp352	1	57669	T	C
352	snp353	1	58073	G	A
353	snp354	1	58490	A	T
354	snp355	1	58494	C	T
355	snp356	1	58600	G	T
356	snp357	1	58794	G	A
357	snp358	1	58827	G	A
358	snp359	1	59073	C	T
359	snp360	1	59229	G	T
360	snp361	1	59265	C	A
361	snp362	1	59349	A	C
362	snp363	1	59394	G	A
363	snp364	1	59475	C	T
364	snp365	1	59496	A	G
365	snp366	1	59659	C	G
366	snp367	1	59976	T	C
367	snp368	1	59985	T	C
368	snp369	1	60165	T	C
369	snp370	1	60198	C	T
370	snp371	1	60246	C	T
371	snp372	1	60384	C	T
372	snp373	1	60417	C	T
373	snp374	1	60526	A	G
374	snp375	1	60774	T	C
375	snp376	1	60912	A	G
376	snp377	1	62361	T	C
377	snp378	1	62654	C	T
378	snp379	1	62869	C	G
379	snp380	1	63520	T	C
380	snp381	1	64483	G	A
381	snp382	1	65365	G	A
382	snp383	1	65431	C	T
383	snp384	1	65453	A	G
384	snp385	1	65506	T	C
385	snp386	1	65514	A	T
386	snp387	1	65570	A	G
387	snp388	1	65590	T	C
388	snp389	1	65719	C	T
389	snp390	1	65871	G	A
390	snp391	1	65892	A	C
391	snp392	1	65910	T	C
392	snp393	1	65991	G	A
393	snp394	1	66003	T	C
394	snp395	1	66033	A	G
395	snp396	1	66948	C	T
396	snp397	1	67269	A	G
397	snp398	1	67275	G	A
398	snp399	1	67421	A	C
399	snp400	1	67441	G	A
400	snp401	1	67476	C	G
401	snp402	1	68785	A	C
402	snp403	1	69603	T	C
403	snp404	1	69675	G	A
404	snp405	1	69678	A	G
405	snp406	1	69731	G	A
406	snp407	1	69759	G	A
407	snp408	1	70024	T	C
408	snp409	1	70045	A	G
409	snp410	1	70071	C	T
410	snp411	1	70280	A	G
411	snp412	1	71601	G	A
412	snp413	1	74327	T	C
413	snp414	1	74572	A	G
414	snp415	1	76030	T	C
415	snp416	1	76368	G	C
416	snp417	1	76386	G	A
417	snp418	1	76417	T	C
418	snp419	1	76456	G	A
419	snp420	1	76496	A	G
420	snp421	1	76497	A	G
421	snp422	1	77115	G	T
422	snp423	1	81262	G	A
423	snp424	1	81442	G	A
424	snp425	1	81999	C	T
425	snp426	1	82379	G	A
426	snp427	1	82431	C	T
427	snp428	1	83284	A	G
428	snp429	1	83613	T	C
429	snp430	1	84112	T	C
430	snp431	1	84858	C	A
431	snp432	1	85480	C	T
432	snp433	1	87445	A	T
433	snp434	1	88173	C	A
434	snp435	1	88212	C	T
435	snp436	1	88393	A	C
436	snp437	1	88638	A	G
437	snp438	1	88645	G	C
438	snp439	1	88782	G	A
439	snp440	1	88812	A	G
440	snp441	1	89010	T	C
441	snp442	1	89060	C	T
442	snp443	1	89266	A	C
443	snp444	1	89268	T	C
444	snp445	1	89334	T	C
445	snp446	1	89430	C	T
446	snp447	1	89433	A	G
447	snp448	1	89472	A	G
448	snp449	1	89484	C	G
449	snp450	1	89494	A	G
450	snp451	1	89561	T	C
451	snp452	1	89705	T	C
452	snp453	1	89805	C	T
453	snp454	1	89880	C	T
454	snp455	1	89979	A	G
455	snp456	1	90064	G	T
456	snp457	1	90330	G	T
457	snp458	1	91472	A	G
458	snp459	1	93789	T	A
459	snp460	1	94351	G	A
460	snp461	1	94472	G	A
461	snp462	1	99471	A	G
462	snp463	1	101281	C	A
463	snp464	1	107538	G	A
464	snp465	1	109735	A	G
465	snp466	1	112136	G	T
466	snp467	1	112237	C	T
467	snp468	1	112549	G	A
468	snp469	1	112742	C	G
469	snp470	1	113132	A	G
470	snp471	1	113207	T	C
471	snp472	1	113326	C	G
472	snp473	1	114628	G	T
473	snp474	1	114652	C	T
474	snp475	1	114824	C	T
475	snp476	1	116327	T	C
476	snp477	1	119344	G	A
477	snp478	1	119350	A	G
478	snp479	1	119404	G	C
479	snp480	1	119460	G	A
480	snp481	1	119659	T	G
481	snp482	1	119951	T	C
482	snp483	1	120347	C	T
483	snp484	1	120378	G	A
484	snp485	1	127853	G	A
485	snp486	1	128302	T	C
486	snp487	1	128704	C	A
487	snp488	1	129476	A	G
488	snp489	1	129517	T	C
489	snp490	1	130254	T	C
490	snp491	1	130271	C	T
491	snp492	1	130292	C	T
492	snp493	1	130362	C	T
493	snp494	1	130776	C	G
494	snp495	1	130975	G	A
495	snp496	1	131539	C	T
496	snp497	1	131635	T	C
497	snp498	1	131980	C	T
498	snp499	1	132189	A	C
499	snp500	1	132423	A	G
500	snp501	1	132468	T	C
501	snp502	1	132618	A	G
502	snp503	1	132723	G	A
503	snp504	1	132831	A	G
504	snp505	1	133080	A	G
505	snp506	1	133134	C	T
506	snp507	1	133174	G	A
507	snp508	1	133346	C	T
508	snp509	1	133347	C	T
509	snp510	1	133374	G	A
510	snp511	1	133425	G	C
511	snp512	1	133429	T	G
512	snp513	1	133615	G	A
513	snp514	1	133640	A	G
514	snp515	1	133749	G	A
515	snp516	1	133857	G	A
516	snp517	1	134219	C	T
517	snp518	1	134475	T	C
518	snp519	1	134587	G	A
519	snp520	1	134604	A	G
520	snp521	1	134639	G	A
521	snp522	1	134661	G	A
522	snp523	1	135181	C	T
523	snp524	1	135222	G	A
524	snp525	1	135325	G	C
525	snp526	1	135417	T	A
526	snp527	1	135827	G	A
527	snp528	1	135952	C	T
528	snp529	1	136041	G	A
529	snp530	1	136057	A	G
530	snp531	1	136153	C	G
531	snp532	1	136160	C	T
532	snp533	1	136195	C	T
533	snp534	1	136667	G	A
534	snp535	1	136814	T	C
535	snp536	1	136961	T	C
536	snp537	1	137148	C	G
537	snp538	1	137167	C	A
538	snp539	1	137237	G	A
539	snp540	1	137264	A	G
540	snp541	1	137336	A	G
541	snp542	1	138257	G	A
542	snp543	1	138499	G	A
543	snp544	1	138591	A	G
544	snp545	1	138650	A	G
545	snp546	1	138655	G	A
546	snp547	1	138666	A	G
547	snp548	1	138667	A	G
548	snp549	1	138668	T	G
549	snp550	1	138669	T	C
550	snp551	1	138770	A	G
551	snp552	1	138780	C	T
552	snp553	1	138785	C	T
553	snp554	1	138791	T	C
554	snp555	1	138793	T	C
555	snp556	1	138806	A	T
556	snp557	1	138807	G	A
557	snp558	1	138823	A	G
558	snp559	1	138824	T	C
559	snp560	1	141802	C	T
560	snp561	1	141835	A	G
561	snp562	1	141913	C	T
562	snp563	1	141984	T	C
563	snp564	1	143085	T	C
564	snp565	1	143622	A	G
565	snp566	1	143638	C	A
566	snp567	1	143679	G	A
567	snp568	1	143806	T	C
568	snp569	1	143852	T	C
569	snp570	1	144684	T	C
570	snp571	1	144826	C	G
571	snp572	1	145634	T	C
572	snp573	1	145720	G	A
573	snp574	1	146738	A	G
574	snp575	1	146820	T	C
575	snp576	1	147726	A	G
576	snp577	1	147785	C	G
577	snp578	1	149307	T	C
578	snp579	1	149467	C	T
579	snp580	1	149562	G	T
580	snp581	1	149773	C	T
581	snp582	1	150303	G	A
582	snp583	1	150921	G	A
583	snp584	1	151010	C	T
584	snp585	1	151332	A	C
585	snp586	1	151450	A	T
586	snp587	1	151453	G	A
587	snp588	1	151460	G	C
588	snp589	1	151465	G	A
589	snp590	1	151475	A	G
590	snp591	1	151478	A	G
591	snp592	1	151483	A	T
592	snp593	1	151501	A	T
593	snp594	1	151502	A	T
594	snp595	1	151503	A	T
595	snp596	1	151511	T	A
596	snp597	1	151521	T	C
597	snp598	1	151658	G	C
598	snp599	1	151740	T	C
599	snp600	1	151834	C	A
600	snp601	1	151963	T	A
601	snp602	1	152004	A	G
602	snp603	1	152235	G	A
603	snp604	1	152239	T	C
604	snp605	1	152274	G	A
605	snp606	1	152291	C	T
606	snp607	1	152336	A	G
607	snp608	1	152709	A	G
608	snp609	1	152728	G	A
609	snp610	1	152932	A	G
610	snp611	1	152970	C	T
611	snp612	1	153156	A	T
612	snp613	1	153742	T	C
613	snp614	1	153762	A	G
614	snp615	1	154084	A	G
615	snp616	1	154086	A	G
616	snp617	1	154332	C	T
617	snp618	1	154746	C	T
618	snp619	1	155562	T	G
619	snp620	1	156174	T	G
620	snp621	1	156314	T	C
621	snp622	1	156315	A	G
622	snp623	1	156383	T	G
623	snp624	1	156393	G	T
624	snp625	1	156394	G	A
625	snp626	1	156403	T	C
626	snp627	1	156518	T	C
627	snp628	1	156538	T	C
628	snp629	1	156554	C	A
629	snp630	1	156584	T	C
630	snp631	1	156614	T	A
631	snp632	1	156615	C	T
632	snp633	1	156633	G	A
633	snp634	1	156651	A	G
634	snp635	1	156666	G	A
635	snp636	1	156835	G	A
636	snp637	1	156949	T	C
637	snp638	1	157114	A	G
638	snp639	1	157134	G	A
639	snp640	1	157269	C	T
640	snp641	1	157339	C	T
641	snp642	1	157344	A	G
642	snp643	1	157428	G	A
643	snp644	1	157912	C	G
644	snp645	1	157927	T	A
645	snp646	1	158089	A	G
646	snp647	1	158200	A	G
647	snp648	1	158341	T	C
648	snp649	1	158503	C	T
649	snp650	1	158597	C	T
650	snp651	1	158641	C	T
651	snp652	1	158733	A	T
652	snp653	1	158824	G	C
653	snp654	1	158827	G	A
654	snp655	1	158870	T	C
655	snp656	1	158971	A	G
656	snp657	1	159164	G	C
657	snp658	1	159467	G	A
658	snp659	1	160054	G	A
659	snp660	1	166222	C	T
660	snp661	1	166369	T	C
661	snp662	1	167326	C	T
662	snp663	1	168686	G	A
663	snp664	1	168767	G	T
664	snp665	1	168772	G	A
665	snp666	1	168787	C	A
666	snp667	1	168836	G	A
667	snp668	1	169205	C	T
668	snp669	1	169217	T	C
669	snp670	1	169243	C	T
670	snp671	1	169269	T	C
671	snp672	1	169422	C	T
672	snp673	1	169476	T	C
673	snp674	1	169638	T	C
674	snp675	1	169689	C	T
675	snp676	1	169830	A	G
676	snp677	1	169887	C	T
677	snp678	1	169992	T	C
678	snp679	1	170022	T	C
679	snp680	1	170564	G	A
680	snp681	1	171389	A	G
681	snp682	1	171431	G	A
682	snp683	1	171975	A	G
683	snp684	1	172113	C	A
684	snp685	1	172129	A	T
685	snp686	1	172431	A	T
686	snp687	1	172585	A	T
687	snp688	1	173222	A	C
688	snp689	1	173339	G	A
689	snp690	1	173845	T	C
690	snp691	1	174118	G	A
691	snp692	1	174371	T	C
692	snp693	1	174746	T	G
693	snp694	1	174919	A	G
694	snp695	1	174938	G	A
695	snp696	1	175281	G	A
696	snp697	1	175315	G	A
697	snp698	1	175523	G	T
698	snp699	1	175541	A	G
699	snp700	1	175653	C	T
700	snp701	1	175818	T	G
701	snp702	1	175876	C	T
702	snp703	1	175989	C	T
703	snp704	1	176001	T	C
704	snp705	1	176230	T	C
705	snp706	1	176266	A	T
706	snp707	1	176273	A	G
707	snp708	1	176512	T	A
708	snp709	1	176650	G	A
709	snp710	1	176694	A	G
710	snp711	1	176721	G	A
711	snp712	1	176948	A	G
712	snp713	1	177285	T	C
713	snp714	1	177667	T	C
714	snp715	1	178191	A	T
715	snp716	1	178602	G	C
716	snp717	1	178654	G	A
717	snp718	1	178674	G	A
718	snp719	1	178682	C	T
719	snp720	1	178802	A	G
720	snp721	1	178875	G	C
721	snp722	1	178905	G	A
722	snp723	1	178960	T	C
723	snp724	1	178989	A	G
724	snp725	1	179014	A	G
725	snp726	1	179051	A	G
726	snp727	1	179052	A	G
727	snp728	1	179221	A	G
728	snp729	1	179397	A	G
729	snp730	1	179578	G	A
730	snp731	1	179772	T	C
731	snp732	1	179796	A	C
732	snp733	1	179942	C	T
733	snp734	1	179951	A	C
734	snp735	1	179972	A	G
735	snp736	1	179996	A	G
736	snp737	1	180013	C	T
737	snp738	1	180069	A	G
738	snp739	1	180072	A	C
739	snp740	1	180103	T	C
740	snp741	1	180134	C	T
741	snp742	1	180256	G	C
742	snp743	1	180264	C	T
743	snp744	1	180393	G	A
744	snp745	1	180431	A	G
745	snp746	1	180456	G	A
746	snp747	1	180509	C	T
747	snp748	1	180583	C	A
748	snp749	1	180592	A	G
749	snp750	1	180603	C	T
750	snp751	1	180646	C	T
751	snp752	1	180652	A	C
752	snp753	1	180697	A	G
753	snp754	1	180726	G	C
754	snp755	1	180747	A	G
755	snp756	1	180787	C	T
756	snp757	1	180794	T	A
757	snp758	1	180818	C	A
758	snp759	1	180822	T	A
759	snp760	1	180831	A	T
760	snp761	1	180835	T	C
761	snp762	1	180842	A	G
762	snp763	1	180844	A	T
763	snp764	1	180898	A	C
764	snp765	1	180907	C	T
765	snp766	1	180913	T	C
766	snp767	1	180922	G	T
767	snp768	1	180934	T	A
768	snp769	1	180953	A	G
769	snp770	1	180955	G	A
770	snp771	1	180982	A	C
771	snp772	1	181197	G	T
772	snp773	1	181589	G	A
773	snp774	1	181752	G	C
774	snp775	1	181824	G	A
775	snp776	1	182045	A	G
776	snp777	1	182093	C	T
777	snp778	1	182141	G	T
778	snp779	1	182201	C	T
779	snp780	1	182210	T	A
780	snp781	1	182240	T	C
781	snp782	1	182259	G	A
782	snp783	1	182447	T	A
783	snp784	1	182496	G	A
784	snp785	1	182519	T	C
785	snp786	1	183100	G	A
786	snp787	1	183101	A	G
787	snp788	1	183353	C	T
788	snp789	1	183802	G	A
789	snp790	1	183881	T	C
790	snp791	1	184083	T	C
791	snp792	1	184235	A	G
792	snp793	1	184256	A	G
793	snp794	1	184418	C	G
794	snp795	1	184450	G	C
795	snp796	1	184481	C	A
796	snp797	1	184488	T	C
797	snp798	1	184492	T	C
798	snp799	1	184510	T	C
799	snp800	1	184520	T	C
800	snp801	1	184648	A	T
801	snp802	1	184669	G	T
802	snp803	1	184683	C	G
803	snp804	1	184686	C	T
804	snp805	1	184857	A	G
805	snp806	1	184890	C	A
806	snp807	1	184921	A	T
807	snp808	1	185109	G	A
808	snp809	1	185126	G	A
809	snp810	1	185131	G	A
810	snp811	1	185138	A	T
811	snp812	1	185159	A	C
812	snp813	1	185194	C	A
813	snp814	1	185226	T	C
814	snp815	1	185303	A	G
815	snp816	1	185314	G	A
816	snp817	1	185438	C	T
817	snp818	1	185469	T	C
818	snp819	1	185480	T	G
819	snp820	1	185503	T	C
820	snp821	1	185705	G	A
821	snp822	1	185749	T	G
822	snp823	1	185916	C	A
823	snp824	1	185941	G	A
824	snp825	1	185954	T	A
825	snp826	1	186055	C	T
826	snp827	1	186098	T	A
827	snp828	1	186099	G	A
828	snp829	1	186131	A	G
829	snp830	1	186139	C	T
830	snp831	1	186146	T	G
831	snp832	1	186256	T	C
832	snp833	1	186291	A	G
833	snp834	1	186440	A	T
834	snp835	1	186504	G	C
835	snp836	1	186505	A	C
836	snp837	1	186596	G	A
837	snp838	1	186619	C	A
838	snp839	1	186714	C	T
839	snp840	1	186754	G	A
840	snp841	1	186807	C	T
841	snp842	1	186819	T	C
842	snp843	1	186841	G	A
843	snp844	1	186857	T	C
844	snp845	1	186896	T	G
845	snp846	1	186907	T	C
846	snp847	1	186936	G	A
847	snp848	1	186963	C	A
848	snp849	1	186974	C	T
849	snp850	1	186987	G	A
850	snp851	1	186990	G	C
851	snp852	1	187062	T	C
852	snp853	1	187280	C	G
853	snp854	1	187411	C	T
854	snp855	1	187414	G	T
855	snp856	1	187420	C	T
856	snp857	1	187422	A	G
857	snp858	1	187426	T	C
858	snp859	1	187427	T	A
859	snp860	1	189855	T	C
860	snp861	1	189876	A	G
861	snp862	1	189931	A	G
862	snp863	1	189932	A	G
863	snp864	1	189934	G	A
864	snp865	1	190025	C	T
865	snp866	1	190031	G	A
866	snp867	1	190132	C	T
867	snp868	1	190148	C	T
868	snp869	1	190169	G	C
869	snp870	1	190933	G	C
870	snp871	1	191617	T	C
871	snp872	1	191704	G	C
872	snp873	1	192073	G	A
873	snp874	1	192139	G	A
874	snp875	1	192149	G	A
875	snp876	1	192169	G	A
876	snp877	1	192170	A	G
877	snp878	1	192196	A	G
878	snp879	1	192427	T	C
879	snp880	1	192429	G	C
880	snp881	1	192469	G	A
881	snp882	1	192618	C	T
882	snp883	1	192693	C	T
883	snp884	1	192795	C	T
884	snp885	1	192954	C	A
885	snp886	1	193260	T	C
886	snp887	1	193452	G	A
887	snp888	1	193500	C	T
888	snp889	1	194101	A	G
889	snp890	1	194104	C	T
890	snp891	1	194166	T	C
891	snp892	1	194169	T	C
892	snp893	1	194241	C	T
893	snp894	1	194290	C	A
894	snp895	1	194475	C	T
895	snp896	1	194499	T	A
896	snp897	1	194626	G	A
897	snp898	1	194700	C	T
898	snp899	1	194867	A	T
899	snp900	1	195459	T	C
900	snp901	1	195677	A	G
901	snp902	1	195872	C	T
902	snp903	1	195910	A	G
903	snp904	1	196198	A	G
904	snp905	1	196248	G	C
905	snp906	1	196284	G	A
906	snp907	1	196423	C	T
907	snp908	1	196452	C	T
908	snp909	1	196500	C	T
909	snp910	1	196523	T	A
910	snp911	1	196564	G	A
911	snp912	1	196587	C	T
912	snp913	1	196623	C	T
913	snp914	1	196647	T	C
914	snp915	1	196805	C	T
915	snp916	1	196861	C	T
916	snp917	1	196864	C	A
917	snp918	1	196884	C	T
918	snp919	1	196891	G	T
919	snp920	1	196929	A	G
920	snp921	1	196932	C	T
921	snp922	1	197024	A	G
922	snp923	1	197120	G	A
923	snp924	1	197123	G	A
924	snp925	1	197225	G	A
925	snp926	1	197236	G	T
926	snp927	1	197266	G	T
927	snp928	1	197325	G	A
928	snp929	1	197344	C	T
929	snp930	1	197350	G	A
930	snp931	1	197392	G	A
931	snp932	1	197428	A	T
932	snp933	1	197459	T	C
933	snp934	1	197484	T	C
934	snp935	1	197497	G	A
935	snp936	1	197560	A	G
936	snp937	1	197587	G	A
937	snp938	1	197629	C	T
938	snp939	1	197646	T	G
939	snp940	1	197656	A	G
940	snp941	1	197694	G	T
941	snp942	1	197695	A	G
942	snp943	1	197758	A	G
943	snp944	1	197760	G	C
944	snp945	1	197765	C	G
945	snp946	1	197770	A	G
946	snp947	1	197772	A	G
947	snp948	1	197783	G	A
948	snp949	1	197791	A	G
949	snp950	1	197811	G	A
950	snp951	1	197813	T	C
951	snp952	1	197819	A	G
952	snp953	1	197825	G	A
953	snp954	1	197873	G	A
954	snp955	1	197890	C	T
955	snp956	1	197908	C	T
956	snp957	1	197921	C	G
957	snp958	1	197983	T	A
958	snp959	1	198013	T	A
959	snp960	1	198022	A	G
960	snp961	1	198027	C	T
961	snp962	1	198118	G	A
962	snp963	1	198168	G	T
963	snp964	1	198190	T	C
964	snp965	1	198215	C	A
965	snp966	1	198232	C	G
966	snp967	1	198244	G	T
967	snp968	1	198252	C	G
968	snp969	1	198253	T	G
969	snp970	1	198259	T	C
970	snp971	1	198267	A	G
971	snp972	1	198279	A	G
972	snp973	1	198287	A	G
973	snp974	1	198331	G	T
974	snp975	1	198351	G	A
975	snp976	1	198398	C	T
976	snp977	1	198448	C	G
977	snp978	1	198456	T	A
978	snp979	1	198490	G	C
979	snp980	1	198533	C	T
980	snp981	1	198536	C	T
981	snp982	1	198560	T	C
982	snp983	1	198562	G	A
983	snp984	1	198568	G	C
984	snp985	1	198586	A	G
985	snp986	1	198605	C	T
986	snp987	1	198619	C	T
987	snp988	1	198620	T	G
988	snp989	1	198623	A	T
989	snp990	1	198664	A	G
990	snp991	1	198675	T	C
991	snp992	1	198676	C	T
992	snp993	1	198677	A	G
993	snp994	1	198707	C	T
994	snp995	1	198713	C	T
995	END	1	0	0	0
996	snp996	2	9932	T	C
997	snp997	2	10135	C	T
998	snp998	2	10621	C	T
999	snp999	2	12133	T	C
1000	snp1000	2	12194	A	G
1001	snp1001	2	13061	G	T
1002	snp1002	2	14298	C	G
1003	snp1003	2	15101	G	T
1004	snp1004	2	15222	T	A
1005	snp1005	2	18004	C	T
1006	snp1006	2	18636	T	C
1007	snp1007	2	19967	T	C
1008	snp1008	2	21595	T	A
1009	snp1009	2	22385	G	A
1010	snp1010	2	23441	C	A
1011	snp1011	2	24209	T	C
1012	snp1012	2	24341	G	A
1013	snp1013	2	26500	A	C
1014	snp1014	2	29490	G	T
1015	snp1015	2	29530	A	C
1016	snp1016	2	35631	C	T
1017	snp1017	2	35642	G	T
1018	snp1018	2	35660	T	C
1019	snp1019	2	35672	G	T
1020	snp1020	2	35688	T	G
1021	snp1021	2	35711	C	G
1022	snp1022	2	35712	T	C
1023	snp1023	2	35718	C	T
1024	snp1024	2	35722	T	C
1025	snp1025	2	35736	T	C
1026	snp1026	2	35737	A	C
1027	snp1027	2	36362	A	G
1028	snp1028	2	36366	A	T
1029	snp1029	2	36389	T	C
1030	snp1030	2	36492	C	T
1031	snp1031	2	36830	A	G
1032	snp1032	2	37424	G	A
1033	snp1033	2	37454	C	T
1034	snp1034	2	37628	C	T
1035	snp1035	2	38273	C	T
1036	snp1036	2	38779	C	A
1037	snp1037	2	38800	G	A
1038	snp1038	2	38816	G	A
1039	snp1039	2	39234	A	T
1040	snp1040	2	40260	G	A
1041	snp1041	2	41245	C	T
1042	snp1042	2	47104	G	T
1043	snp1043	2	49603	A	G
1044	snp1044	2	50915	C	T
1045	snp1045	2	51771	T	C
1046	snp1046	2	54156	T	C
1047	snp1047	2	56422	C	T
1048	snp1048	2	59046	C	T
1049	snp1049	2	59164	G	C
1050	snp1050	2	63857	T	C
1051	snp1051	2	67976	C	T
1052	snp1052	2	68834	C	T
1053	snp1053	2	69772	A	G
1054	snp1054	2	71431	G	A
1055	snp1055	2	72663	T	C
1056	snp1056	2	73337	T	C
1057	snp1057	2	73354	C	T
1058	snp1058	2	73448	A	G
1059	snp1059	2	73470	T	C
1060	snp1060	2	73646	A	G
1061	snp1061	2	73697	A	C
1062	snp1062	2	73758	G	T
1063	snp1063	2	73871	C	T
1064	snp1064	2	73943	G	A
1065	snp1065	2	74102	C	T
1066	snp1066	2	74189	T	C
1067	snp1067	2	74688	C	T
1068	snp1068	2	74739	T	G
1069	snp1069	2	74853	A	T
1070	snp1070	2	74920	C	T
1071	snp1071	2	75097	T	A
1072	snp1072	2	75102	G	T
1073	snp1073	2	75103	T	A
1074	snp1074	2	75564	C	T
1075	snp1075	2	76187	G	A
1076	snp1076	2	76203	A	G
1077	snp1077	2	76212	C	T
1078	snp1078	2	76314	T	G
1079	snp1079	2	76824	A	G
1080	snp1080	2	76869	G	A
1081	snp1081	2	76947	A	G
1082	snp1082	2	77223	T	C
1083	snp1083	2	77239	G	A
1084	snp1084	2	77259	G	T
1085	snp1085	2	80748	T	C
1086	snp1086	2	81501	C	T
1087	snp1087	2	83698	C	T
1088	snp1088	2	84412	A	T
1089	snp1089	2	87391	A	C
1090	snp1090	2	87849	G	A
1091	snp1091	2	89547	A	G
1092	snp1092	2	93811	T	C
1093	snp1093	2	93952	T	A
1094	snp1094	2	102053	T	C
1095	snp1095	2	103188	A	G
1096	snp1096	2	107123	A	T
1097	snp1097	2	108452	T	A
1098	snp1098	2	108764	T	C
1099	snp1099	2	109094	T	C
1100	snp1100	2	109165	A	G
1101	snp1101	2	112335	C	A
1102	snp1102	2	114766	T	C
1103	snp1103	2	115270	T	C
1104	snp1104	2	115774	G	A
1105	snp1105	2	116024	T	G
1106	snp1106	2	116038	C	T
1107	snp1107	2	116084	C	T
1108	snp1108	2	116102	G	A
1109	snp1109	2	116106	T	C
1110	snp1110	2	116143	G	A
1111	snp1111	2	116518	C	T
1112	snp1112	2	116701	C	T
1113	snp1113	2	116704	T	C
1114	snp1114	2	116707	A	T
1115	snp1115	2	116832	A	G
1116	snp1116	2	116848	G	T
1117	snp1117	2	116850	G	A
1118	snp1118	2	116939	G	A
1119	snp1119	2	116947	T	G
1120	snp1120	2	117298	A	G
1121	snp1121	2	117595	T	C
1122	snp1122	2	117972	G	A
1123	snp1123	2	118370	A	G
1124	snp1124	2	118457	C	T
1125	snp1125	2	118818	C	A
1126	snp1126	2	118921	C	T
1127	snp1127	2	118953	C	T
1128	snp1128	2	118959	C	T
1129	snp1129	2	119103	T	G
1130	snp1130	2	119499	A	G
1131	snp1131	2	119604	A	G
1132	snp1132	2	119739	A	G
1133	snp1133	2	120090	G	T
1134	snp1134	2	120170	G	A
1135	snp1135	2	120369	G	C
1136	snp1136	2	120427	C	T
1137	snp1137	2	120430	G	A
1138	snp1138	2	120437	C	A
1139	snp1139	2	120585	A	G
1140	snp1140	2	120630	G	A
1141	snp1141	2	120701	A	G
1142	snp1142	2	120888	G	C
1143	snp1143	2	121101	C	T
1144	snp1144	2	121194	G	A
1145	snp1145	2	121421	G	A
1146	snp1146	2	121809	C	T
1147	snp1147	2	121848	C	T
1148	snp1148	2	121908	G	A
1149	snp1149	2	123008	G	A
1150	snp1150	2	123100	G	A
1151	snp1151	2	123103	T	A
1152	snp1152	2	123311	C	T
1153	snp1153	2	123320	T	C
1154	snp1154	2	123339	C	T
1155	snp1155	2	123764	G	A
1156	snp1156	2	123800	C	T
1157	snp1157	2	123940	C	T
1158	snp1158	2	124174	C	G
1159	snp1159	2	124193	C	A
1160	snp1160	2	124286	C	A
1161	snp1161	2	124505	A	G
1162	snp1162	2	124574	T	C
1163	snp1163	2	124616	C	T
1164	snp1164	2	124617	A	G
1165	snp1165	2	124677	T	C
1166	snp1166	2	124932	T	C
1167	snp1167	2	124959	A	C
1168	snp1168	2	124966	A	T
1169	snp1169	2	125022	A	G
1170	snp1170	2	125552	T	C
1171	snp1171	2	126130	C	T
1172	snp1172	2	126263	T	C
1173	snp1173	2	126335	G	A
1174	snp1174	2	126692	G	T
1175	snp1175	2	126836	G	A
1176	snp1176	2	127964	C	T
1177	snp1177	2	128257	A	G
1178	snp1178	2	128423	G	A
1179	snp1179	2	128479	T	G
1180	snp1180	2	128480	T	A
1181	snp1181	2	128547	A	G
1182	snp1182	2	128669	A	G
1183	snp1183	2	128935	T	C
1184	snp1184	2	129254	C	T
1185	snp1185	2	129308	T	A
1186	snp1186	2	129347	G	A
1187	snp1187	2	129386	T	C
1188	snp1188	2	129437	G	A
1189	snp1189	2	129668	C	T
1190	snp1190	2	129692	C	T
1191	snp1191	2	129791	T	A
1192	snp1192	2	130040	T	C
1193	snp1193	2	130349	G	A
1194	snp1194	2	130370	G	T
1195	snp1195	2	130407	A	G
1196	snp1196	2	130769	C	T
1197	snp1197	2	130976	G	A
1198	snp1198	2	130988	T	C
1199	snp1199	2	131020	A	G
1200	snp1200	2	131051	G	A
1201	snp1201	2	131705	G	A
1202	snp1202	2	131783	G	A
1203	snp1203	2	132199	A	G
1204	snp1204	2	132280	T	C
1205	snp1205	2	132482	G	A
1206	snp1206	2	132564	T	C
1207	snp1207	2	132576	G	A
1208	snp1208	2	132654	T	C
1209	snp1209	2	132945	A	G
1210	snp1210	2	132975	T	A
1211	snp1211	2	133163	G	C
1212	snp1212	2	133239	C	T
1213	snp1213	2	133355	T	C
1214	snp1214	2	133435	C	T
1215	snp1215	2	133595	A	G
1216	snp1216	2	133612	A	G
1217	snp1217	2	133742	C	T
1218	snp1218	2	133779	C	T
1219	snp1219	2	133938	A	C
1220	snp1220	2	134090	A	G
1221	snp1221	2	135183	A	C
1222	snp1222	2	135214	G	A
1223	snp1223	2	135402	C	T
1224	snp1224	2	135630	T	A
1225	snp1225	2	135667	A	C
1226	snp1226	2	135827	G	A
1227	snp1227	2	135923	C	T
1228	snp1228	2	136582	C	G
1229	snp1229	2	136632	T	G
1230	snp1230	2	136840	A	T
1231	snp1231	2	137272	T	C
1232	snp1232	2	137341	C	T
1233	snp1233	2	137745	A	G
1234	snp1234	2	137801	T	C
1235	snp1235	2	137859	T	G
1236	snp1236	2	137868	A	G
1237	snp1237	2	137948	A	G
1238	snp1238	2	138318	A	G
1239	snp1239	2	138346	T	C
1240	snp1240	2	138529	G	T
1241	snp1241	2	138695	T	C
1242	snp1242	2	138734	C	T
1243	snp1243	2	138835	A	G
1244	snp1244	2	139079	T	G
1245	snp1245	2	139728	A	G
1246	snp1246	2	140021	C	T
1247	snp1247	2	140061	T	C
1248	snp1248	2	140131	T	C
1249	snp1249	2	140174	C	T
1250	snp1250	2	140383	A	G
1251	snp1251	2	140643	C	A
1252	snp1252	2	140863	G	T
1253	snp1253	2	141015	G	A
1254	snp1254	2	141175	C	T
1255	snp1255	2	141191	G	A
1256	snp1256	2	141207	A	G
1257	snp1257	2	141215	C	T
1258	snp1258	2	141292	C	G
1259	snp1259	2	141553	C	T
1260	snp1260	2	141579	C	T
1261	snp1261	2	141987	A	T
1262	snp1262	2	142133	C	T
1263	snp1263	2	142181	C	T
1264	snp1264	2	142186	G	A
1265	snp1265	2	142208	G	A
1266	snp1266	2	142364	A	G
1267	snp1267	2	142625	C	T
1268	snp1268	2	142804	C	G
1269	snp1269	2	142980	G	A
1270	snp1270	2	143298	A	T
1271	snp1271	2	143327	C	T
1272	snp1272	2	143335	C	G
1273	snp1273	2	143356	T	G
1274	snp1274	2	143491	T	C
1275	snp1275	2	143613	A	G
1276	snp1276	2	143759	A	T
1277	snp1277	2	144151	G	A
1278	snp1278	2	144820	T	G
1279	snp1279	2	144853	G	A
1280	snp1280	2	144937	T	C
1281	snp1281	2	144991	A	G
1282	snp1282	2	145108	T	C
1283	snp1283	2	145474	A	G
1284	snp1284	2	145486	A	G
1285	snp1285	2	145980	G	T
1286	snp1286	2	146099	C	T
1287	snp1287	2	146107	C	A
1288	snp1288	2	146113	A	T
1289	snp1289	2	146114	C	T
1290	snp1290	2	146129	T	A
1291	snp1291	2	146169	G	A
1292	snp1292	2	146217	T	G
1293	snp1293	2	146248	A	G
1294	snp1294	2	146312	C	G
1295	snp1295	2	146333	G	A
1296	snp1296	2	146444	C	T
1297	snp1297	2	146609	G	A
1298	snp1298	2	146672	G	T
1299	snp1299	2	146699	G	A
1300	snp1300	2	146992	C	T
1301	snp1301	2	147197	A	T
1302	snp1302	2	147484	A	G
1303	snp1303	2	147946	A	T
1304	snp1304	2	148172	C	T
1305	snp1305	2	148327	A	T
1306	snp1306	2	148429	C	T
1307	snp1307	2	148600	T	A
1308	snp1308	2	149026	C	T
1309	snp1309	2	149182	A	G
1310	snp1310	2	149400	T	C
1311	snp1311	2	149696	A	C
1312	snp1312	2	149872	T	C
1313	snp1313	2	150200	A	T
1314	snp1314	2	150394	G	A
1315	snp1315	2	150513	C	T
1316	snp1316	2	150781	T	C
1317	snp1317	2	151212	A	T
1318	snp1318	2	151397	T	C
1319	snp1319	2	151407	G	T
1320	snp1320	2	151574	T	C
1321	snp1321	2	151682	A	G
1322	snp1322	2	151709	G	A
1323	snp1323	2	151724	G	A
1324	snp1324	2	151946	A	G
1325	snp1325	2	151976	G	A
1326	snp1326	2	152073	C	T
1327	snp1327	2	152204	A	G
1328	snp1328	2	152451	T	C
1329	snp1329	2	152612	A	G
1330	snp1330	2	152624	C	T
1331	snp1331	2	152750	A	C
1332	snp1332	2	152894	A	G
1333	snp1333	2	152949	A	G
1334	snp1334	2	153007	C	T
1335	snp1335	2	153035	G	A
1336	snp1336	2	153228	G	A
1337	snp1337	2	153455	A	C
1338	snp1338	2	153787	T	A
1339	snp1339	2	154001	A	C
1340	snp1340	2	154142	G	A
1341	snp1341	2	154740	A	G
1342	snp1342	2	154799	G	A
1343	snp1343	2	155354	A	G
1344	snp1344	2	155591	C	T
1345	snp1345	2	155739	T	G
1346	snp1346	2	155783	A	G
1347	snp1347	2	155846	C	T
1348	snp1348	2	155972	C	T
1349	snp1349	2	156194	C	T
1350	snp1350	2	156203	C	A
1351	snp1351	2	156261	T	G
1352	snp1352	2	158114	A	G
1353	snp1353	2	158591	C	T
1354	snp1354	2	158800	G	T
1355	snp1355	2	158803	A	G
1356	snp1356	2	158953	G	A
1357	snp1357	2	159079	C	T
1358	snp1358	2	159139	T	G
1359	snp1359	2	159797	C	T
1360	snp1360	2	159857	C	G
1361	snp1361	2	159891	A	C
1362	snp1362	2	159926	C	A
1363	snp1363	2	160143	T	G
1364	snp1364	2	160403	G	T
1365	snp1365	2	160810	T	G
1366	snp1366	2	161065	G	A
1367	snp1367	2	161229	G	T
1368	snp1368	2	161297	G	A
1369	snp1369	2	161451	G	A
1370	snp1370	2	161484	T	G
1371	snp1371	2	161687	T	C
1372	snp1372	2	161757	G	A
1373	snp1373	2	161840	T	C
1374	snp1374	2	162251	A	G
1375	snp1375	2	162420	T	C
1376	snp1376	2	162696	A	G
1377	snp1377	2	162773	T	C
1378	snp1378	2	163080	G	A
1379	snp1379	2	163180	C	T
1380	snp1380	2	163284	A	G
1381	snp1381	2	163349	G	T
1382	snp1382	2	163497	A	G
1383	snp1383	2	163787	A	C
1384	snp1384	2	163854	T	C
1385	snp1385	2	163892	C	T
1386	snp1386	2	163967	A	G
1387	snp1387	2	163989	G	A
1388	snp1388	2	164378	T	C
1389	snp1389	2	164419	T	C
1390	snp1390	2	164828	C	T
1391	snp1391	2	164914	A	G
1392	snp1392	2	164995	T	G
1393	snp1393	2	165048	C	T
1394	snp1394	2	165107	A	G
1395	snp1395	2	165259	G	A
1396	snp1396	2	165525	G	A
1397	snp1397	2	165675	A	G
1398	snp1398	2	165680	A	C
1399	snp1399	2	165729	T	C
1400	snp1400	2	165877	T	C
1401	snp1401	2	166019	T	C
1402	snp1402	2	166311	C	T
1403	snp1403	2	166544	G	A
1404	snp1404	2	166572	C	T
1405	snp1405	2	166703	G	A
1406	snp1406	2	166909	C	G
1407	snp1407	2	167174	A	G
1408	snp1408	2	167373	C	T
1409	snp1409	2	167426	G	A
1410	snp1410	2	167527	G	A
1411	snp1411	2	167897	A	G
1412	snp1412	2	167998	G	A
1413	snp1413	2	168012	T	A
1414	snp1414	2	168036	A	C
1415	snp1415	2	168062	C	A
1416	snp1416	2	168065	T	C
1417	snp1417	2	168150	C	G
1418	snp1418	2	168194	G	A
1419	snp1419	2	168448	T	C
1420	snp1420	2	168467	T	G
1421	snp1421	2	168536	A	G
1422	snp1422	2	168653	G	A
1423	snp1423	2	168711	C	T
1424	snp1424	2	168731	A	G
1425	snp1425	2	168747	A	G
1426	snp1426	2	168775	A	T
1427	snp1427	2	168802	T	C
1428	snp1428	2	169483	A	G
1429	snp1429	2	169496	G	C
1430	snp1430	2	169566	G	T
1431	snp1431	2	169589	A	G
1432	snp1432	2	169621	C	T
1433	snp1433	2	169651	C	A
1434	snp1434	2	169820	G	T
1435	snp1435	2	169875	T	C
1436	snp1436	2	170167	C	G
1437	snp1437	2	170206	G	T
1438	snp1438	2	170207	C	T
1439	snp1439	2	170208	C	T
1440	snp1440	2	170320	A	C
1441	snp1441	2	170442	T	C
1442	snp1442	2	170790	T	C
1443	snp1443	2	171183	G	T
1444	snp1444	2	171433	A	G
1445	snp1445	2	171570	A	G
1446	snp1446	2	171612	G	C
1447	snp1447	2	172028	G	C
1448	snp1448	2	172038	T	A
1449	snp1449	2	172113	T	C
1450	snp1450	2	172223	A	G
1451	snp1451	2	172245	C	T
1452	snp1452	2	172262	A	G
1453	snp1453	2	172346	A	T
1454	snp1454	2	172488	A	G
1455	snp1455	2	173028	T	C
1456	snp1456	2	173043	A	G
1457	snp1457	2	173254	A	T
1458	snp1458	2	173385	G	A
1459	snp1459	2	173659	T	C
1460	snp1460	2	173973	T	C
1461	snp1461	2	174030	G	A
1462	snp1462	2	174060	T	C
1463	snp1463	2	174535	C	T
1464	snp1464	2	174555	A	C
1465	snp1465	2	174597	A	G
1466	snp1466	2	174599	G	C
1467	snp1467	2	174685	A	G
1468	snp1468	2	174688	C	T
1469	snp1469	2	174853	C	T
1470	snp1470	2	174871	A	T
1471	snp1471	2	175054	A	G
1472	snp1472	2	175109	T	A
1473	snp1473	2	175409	A	G
1474	snp1474	2	175439	G	A
1475	snp1475	2	175505	C	A
1476	snp1476	2	175526	A	G
1477	snp1477	2	175784	T	C
1478	snp1478	2	175964	T	C
1479	snp1479	2	176009	A	G
1480	snp1480	2	176084	T	C
1481	snp1481	2	176261	T	C
1482	snp1482	2	177622	G	A
1483	snp1483	2	177793	G	A
1484	snp1484	2	178351	C	T
1485	snp1485	2	179248	A	G
1486	snp1486	2	179257	C	T
1487	snp1487	2	179290	C	G
1488	snp1488	2	179410	T	C
1489	snp1489	2	179872	T	C
1490	snp1490	2	180070	T	G
1491	snp1491	2	180255	G	T
1492	snp1492	2	180379	A	G
1493	snp1493	2	180607	G	A
1494	snp1494	2	181033	T	C
1495	snp1495	2	181034	G	T
1496	snp1496	2	181279	C	T
1497	snp1497	2	181425	A	C
1498	snp1498	2	181635	C	T
1499	snp1499	2	181647	T	C
1500	snp1500	2	182128	T	C
1501	snp1501	2	182137	G	T
1502	snp1502	2	182323	C	G
1503	snp1503	2	182436	T	C
1504	snp1504	2	182758	A	G
1505	snp1505	2	182892	G	A
1506	snp1506	2	182901	C	T
1507	snp1507	2	183084	A	C
1508	snp1508	2	183117	T	C
1509	snp1509	2	183198	T	C
1510	snp1510	2	183456	A	G
1511	snp1511	2	183459	C	T
1512	snp1512	2	183619	T	C
1513	snp1513	2	183810	C	T
1514	snp1514	2	183889	C	T
1515	snp1515	2	184146	T	C
1516	snp1516	2	184236	G	C
1517	snp1517	2	184249	T	C
1518	snp1518	2	184343	T	C
1519	snp1519	2	184372	C	T
1520	snp1520	2	184388	G	A
1521	snp1521	2	184606	C	A
1522	snp1522	2	184932	A	C
1523	snp1523	2	184941	T	A
1524	snp1524	2	185376	G	A
1525	snp1525	2	185442	C	G
1526	snp1526	2	185478	C	G
1527	snp1527	2	185492	C	T
1528	snp1528	2	185526	A	G
1529	snp1529	2	185579	A	G
1530	snp1530	2	185762	T	C
1531	snp1531	2	185891	T	A
1532	snp1532	2	185922	A	G
1533	snp1533	2	185954	A	G
1534	snp1534	2	185979	T	A
1535	snp1535	2	186008	T	G
1536	snp1536	2	186049	T	A
1537	snp1537	2	186067	A	G
1538	snp1538	2	186185	G	A
1539	snp1539	2	186210	G	C
1540	snp1540	2	186253	A	G
1541	snp1541	2	186366	A	G
1542	snp1542	2	186379	T	C
1543	snp1543	2	186397	T	C
1544	snp1544	2	186424	A	G
1545	snp1545	2	186525	A	G
1546	snp1546	2	186623	C	T
1547	snp1547	2	186648	C	G
1548	snp1548	2	186709	A	T
1549	snp1549	2	186753	G	A
1550	snp1550	2	186759	G	A
1551	snp1551	2	186778	A	G
1552	snp1552	2	186915	T	C
1553	snp1553	2	187153	G	A
1554	snp1554	2	187157	G	A
1555	snp1555	2	187788	C	T
1556	snp1556	2	187873	T	C
1557	snp1557	2	188701	G	A
1558	snp1558	2	188734	T	C
1559	snp1559	2	188743	G	A
1560	snp1560	2	189163	A	C
1561	snp1561	2	189263	T	C
1562	snp1562	2	189739	G	C
1563	snp1563	2	190246	C	T
1564	snp1564	2	190255	A	G
1565	snp1565	2	190308	T	C
1566	snp1566	2	190351	C	T
1567	snp1567	2	190355	C	T
1568	snp1568	2	190452	A	G
1569	snp1569	2	190737	A	T
1570	snp1570	2	190816	G	A
1571	snp1571	2	190944	T	C
1572	snp1572	2	190980	G	C
1573	snp1573	2	191084	T	A
1574	snp1574	2	191087	A	G
1575	snp1575	2	191088	A	G
1576	snp1576	2	191090	T	G
1577	snp1577	2	191091	G	C
1578	snp1578	2	191207	T	C
1579	snp1579	2	191214	G	A
1580	snp1580	2	191222	C	T
1581	snp1581	2	191226	C	T
1582	snp1582	2	191228	C	T
1583	snp1583	2	191242	C	A
1584	snp1584	2	191281	A	G
1585	snp1585	2	191288	T	C
1586	snp1586	2	191289	A	G
1587	snp1587	2	191294	C	T
1588	snp1588	2	191298	T	A
1589	snp1589	2	191304	C	A
1590	snp1590	2	191311	A	C
1591	snp1591	2	191363	C	T
1592	snp1592	2	191377	A	G
1593	snp1593	2	191422	G	A
1594	snp1594	2	191424	T	C
1595	snp1595	2	191470	A	T
1596	snp1596	2	191521	G	C
1597	snp1597	2	191528	G	A
1598	snp1598	2	191751	C	T
1599	snp1599	2	191763	G	T
1600	snp1600	2	192085	A	G
1601	snp1601	2	192289	G	C
1602	snp1602	2	192390	C	T
1603	snp1603	2	192591	C	T
1604	snp1604	2	193380	A	G
1605	snp1605	2	193398	C	T
1606	snp1606	2	193450	T	C
1607	snp1607	2	193664	T	C
1608	snp1608	2	193867	C	T
1609	snp1609	2	194057	T	C
1610	snp1610	2	194226	C	T
1611	snp1611	2	195009	C	T
1612	snp1612	2	195168	A	G
1613	snp1613	2	195177	T	A
1614	snp1614	2	195180	C	G
1615	snp1615	2	195719	G	A
1616	snp1616	2	195960	A	T
1617	snp1617	2	196145	C	A
1618	snp1618	2	196155	A	G
1619	snp1619	2	196206	G	A
1620	snp1620	2	196417	A	G
1621	snp1621	2	196581	G	A
1622	snp1622	2	196633	G	A
1623	snp1623	2	196681	A	G
1624	snp1624	2	196912	T	C
1625	snp1625	2	196964	A	T
1626	snp1626	2	197035	A	G
1627	snp1627	2	197372	T	C
1628	snp1628	2	197440	G	A
1629	snp1629	2	197464	T	C
1630	snp1630	2	197474	G	C
1631	snp1631	2	197588	C	G
1632	snp1632	2	197706	C	A
1633	snp1633	2	197713	G	T
1634	snp1634	2	197761	G	A
1635	snp1635	2	197966	A	C
1636	snp1636	2	198029	A	G
1637	snp1637	2	198085	G	C
1638	snp1638	2	198086	T	C
1639	snp1639	2	198093	A	G
1640	snp1640	2	198095	A	G
1641	snp1641	2	198110	A	G
1642	snp1642	2	198168	C	T
1643	snp1643	2	198180	C	T
1644	snp1644	2	198283	T	A
1645	snp1645	2	198368	A	C
1646	snp1646	2	198512	A	G
1647	snp1647	2	198526	A	G
1648	snp1648	2	198605	C	T
1649	snp1649	2	198672	C	T
1650	snp1650	2	198751	T	C
1651	snp1651	2	198778	T	G
1652	snp1652	2	198782	C	T
1653	snp1653	2	198826	A	G
1654	snp1654	2	199139	T	C
1655	snp1655	2	199248	T	C
1656	snp1656	2	199390	T	C
1657	snp1657	2	199391	A	C
1658	snp1658	2	199514	C	T
1659	snp1659	2	199762	A	C
1660	snp1660	2	199961	A	G
1661	snp1661	2	200008	C	T
1662	snp1662	2	200483	G	A
1663	snp1663	2	200522	A	G
1664	snp1664	2	200530	G	T
1665	snp1665	2	200968	C	T
1666	snp1666	2	201063	C	T
1667	snp1667	2	201476	G	A
1668	snp1668	2	201611	T	C
1669	snp1669	2	201647	C	T
1670	snp1670	2	201782	C	T
1671	snp1671	2	201831	G	A
1672	snp1672	2	201879	C	T
1673	snp1673	2	202001	G	C
1674	snp1674	2	202108	A	T
1675	snp1675	2	202227	T	A
1676	snp1676	2	202411	G	A
1677	snp1677	2	202580	C	G
1678	snp1678	2	202724	T	C
1679	snp1679	2	202739	G	T
1680	snp1680	2	203114	C	T
1681	snp1681	2	203566	T	C
1682	snp1682	2	203783	G	C
1683	snp1683	2	203910	C	G
1684	snp1684	2	204179	T	C
1685	snp1685	2	204182	T	C
1686	snp1686	2	204215	T	C
1687	snp1687	2	204404	C	T
1688	snp1688	2	204458	C	T
1689	snp1689	2	204536	A	G
1690	snp1690	2	204923	A	T
1691	snp1691	2	204924	T	C
1692	snp1692	2	204995	C	T
1693	snp1693	2	205151	G	A
1694	snp1694	2	205157	C	A
1695	snp1695	2	205343	A	C
1696	snp1696	2	205891	T	C
1697	snp1697	2	206076	C	G
1698	snp1698	2	206280	T	C
1699	snp1699	2	206369	T	C
1700	snp1700	2	206713	G	A
1701	snp1701	2	207171	C	T
1702	snp1702	2	207192	A	G
1703	snp1703	2	207220	A	G
1704	snp1704	2	207561	T	C
1705	snp1705	2	207923	C	T
1706	snp1706	2	208189	C	T
1707	snp1707	2	208213	C	T
1708	snp1708	2	208351	T	A
1709	snp1709	2	208417	G	A
1710	snp1710	2	208471	A	G
1711	snp1711	2	208543	A	G
1712	snp1712	2	208574	A	G
1713	snp1713	2	208682	T	G
1714	snp1714	2	208735	C	T
1715	snp1715	2	208870	C	T
1716	snp1716	2	208879	G	A
1717	snp1717	2	208915	C	T
1718	snp1718	2	208916	C	G
1719	snp1719	2	208963	C	A
1720	snp1720	2	209245	G	A
1721	snp1721	2	209373	C	T
1722	snp1722	2	209754	A	G
1723	snp1723	2	210006	T	C
1724	snp1724	2	210102	C	T
1725	snp1725	2	210387	A	G
1726	snp1726	2	210582	G	A
1727	snp1727	2	210974	T	C
1728	snp1728	2	210990	G	A
1729	snp1729	2	211332	G	A
1730	snp1730	2	211581	C	T
1731	snp1731	2	212351	G	A
1732	snp1732	2	212495	G	T
1733	snp1733	2	212638	T	C
1734	snp1734	2	212810	T	C
1735	snp1735	2	212882	A	G
1736	snp1736	2	212886	C	G
1737	snp1737	2	213058	C	T
1738	snp1738	2	213466	A	G
1739	snp1739	2	213545	G	C
1740	snp1740	2	213628	T	A
1741	snp1741	2	213728	T	G
1742	snp1742	2	214190	G	C
1743	snp1743	2	214439	G	A
1744	snp1744	2	214711	G	A
1745	snp1745	2	214801	G	A
1746	snp1746	2	214810	C	T
1747	snp1747	2	214891	G	A
1748	snp1748	2	215016	C	A
1749	snp1749	2	215181	G	A
1750	snp1750	2	215946	G	C
1751	snp1751	2	215962	G	A
1752	snp1752	2	216520	A	G
1753	snp1753	2	216541	A	C
1754	snp1754	2	216631	A	G
1755	snp1755	2	216794	T	C
1756	snp1756	2	217015	G	C
1757	snp1757	2	217070	C	T
1758	snp1758	2	217109	T	C
1759	snp1759	2	217360	T	A
1760	snp1760	2	217636	A	G
1761	snp1761	2	217676	C	T
1762	snp1762	2	218039	A	G
1763	snp1763	2	218507	T	C
1764	snp1764	2	218630	C	T
1765	snp1765	2	218666	G	A
1766	snp1766	2	218876	T	C
1767	snp1767	2	219410	C	T
1768	snp1768	2	219506	A	G
1769	snp1769	2	220055	C	T
1770	snp1770	2	220122	G	A
1771	snp1771	2	220136	C	T
1772	snp1772	2	220216	A	G
1773	snp1773	2	220331	C	T
1774	snp1774	2	220403	A	G
1775	snp1775	2	220405	G	A
1776	snp1776	2	220424	A	C
1777	snp1777	2	220451	T	G
1778	snp1778	2	220776	C	T
1779	snp1779	2	220790	C	T
1780	snp1780	2	220911	G	T
1781	snp1781	2	220914	C	T
1782	snp1782	2	226965	G	A
1783	snp1783	2	226979	T	C
1784	snp1784	2	227201	C	T
1785	snp1785	2	227302	A	G
1786	snp1786	2	227328	G	A
1787	snp1787	2	227387	A	T
1788	snp1788	2	227881	T	C
1789	snp1789	2	228106	T	C
1790	snp1790	2	228251	T	C
1791	snp1791	2	228551	C	T
1792	snp1792	2	228581	A	G
1793	snp1793	2	228645	C	T
1794	snp1794	2	229777	T	C
1795	snp1795	2	230037	A	T
1796	snp1796	2	230255	C	T
1797	snp1797	2	230378	G	C
1798	snp1798	2	230576	A	G
1799	snp1799	2	230849	A	G
1800	snp1800	2	231614	A	G
1801	snp1801	2	231704	A	G
1802	snp1802	2	231837	A	G
1803	snp1803	2	231943	T	C
1804	snp1804	2	232156	C	G
1805	snp1805	2	232618	C	T
1806	snp1806	2	233405	C	T
1807	snp1807	2	234340	T	C
1808	snp1808	2	234385	G	A
1809	snp1809	2	234604	T	C
1810	snp1810	2	234613	T	A
1811	snp1811	2	234673	G	A
1812	snp1812	2	234856	C	G
1813	snp1813	2	235113	C	T
1814	snp1814	2	235845	A	G
1815	snp1815	2	236156	C	T
1816	snp1816	2	236256	T	A
1817	snp1817	2	236313	C	T
1818	snp1818	2	236383	G	A
1819	snp1819	2	236390	G	A
1820	snp1820	2	236391	G	A
1821	snp1821	2	236441	T	A
1822	snp1822	2	236489	C	A
1823	snp1823	2	236626	T	C
1824	snp1824	2	237151	A	G
1825	snp1825	2	237541	C	T
1826	snp1826	2	237656	C	T
1827	snp1827	2	237660	T	C
1828	snp1828	2	237729	A	G
1829	snp1829	2	237971	A	T
1830	snp1830	2	238080	G	C
1831	snp1831	2	238111	A	G
1832	snp1832	2	238137	T	C
1833	snp1833	2	238163	A	T
1834	snp1834	2	238186	G	A
1835	snp1835	2	238189	C	T
1836	snp1836	2	238224	T	A
1837	snp1837	2	238239	G	A
1838	snp1838	2	238346	T	G
1839	snp1839	2	238452	A	G
1840	snp1840	2	238608	A	C
1841	snp1841	2	238611	C	T
1842	snp1842	2	238675	C	T
1843	snp1843	2	238737	G	A
1844	snp1844	2	238944	T	A
1845	snp1845	2	239434	T	A
1846	snp1846	2	239528	A	C
1847	snp1847	2	239597	C	T
1848	snp1848	2	239625	T	C
1849	snp1849	2	239864	G	A
1850	snp1850	2	239951	A	G
1851	snp1851	2	240048	C	A
1852	snp1852	2	240542	C	T
1853	snp1853	2	240840	G	A
1854	snp1854	2	240963	C	T
1855	snp1855	2	241143	A	G
1856	snp1856	2	241196	C	T
1857	snp1857	2	241422	T	C
1858	snp1858	2	241482	C	T
1859	snp1859	2	242012	T	C
1860	snp1860	2	242038	A	G
1861	snp1861	2	242434	G	A
1862	snp1862	2	242746	C	G
1863	snp1863	2	243436	G	A
1864	snp1864	2	243486	G	A
1865	snp1865	2	243609	T	C
1866	snp1866	2	243768	C	T
1867	snp1867	2	243846	C	T
1868	snp1868	2	244011	A	G
1869	snp1869	2	244215	A	G
1870	snp1870	2	244779	A	G
1871	snp1871	2	245034	C	T
1872	snp1872	2	245073	A	G
1873	snp1873	2	245305	C	T
1874	snp1874	2	245747	T	C
1875	snp1875	2	245877	G	A
1876	snp1876	2	246027	T	G
1877	snp1877	2	246059	G	A
1878	snp1878	2	246172	G	A
1879	snp1879	2	246575	T	C
1880	snp1880	2	246579	A	C
1881	snp1881	2	246816	G	A
1882	snp1882	2	246960	C	T
1883	snp1883	2	247040	C	T
1884	snp1884	2	247234	A	G
1885	snp1885	2	247522	G	A
1886	snp1886	2	247531	C	T
1887	snp1887	2	247603	A	T
1888	snp1888	2	247759	G	A
1889	snp1889	2	247789	A	G
1890	snp1890	2	247813	C	T
1891	snp1891	2	247993	C	T
1892	snp1892	2	248152	A	T
1893	snp1893	2	248212	A	G
1894	snp1894	2	248555	G	T
1895	snp1895	2	248659	G	A
1896	snp1896	2	248671	C	G
1897	snp1897	2	248728	A	G
1898	snp1898	2	248918	C	T
1899	snp1899	2	249073	G	A
1900	snp1900	2	249400	G	C
1901	snp1901	2	249533	T	C
1902	snp1902	2	249570	G	A
1903	snp1903	2	249967	A	G
1904	snp1904	2	250250	G	A
1905	snp1905	2	250316	G	A
1906	snp1906	2	250396	A	G
1907	snp1907	2	250482	C	A
1908	snp1908	2	251004	A	T
1909	snp1909	2	251105	T	G
1910	snp1910	2	251134	G	T
1911	snp1911	2	251548	G	A
1912	snp1912	2	251790	C	T
1913	snp1913	2	251800	C	T
1914	snp1914	2	251820	G	C
1915	snp1915	2	251882	A	G
1916	snp1916	2	252013	G	A
1917	snp1917	2	252027	C	T
1918	snp1918	2	252036	C	T
1919	snp1919	2	252044	C	T
1920	snp1920	2	252161	C	G
1921	snp1921	2	252193	A	G
1922	snp1922	2	252305	T	C
1923	snp1923	2	252572	T	G
1924	snp1924	2	252578	C	T
1925	snp1925	2	252589	T	C
1926	snp1926	2	252599	T	C
1927	snp1927	2	252680	A	G
1928	snp1928	2	252704	G	T
1929	snp1929	2	252792	T	G
1930	snp1930	2	253219	G	A
1931	snp1931	2	253709	G	A
1932	snp1932	2	254030	C	T
1933	snp1933	2	254124	T	C
1934	snp1934	2	254349	C	T
1935	snp1935	2	254368	C	T
1936	snp1936	2	254409	C	T
1937	snp1937	2	254436	T	C
1938	snp1938	2	254571	G	A
1939	snp1939	2	254728	C	T
1940	snp1940	2	254834	A	G
1941	snp1941	2	254899	T	A
1942	snp1942	2	254908	T	C
1943	snp1943	2	255127	A	G
1944	snp1944	2	255688	T	A
1945	snp1945	2	255740	G	A
1946	snp1946	2	255743	C	T
1947	snp1947	2	255828	T	C
1948	snp1948	2	256267	C	A
1949	snp1949	2	256925	T	C
1950	snp1950	2	256941	A	T
1951	snp1951	2	257430	C	T
1952	snp1952	2	257913	T	C
1953	snp1953	2	258153	T	C
1954	snp1954	2	258208	A	C
1955	snp1955	2	258211	A	G
1956	snp1956	2	258311	C	G
1957	snp1957	2	258313	G	C
1958	snp1958	2	258409	C	A
1959	snp1959	2	258662	C	T
1960	snp1960	2	258851	T	C
1961	snp1961	2	258852	G	A
1962	snp1962	2	258896	A	G
1963	snp1963	2	258961	A	G
1964	snp1964	2	258965	T	A
1965	snp1965	2	258971	C	T
1966	snp1966	2	259158	A	G
1967	snp1967	2	259235	T	C
1968	snp1968	2	259284	T	G
1969	snp1969	2	259410	A	C
1970	snp1970	2	259419	T	C
1971	snp1971	2	259438	A	T
1972	snp1972	2	259451	T	A
1973	snp1973	2	259521	C	T
1974	snp1974	2	259561	A	G
1975	snp1975	2	265775	G	A
1976	snp1976	2	265831	A	G
1977	snp1977	2	266107	G	A
1978	snp1978	2	266250	A	T
1979	snp1979	2	266324	T	C
1980	snp1980	2	266339	T	G
1981	snp1981	2	266358	C	T
1982	snp1982	2	266478	G	A
1983	snp1983	2	266551	C	G
1984	snp1984	2	266622	T	C
1985	snp1985	2	266791	G	A
1986	snp1986	2	266952	A	G
1987	snp1987	2	267100	A	T
1988	snp1988	2	267510	C	T
1989	snp1989	2	267525	T	A
1990	snp1990	2	267594	A	G
1991	snp1991	2	269396	C	T
1992	snp1992	2	269653	C	T
1993	snp1993	2	274614	C	T
1994	snp1994	2	274729	C	T
1995	snp1995	2	277912	A	G
1996	snp1996	2	278218	C	G
1997	snp1997	2	279910	T	C
1998	snp1998	2	283431	A	C
[truncated: 39,611 more rows]
